# Supplementary material for: Brain tissue heterotopic in the adrenal gland in a child: a scarce case report
Source: Springer Nature journal article supplement (doi:10.1186/s12887-023-04478-0), 2024-02-03

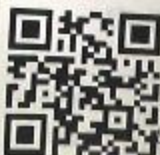

住院号: 1007608

病人ID号: C10479 8800

姓名: 林伊贝 性别: 女

出生日期: 2017-11-13

BB23542089 年龄: 6岁1月 床号: 07

送检科室: 泌尿外科病区

送检材料: 右侧肾上腺囊肿 重量: 1.1g

检查部位: 右侧肾上腺囊肿

BFB

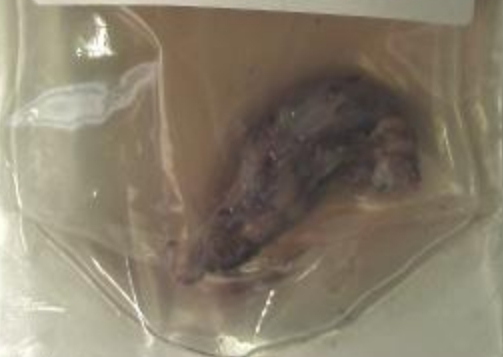

192pt

2023-03-23

14:45:43

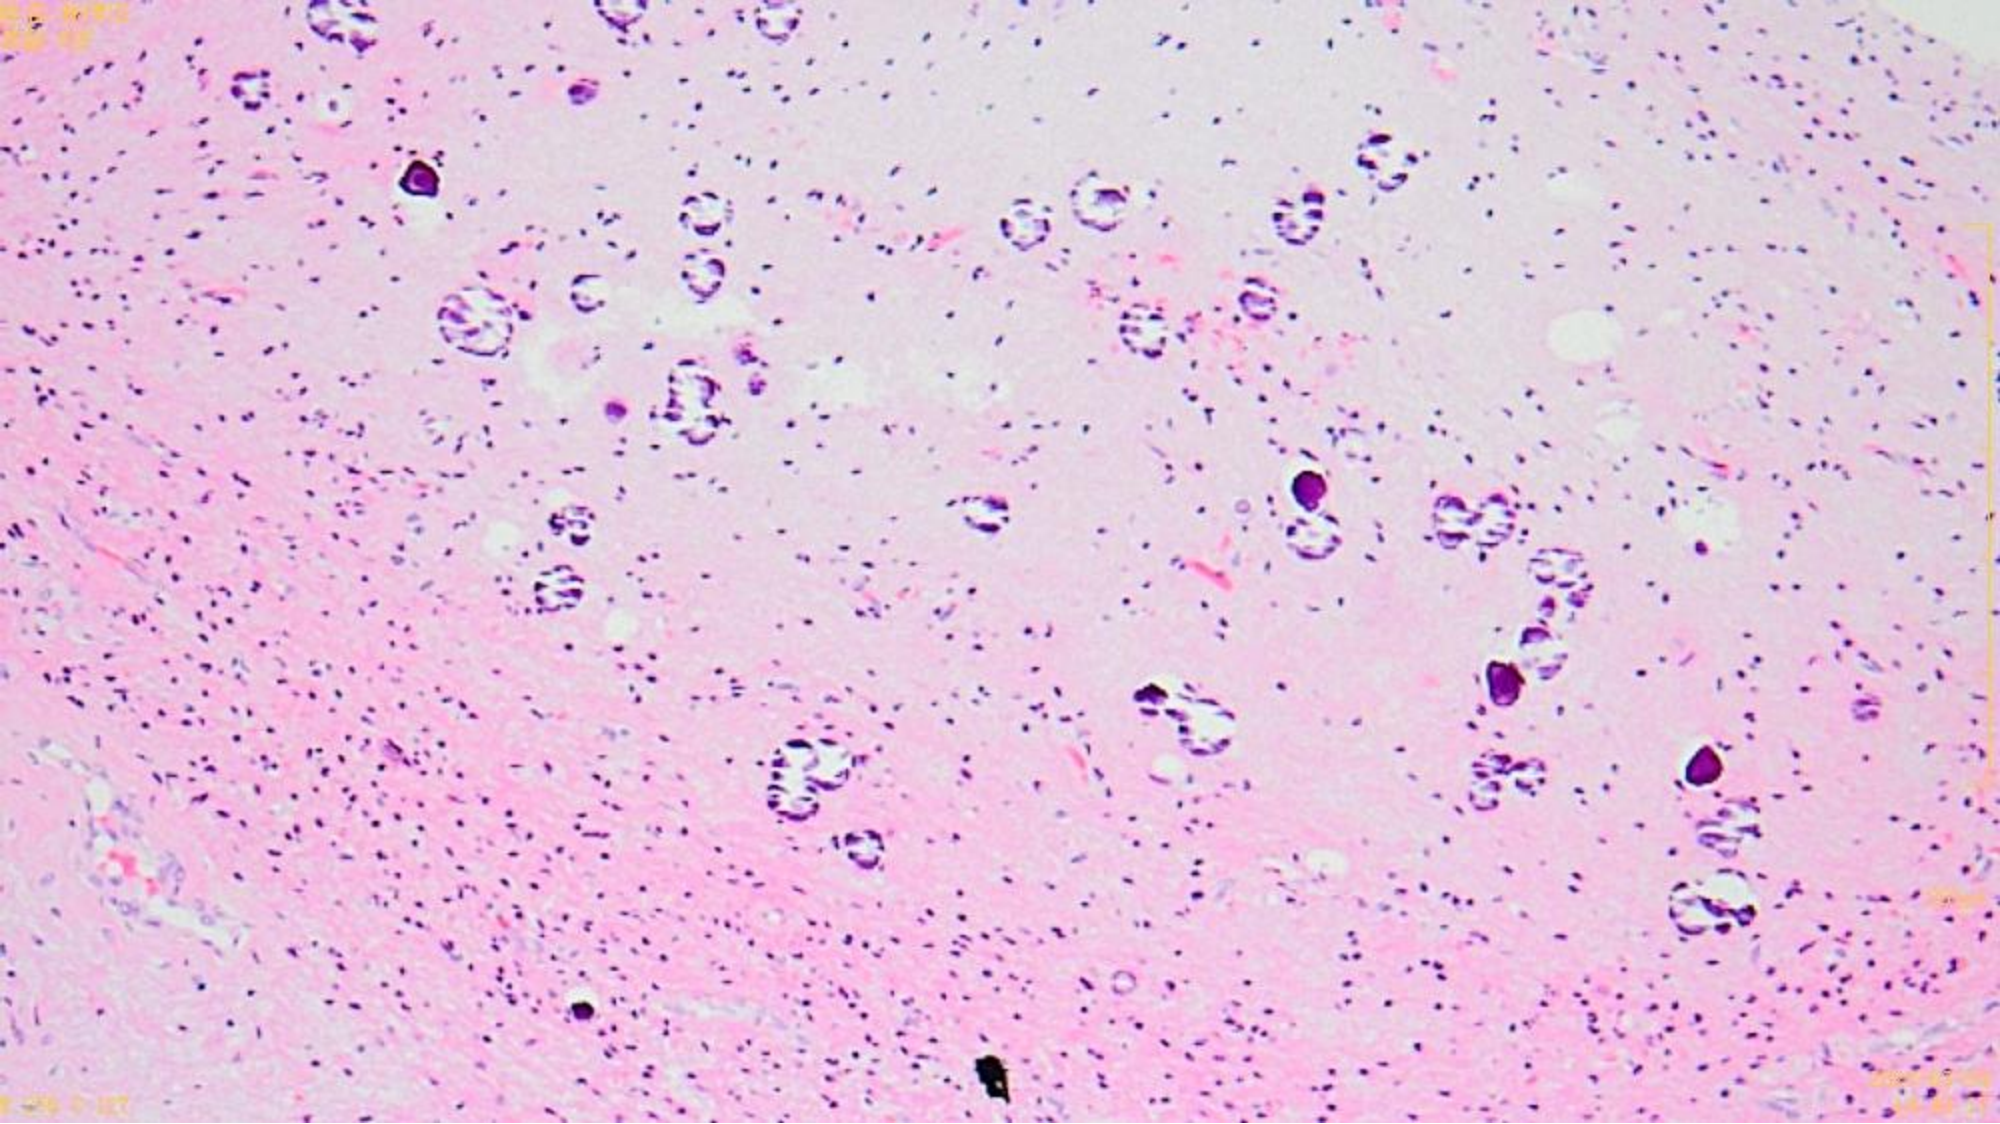



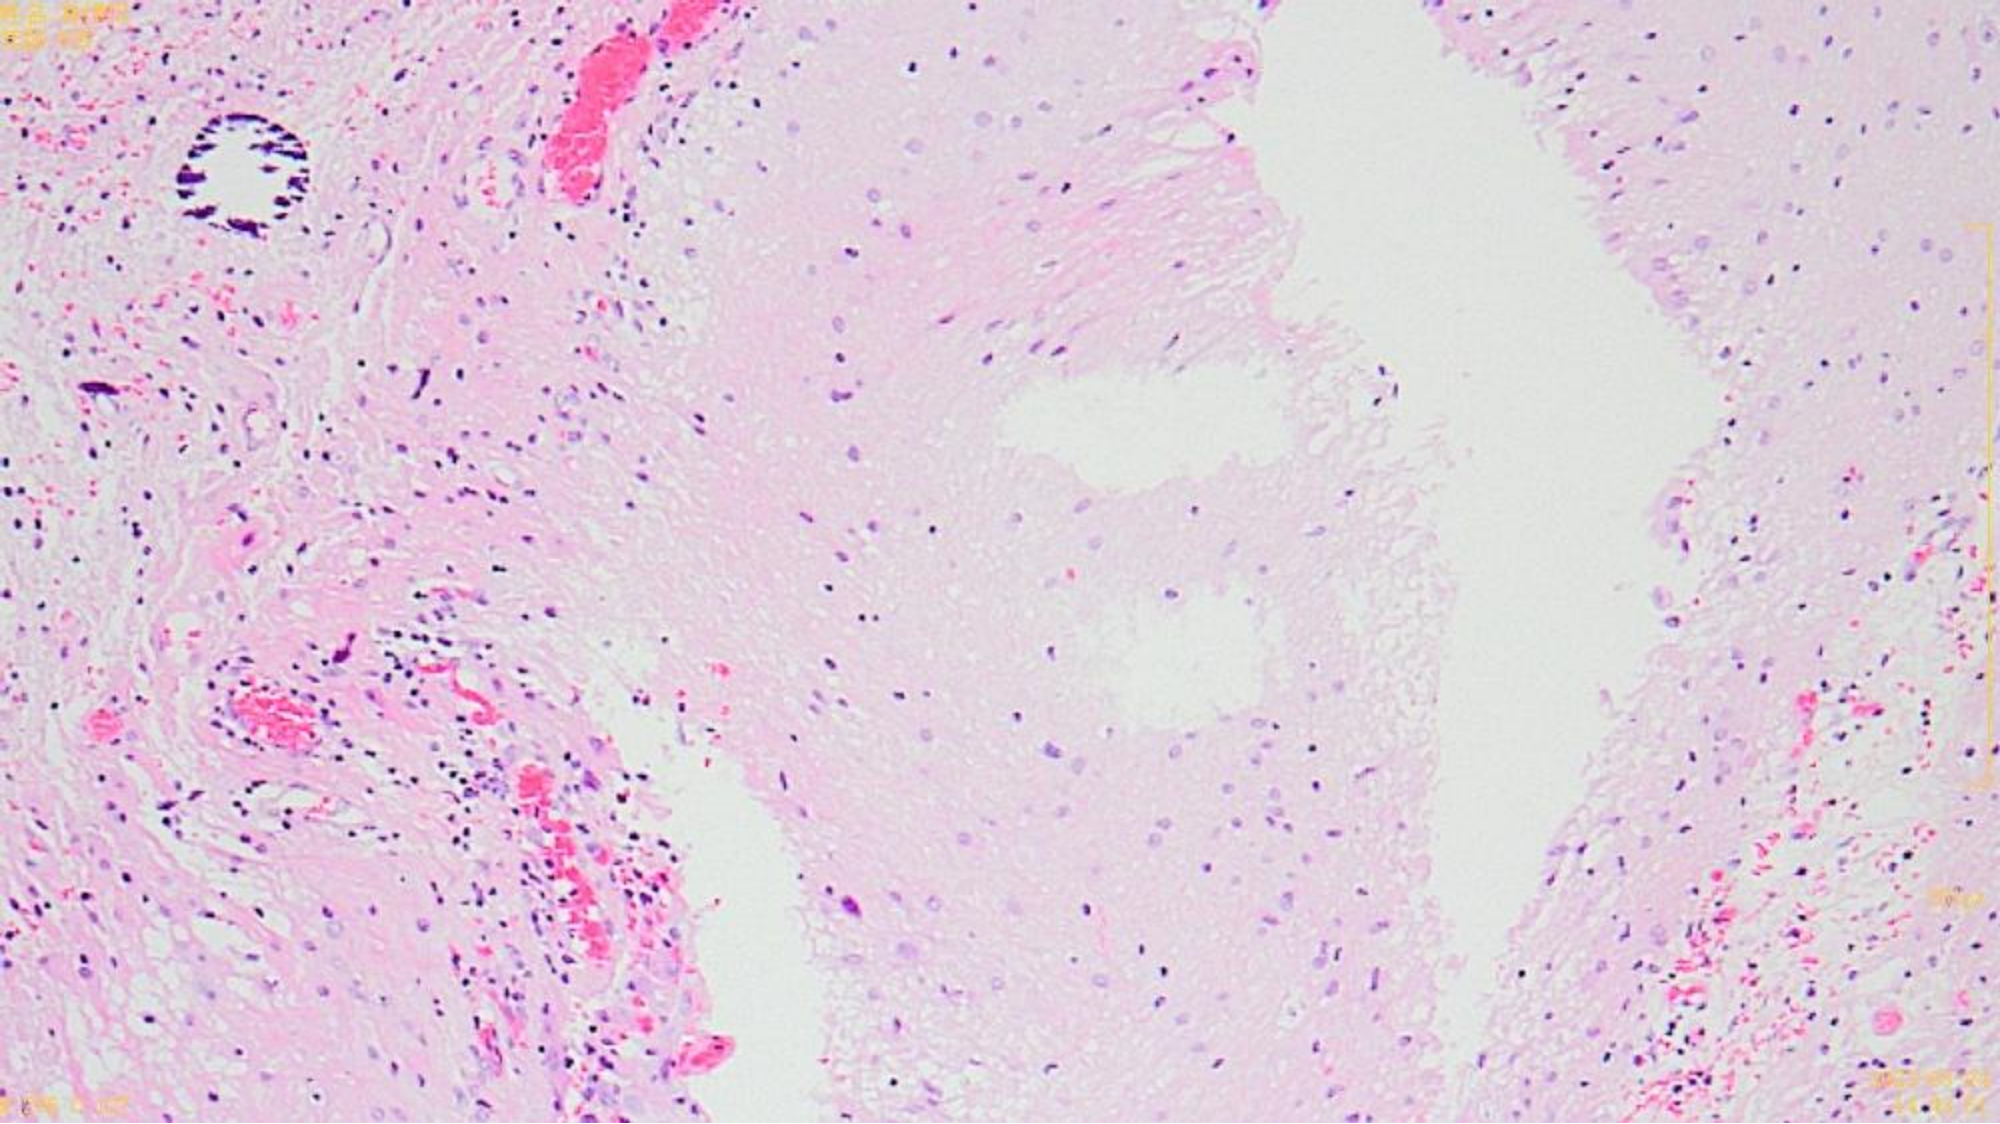



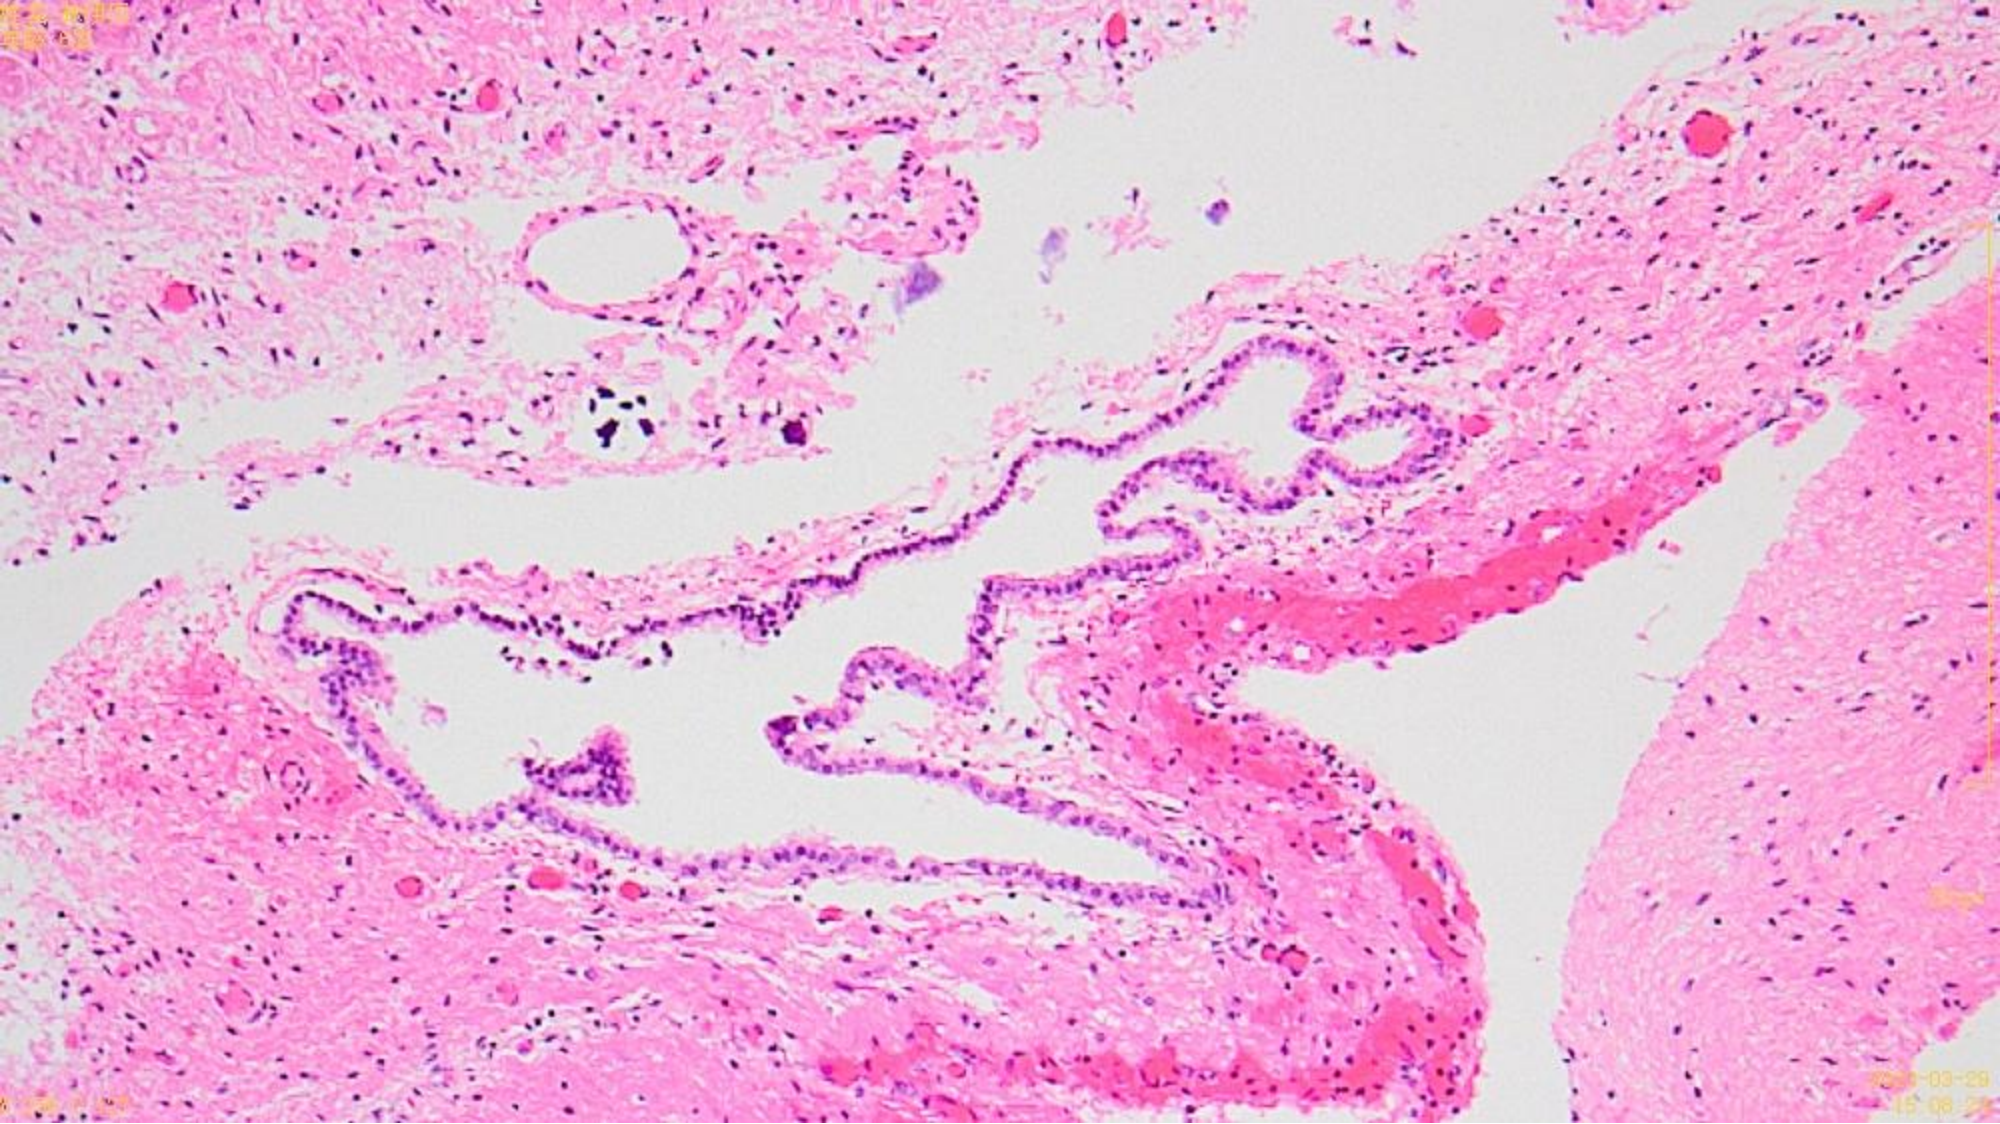



昆儿医院

202301813

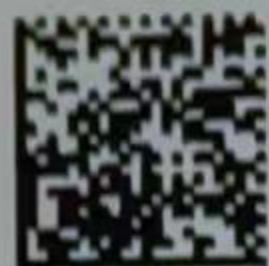

4

ZMeyi

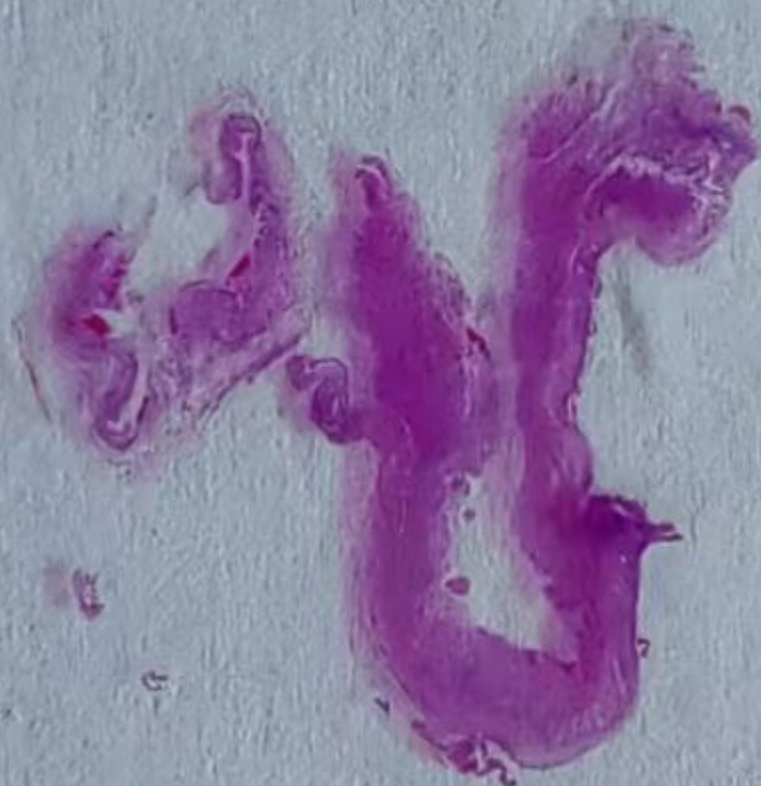

姓名:林伊贝  
编号:CT343419  
年龄:6岁  
性别:女  
部位:腹部

序列:6  
序号:19  
标号:200  
矩阵:512x512

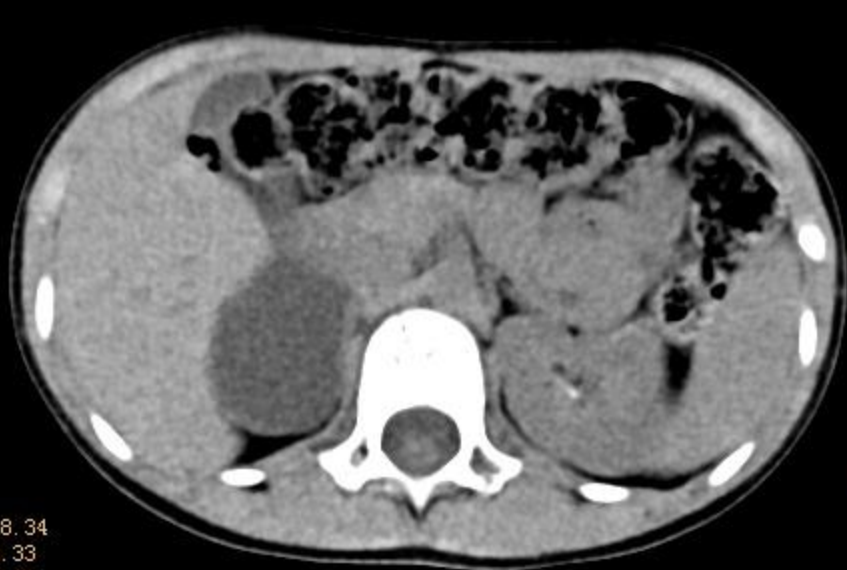

[L]

100mm

HF:-1118.34  
AP:-198.33  
RL:-118.01  
A:092023-078000  
120 kV  
103 mA  
2023-03-13  
09:30:28  
W:200 C:40

[P]

层厚:5.0  
位置:-1118.3  
体位:HFS  
视野:221x221



姓名:林伊贝  
编号:CT343419  
年龄:6岁  
性别:女  
部位:腹部

序列:6  
序号:21  
标号:200  
矩阵:512x512

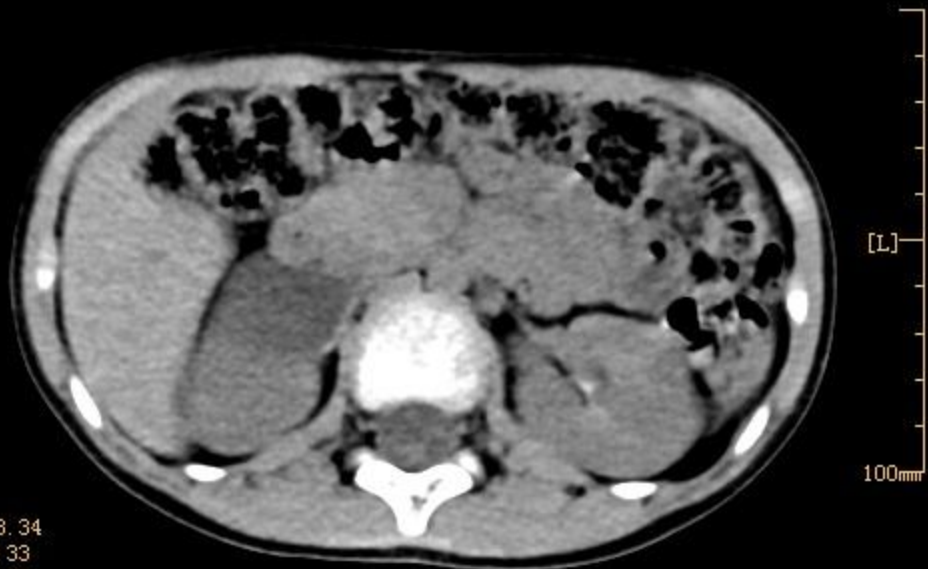

HF:-1128.34  
AP:-198.33  
RL:-118.01  
A:092023-184000  
120 kV  
101 mA  
2023-03-13  
09:30:28  
W:200 C:40

层厚:5.0  
位置:-1128.3  
体位:HFS  
视野:221x221

姓名:林伊贝  
编号:CT343419  
年龄:6岁  
性别:女  
部位:腹部

序列:8  
序号:126  
标号:500  
矩阵:512x512

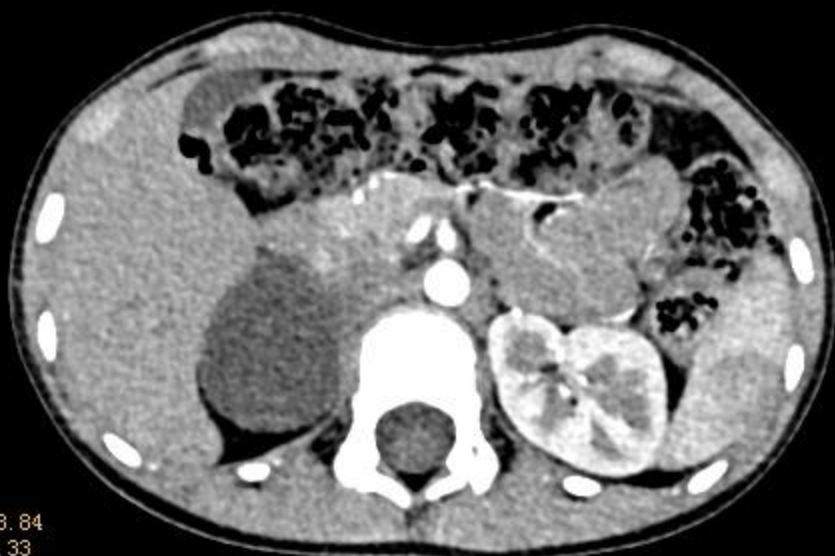

HF:-1113.84  
AP:-198.33  
RL:-118.01  
A:092001-150000  
120 kV  
103 mA  
2023-03-13  
09:32:20  
W:200 C:40

层厚:1.0  
位置:-1113.8  
体位:HFS  
视野:221x221



姓名:林伊贝  
编号:CT343419  
年龄:6岁  
性别:女  
部位:腹部

序列:8  
序号:137  
标号:500  
矩阵:512x512

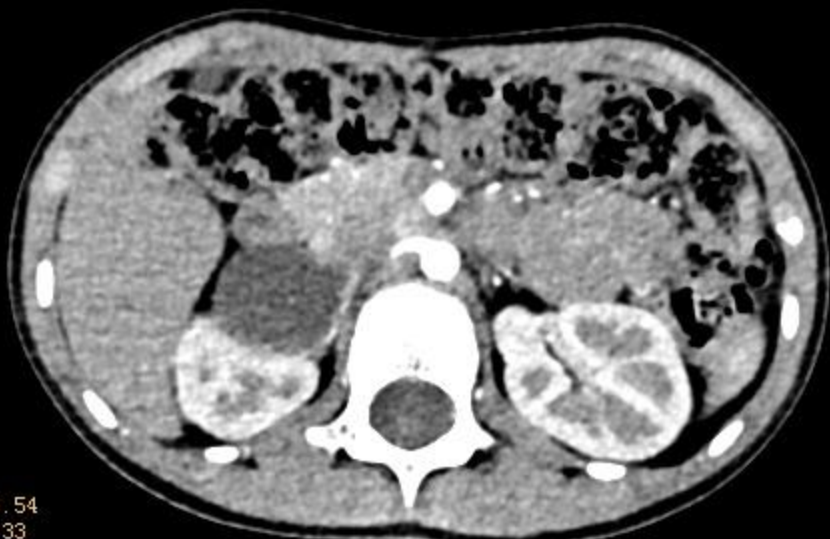

[L]

100mm

HF:-1121.54  
AP:-198.33  
RL:-118.01  
A:092201-033000  
120 kV  
102 mA  
2023-03-13  
09:32:20  
W:200 C:40

[P]

层厚:1.0  
位置:-1121.5  
体位:HFS  
视野:221x221

姓名:林伊贝  
编号:CT343419  
年龄:6岁  
性别:女  
部位:腹部

序列:10  
序号:124  
标号:600  
矩阵:512x512

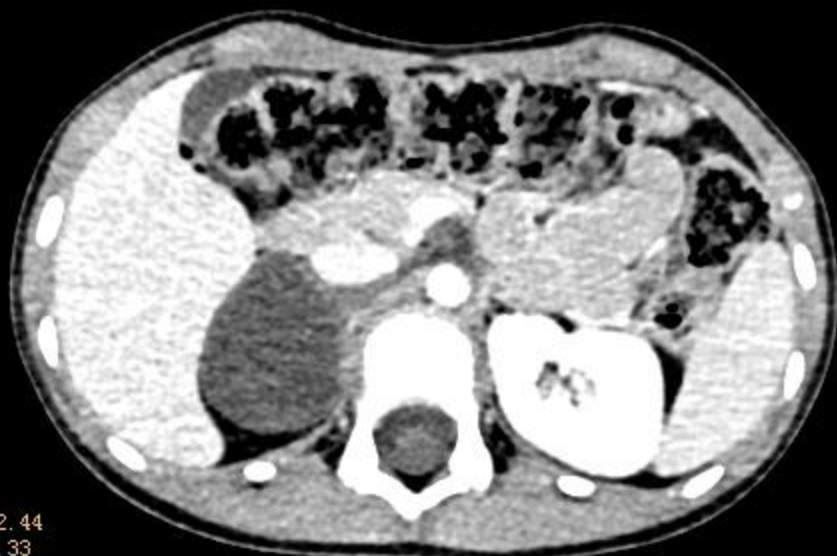

[L]

100mm

HF:-1112.44  
AP:-198.33  
RL:-118.01  
A:092001 019000  
120 kV  
104 mA  
2023-03-13  
09:33:01  
W:200 C:40

[R]

层厚:1.0  
位置:-1112.4  
体位:HFS  
视野:221x221



姓名:林伊贝  
编号:CT343419  
年龄:6岁  
性别:女  
部位:腹部

序列:10  
序号:135  
标号:600  
矩阵:512x512

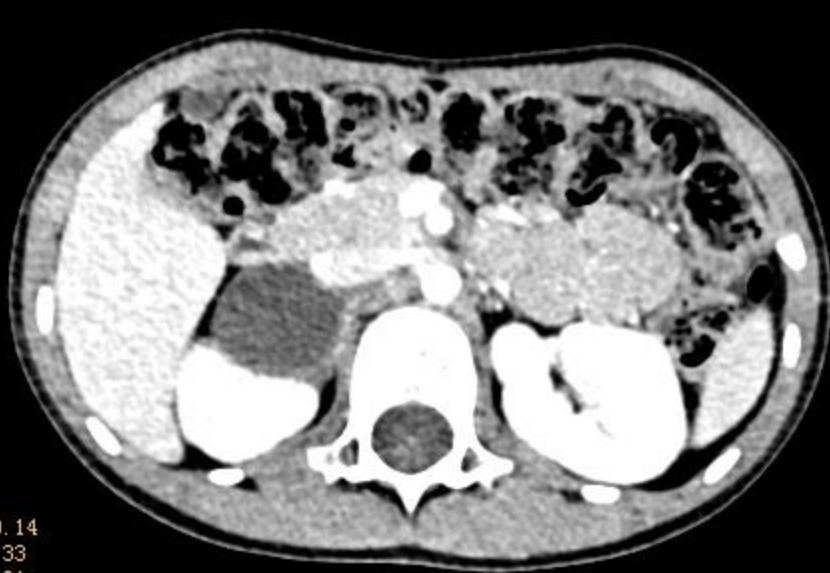

HF:-1120.14  
AP:-198.33  
RL:-118.01  
A:09200 207000  
120 kV  
102 mA  
2023-03-13  
09:33:01  
W:200 C:40

层厚:1.0  
位置:-1120.1  
体位:HFS  
视野:221x221

姓名: lin yi bei  
编号: DR946808  
年龄: 6岁  
性别: 女

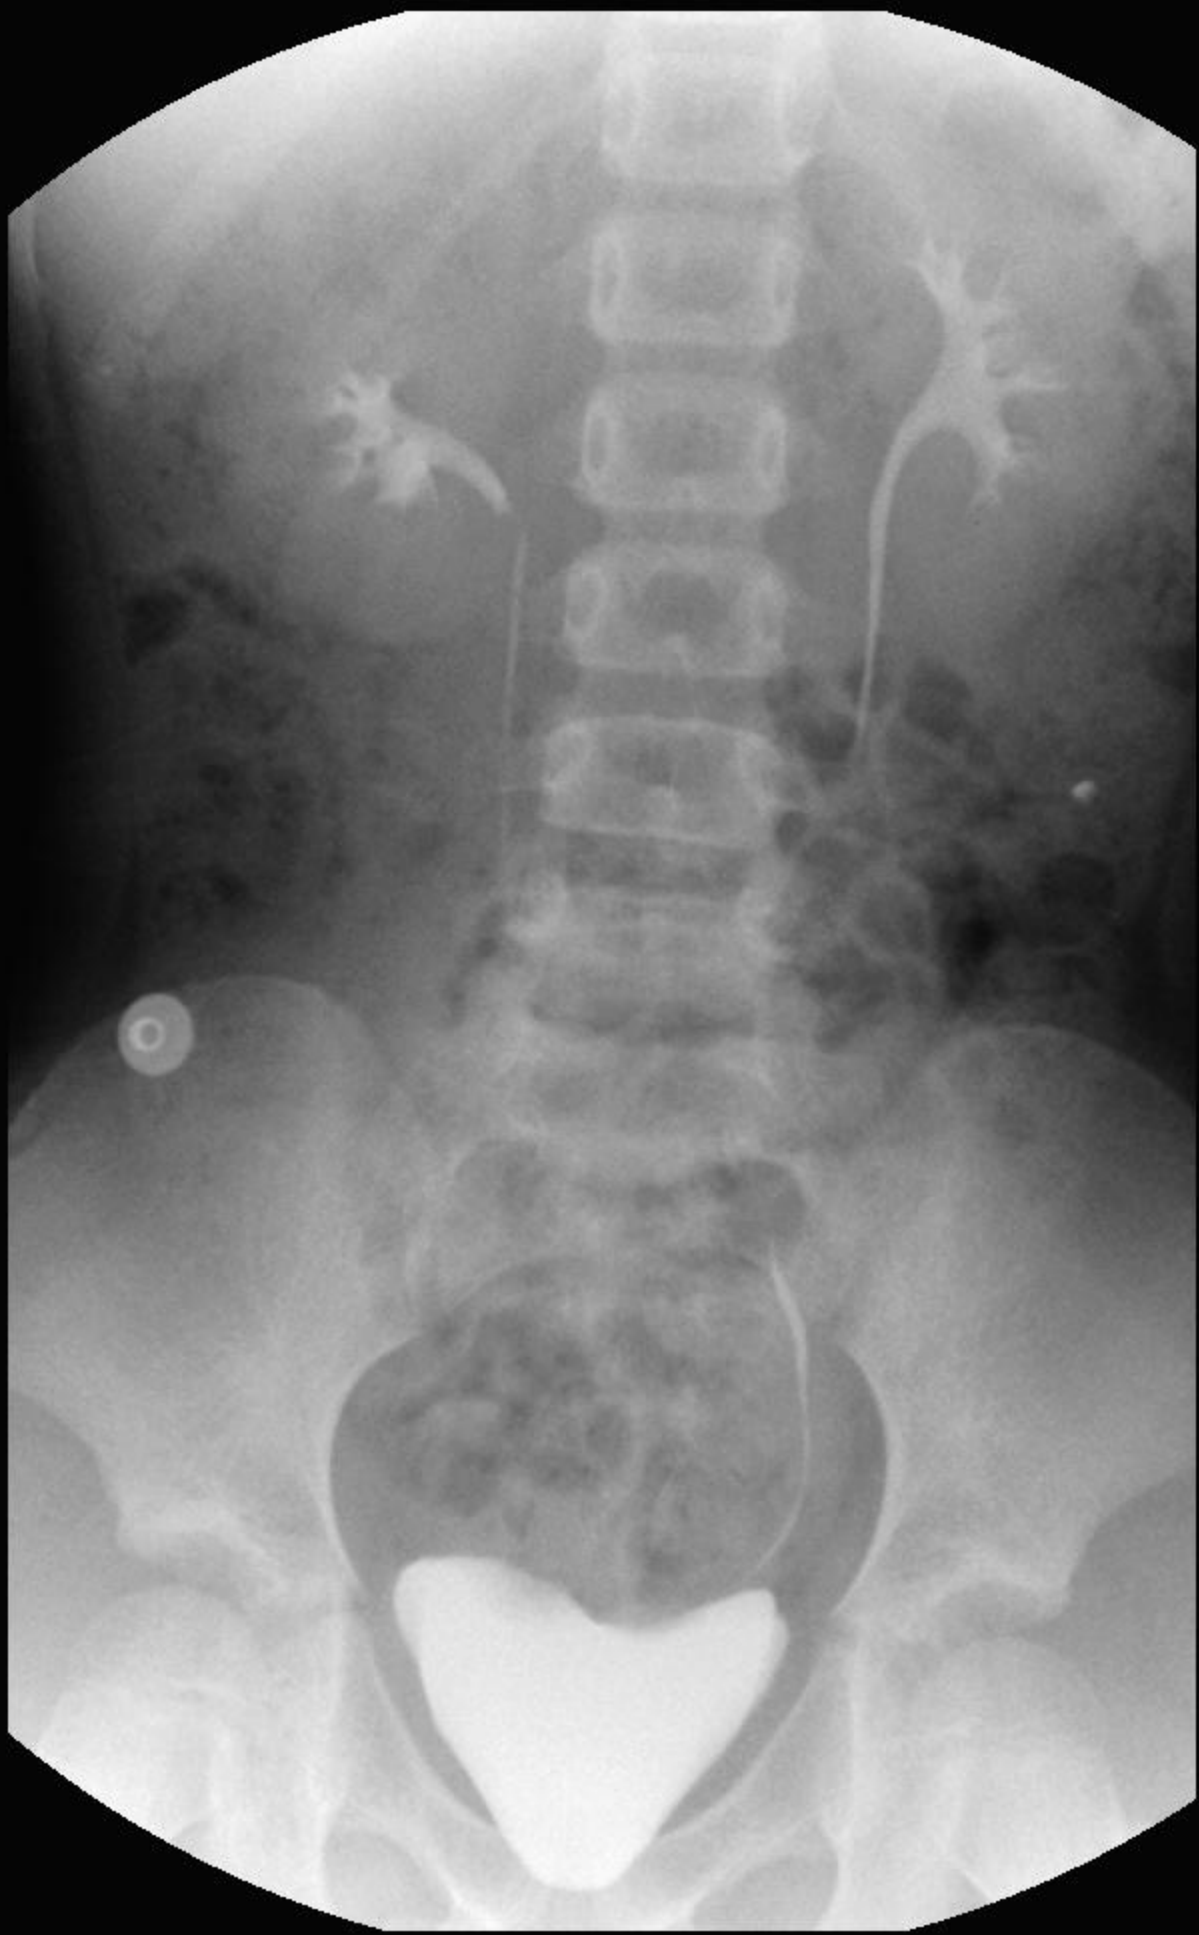

512pt

姓名: LIN YI BEI  
编号: 2343801  
年龄: 6岁  
性别: 女

2343801  
LIN YI BEI 2017/01/13

Kunming Children's Hospital  
CA1-7A / 腹部/ABD-1 / FR32Hz

MI 1.3  
Tis 0.4  
2023-03-11  
08:28:04

增益70/DR55/帧平均9/P95/Frq 分辨力1/12.0厘米

2D 增益60/DR55/帧平均9/P95/Frq 分辨力1/12.0厘米

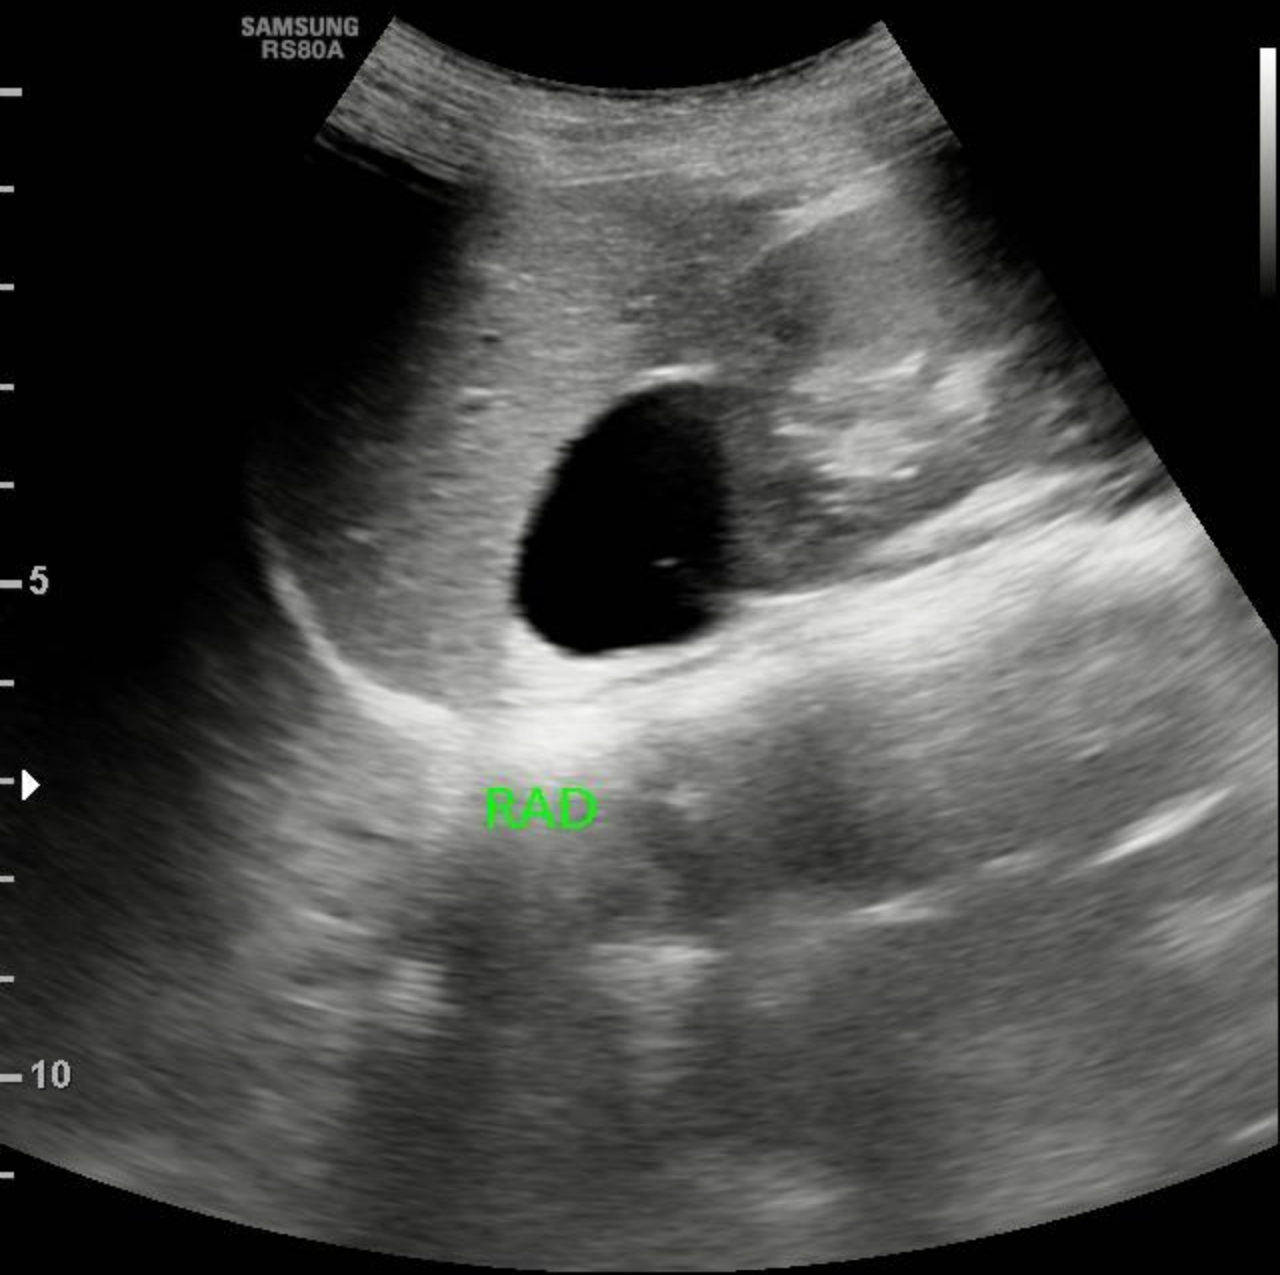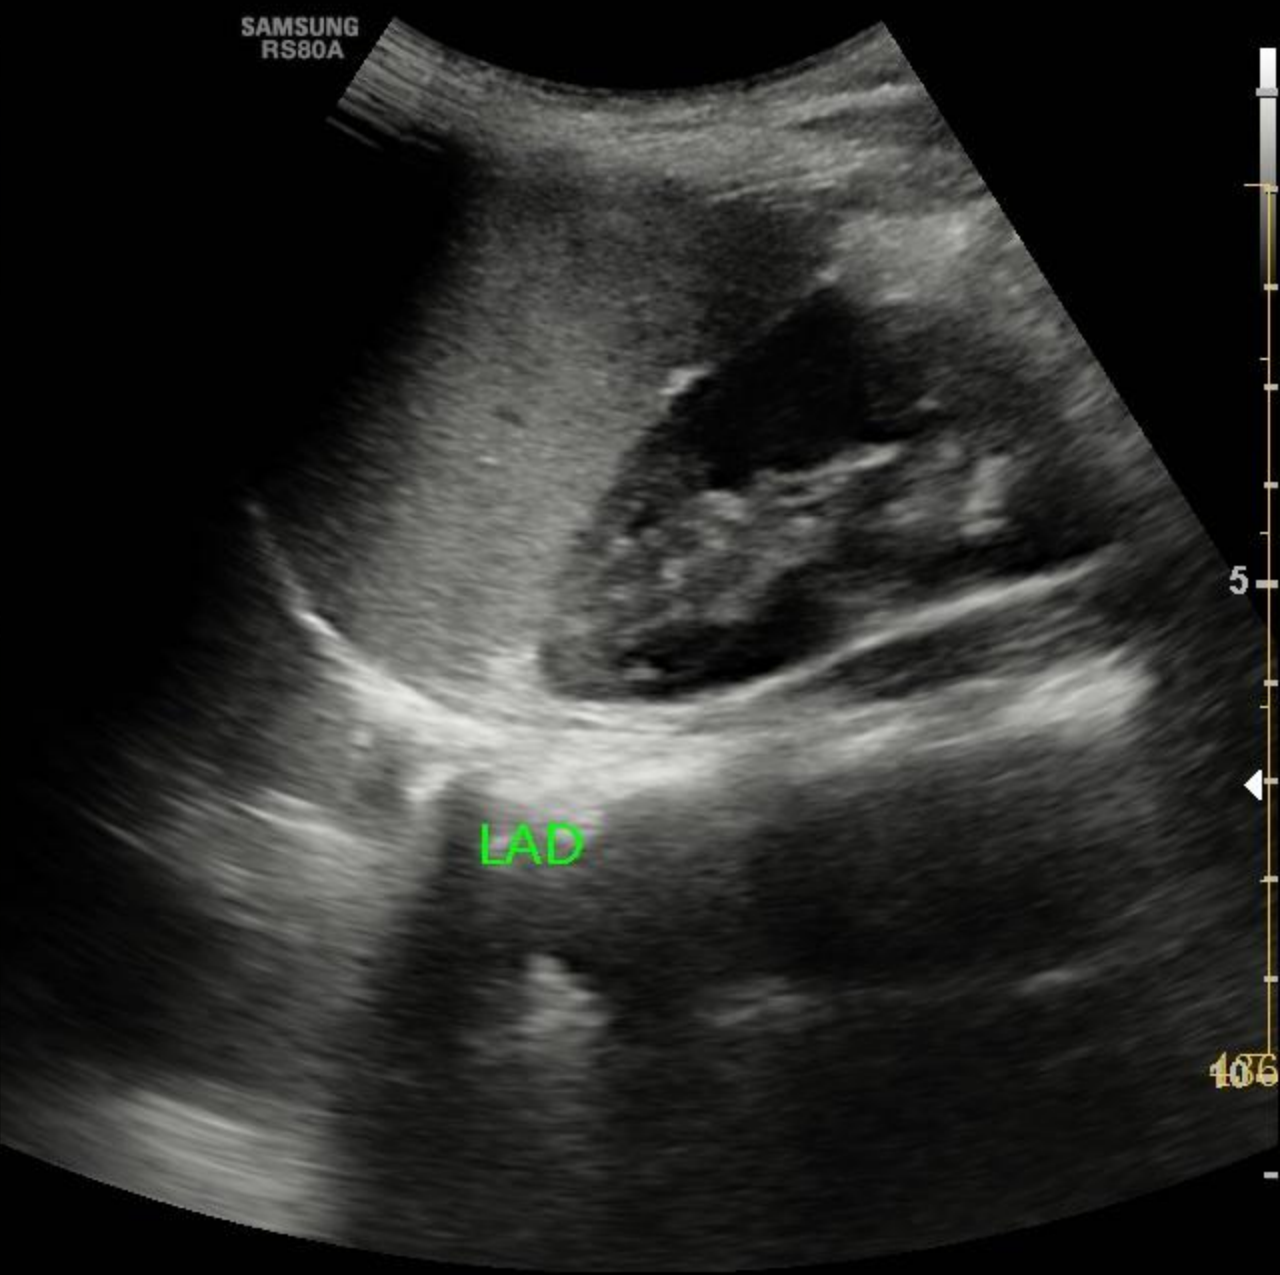



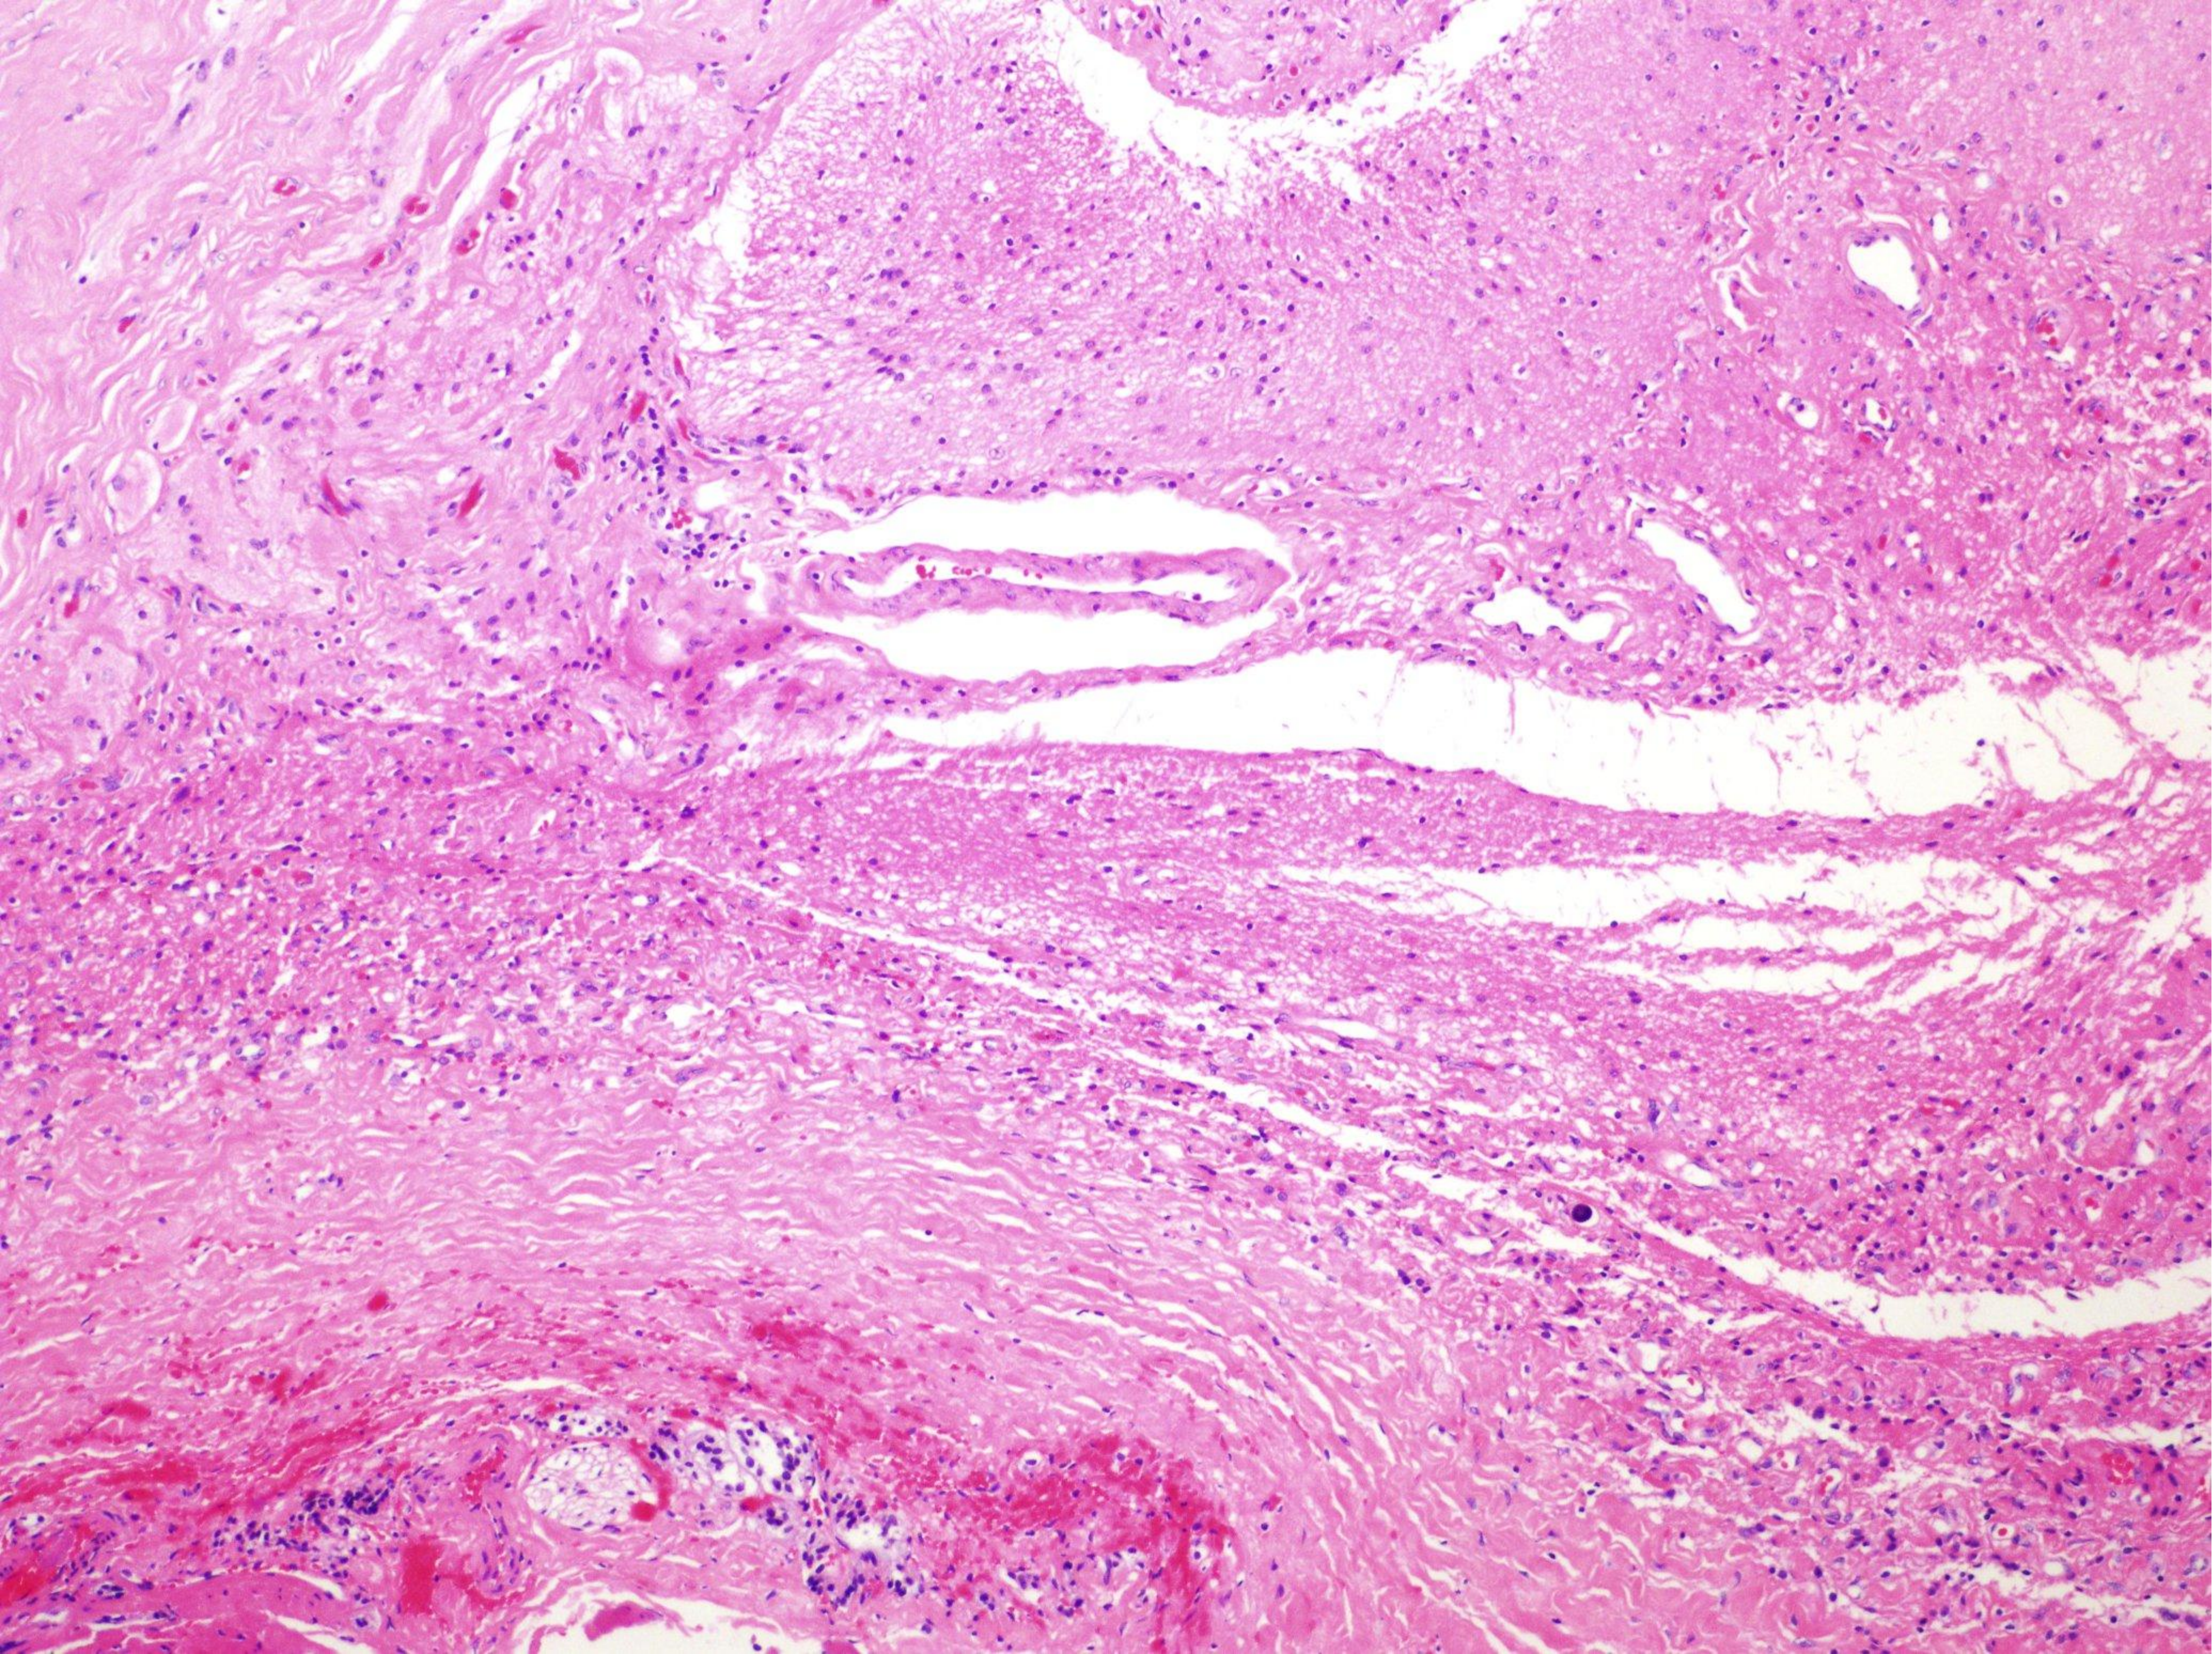



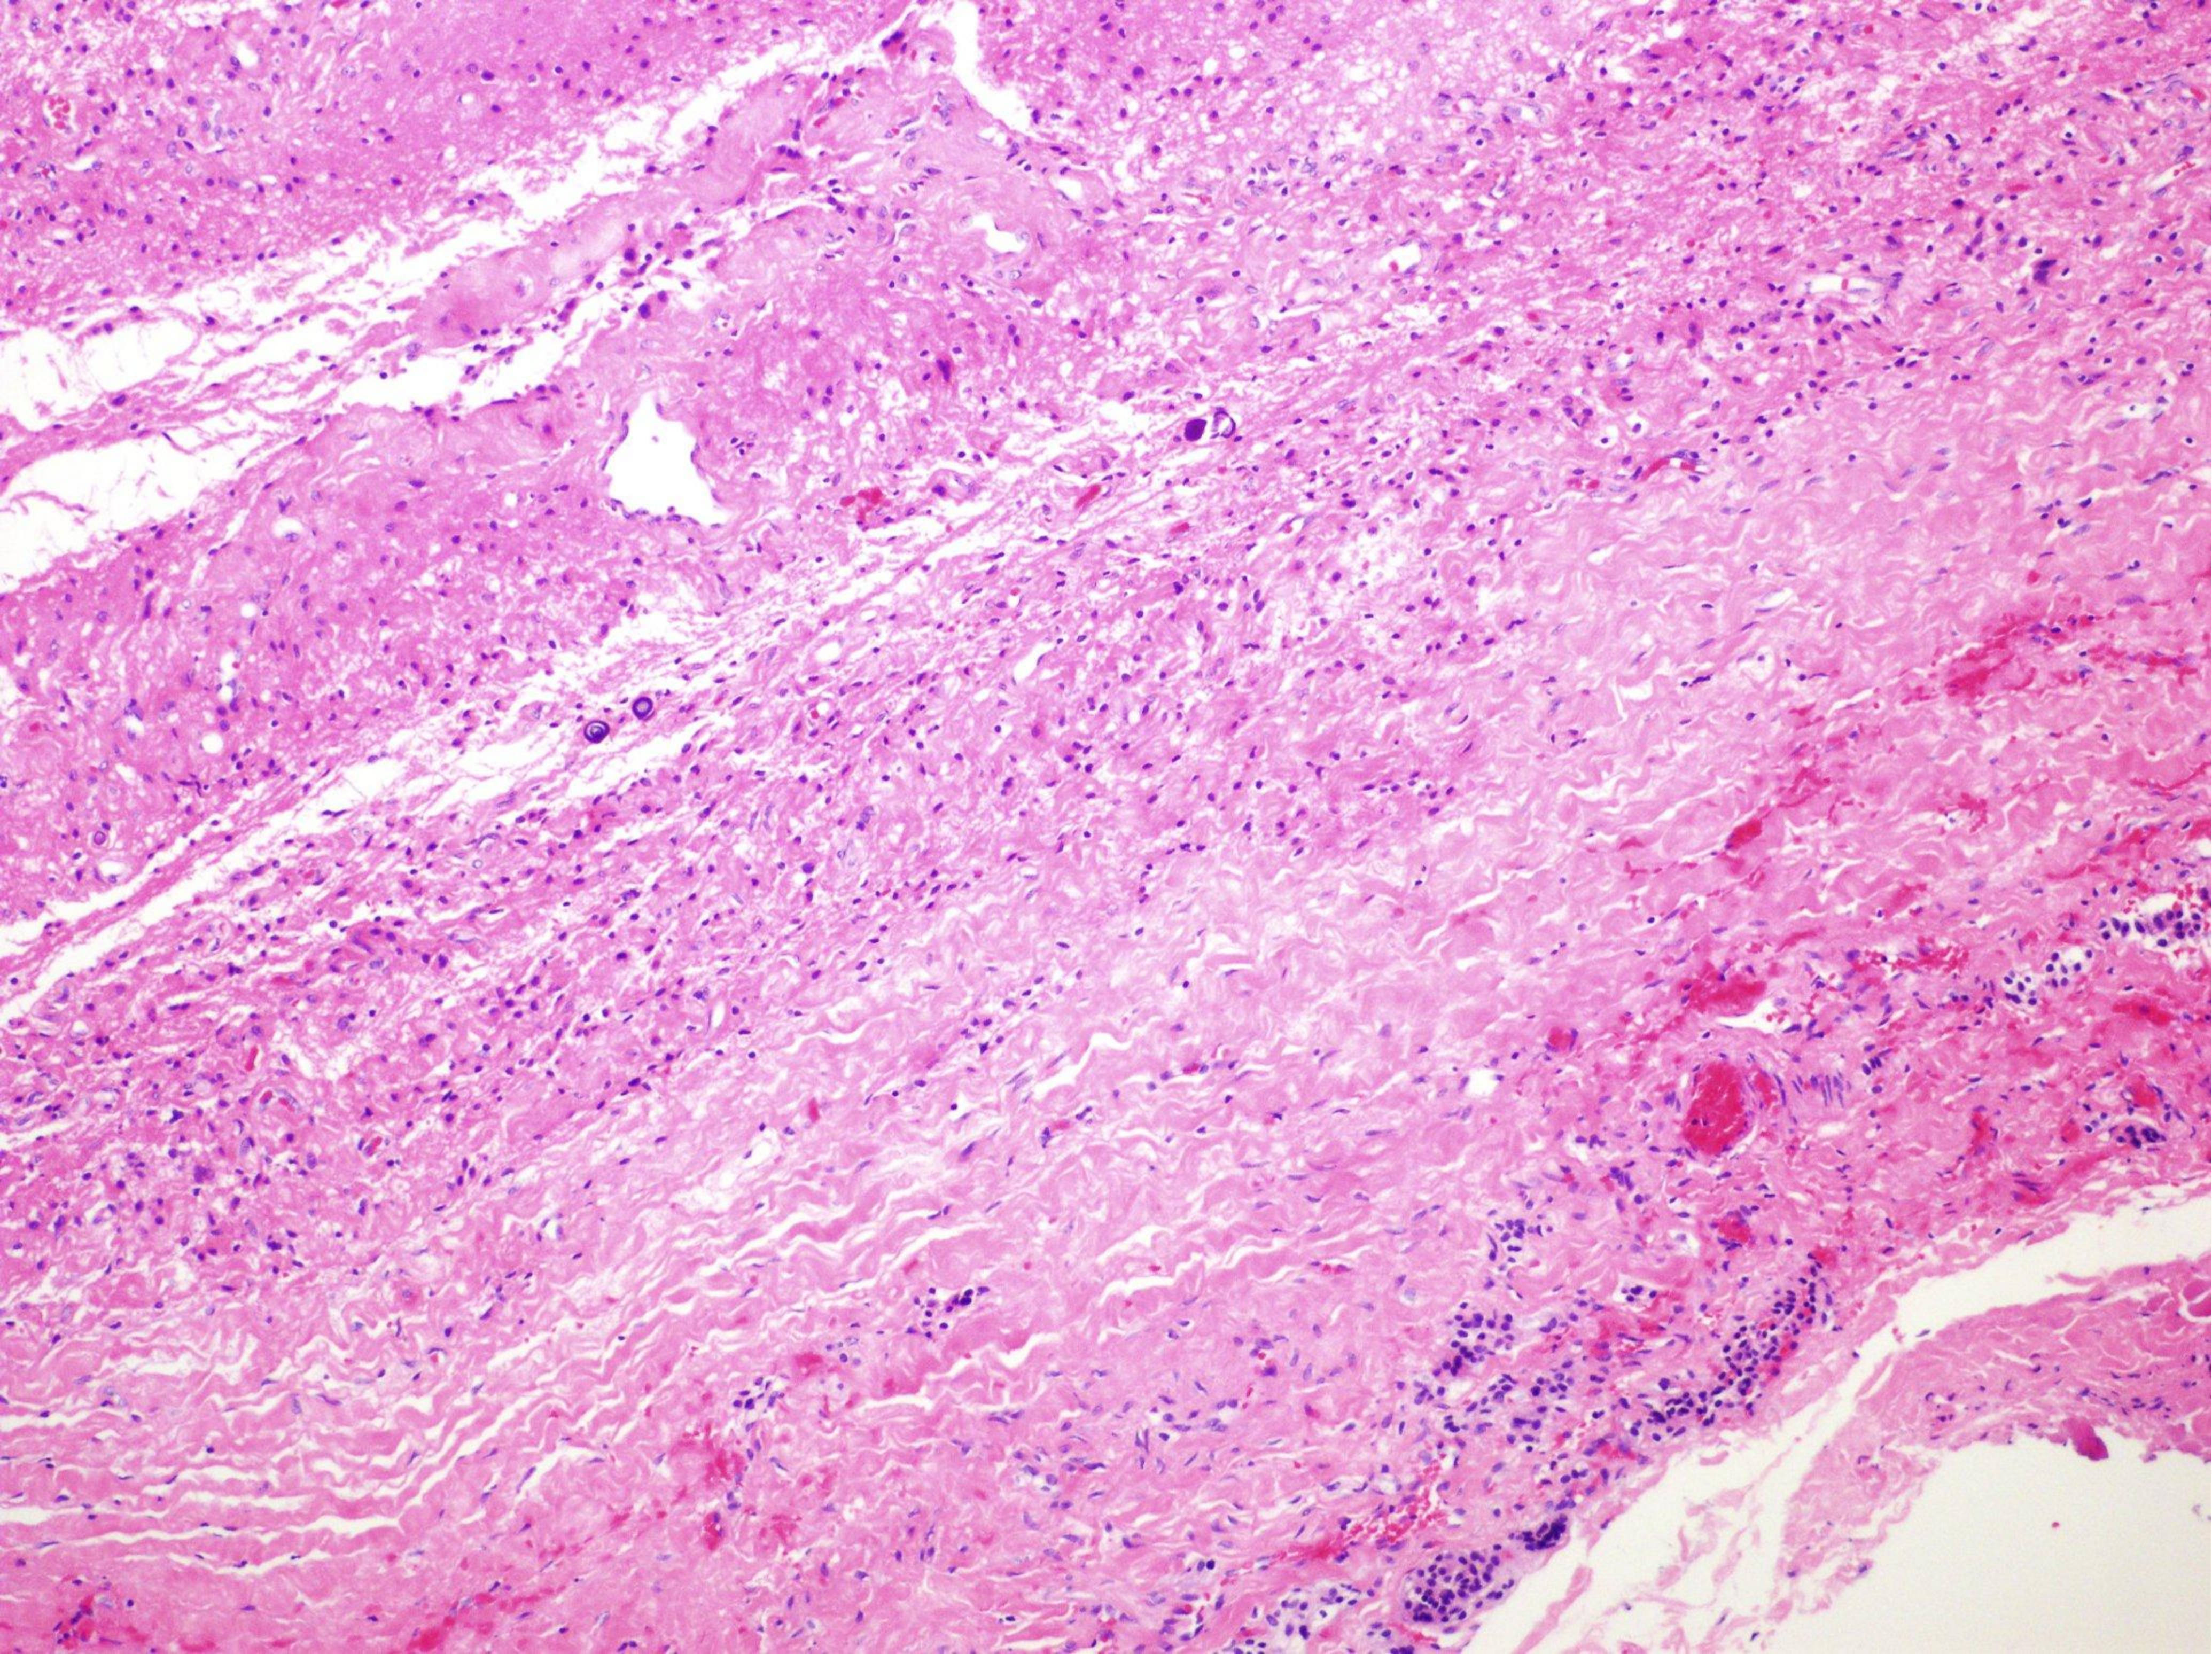



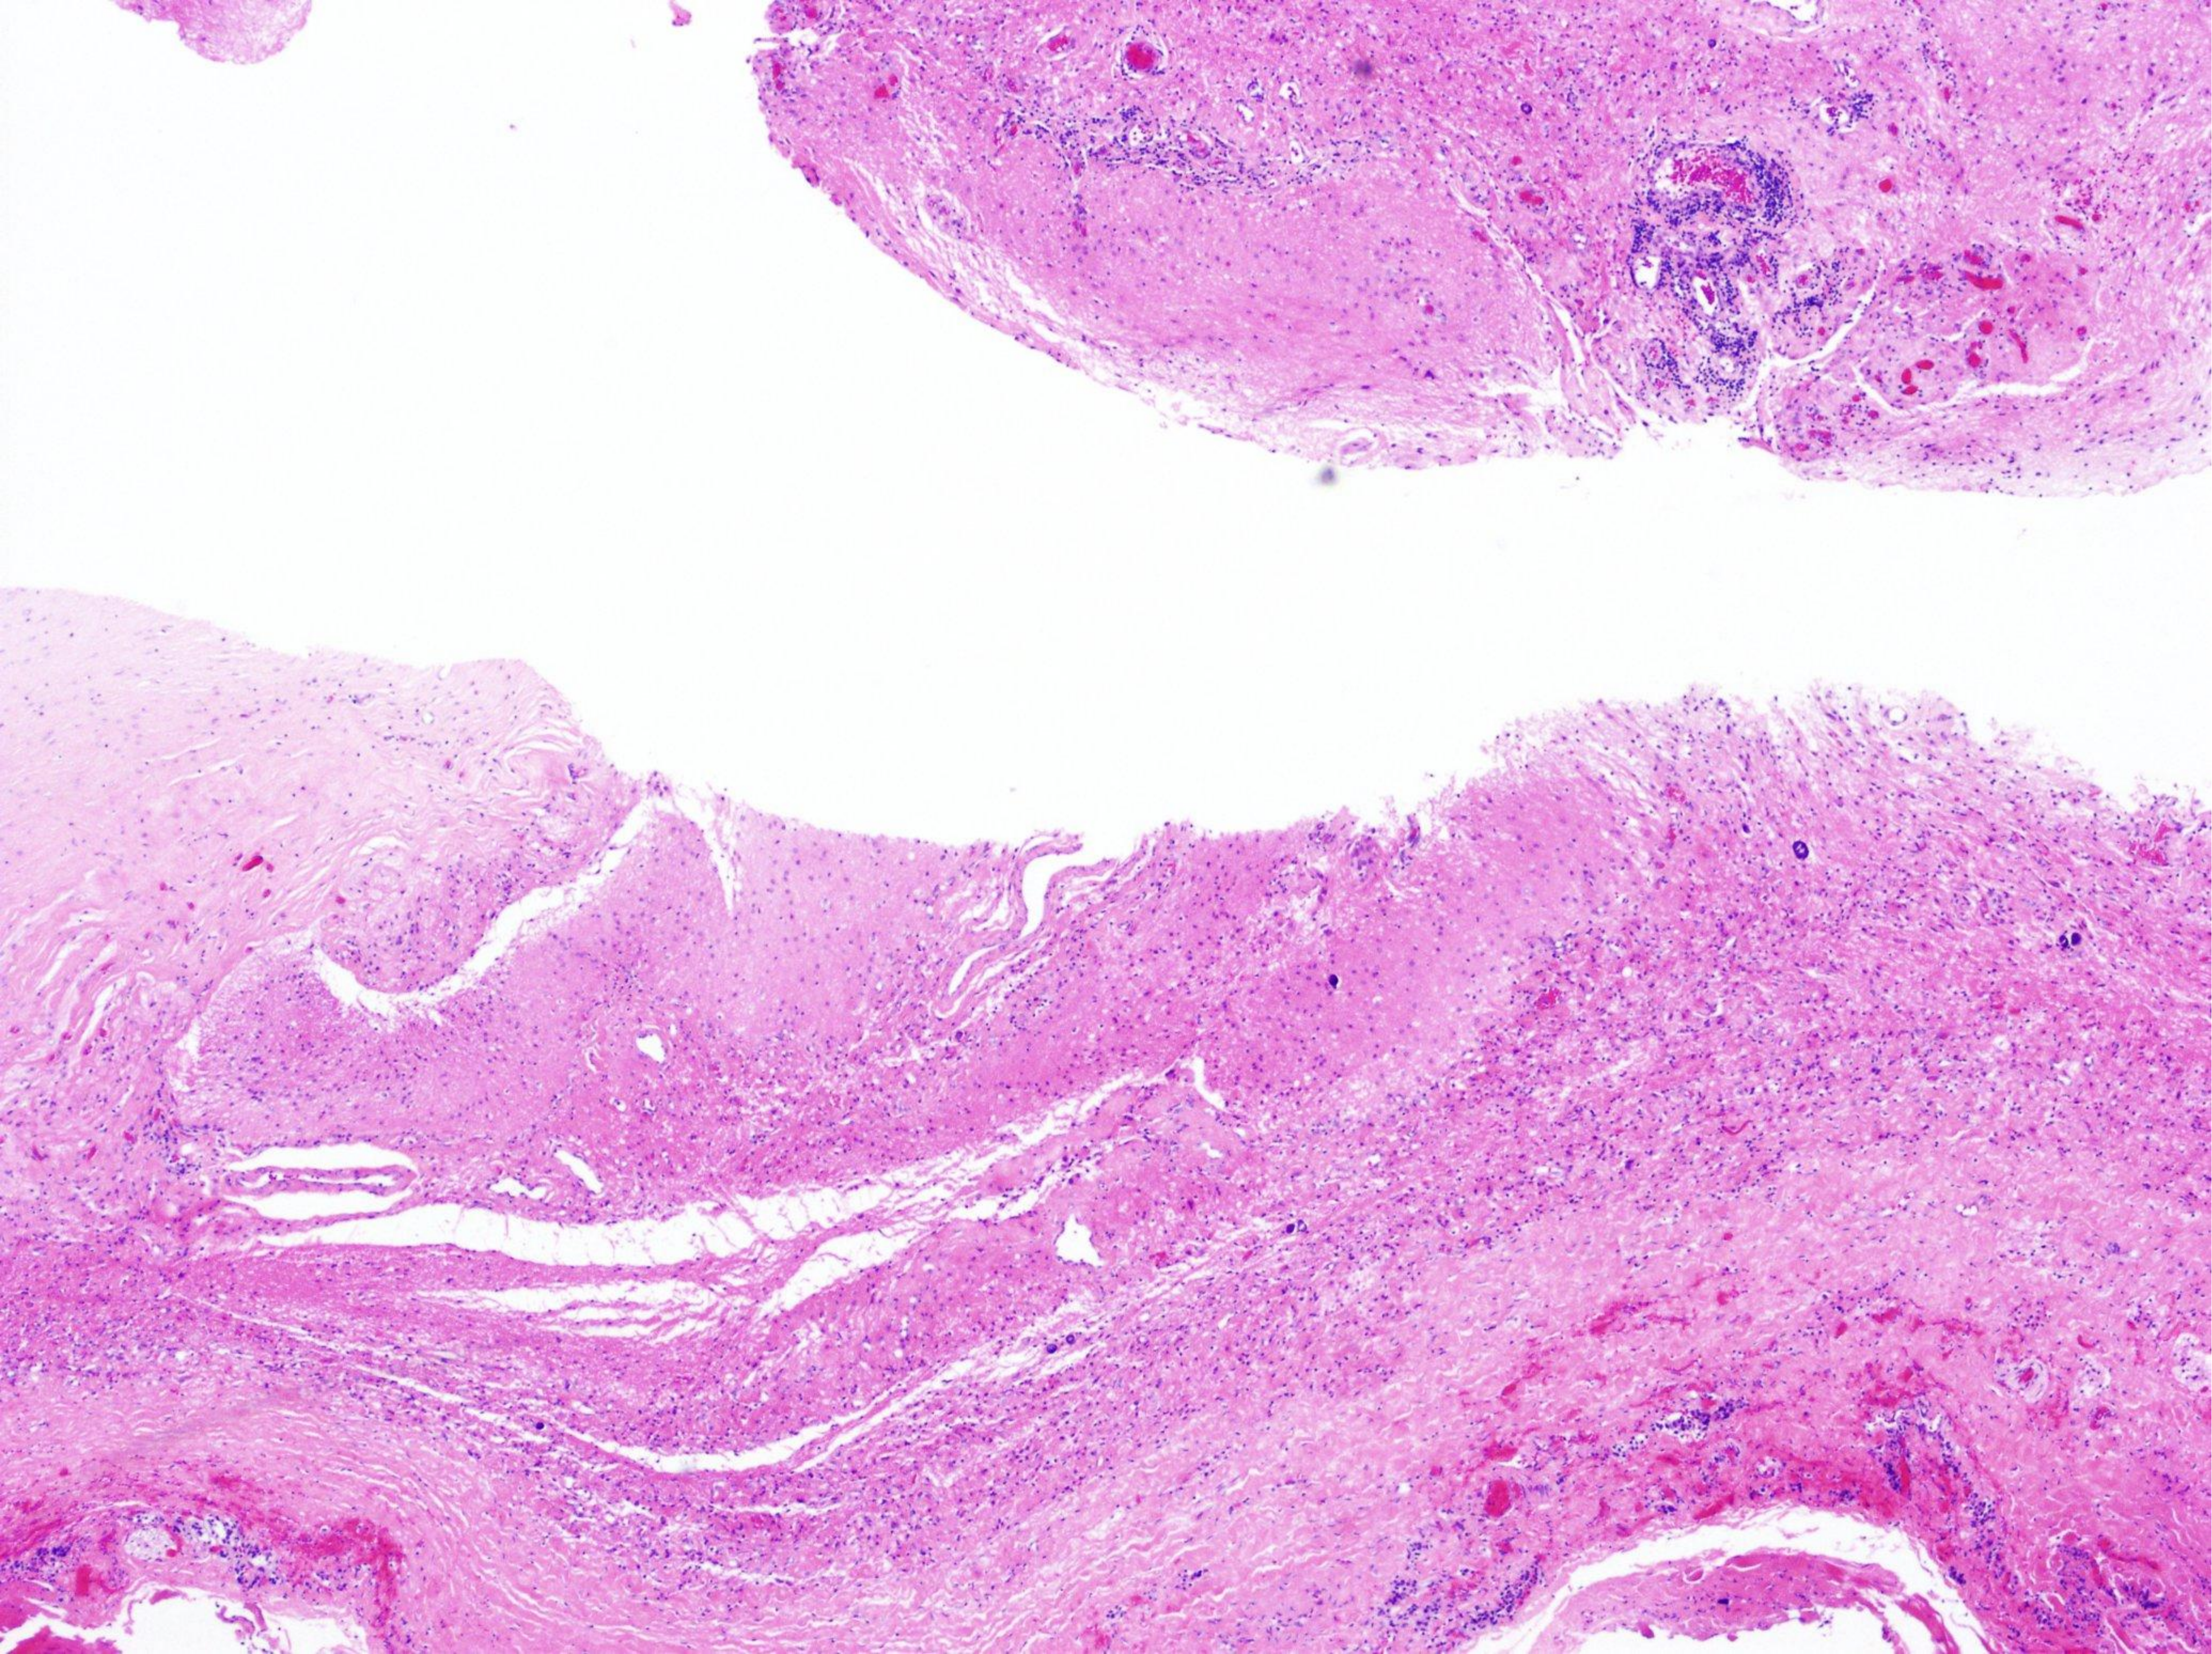



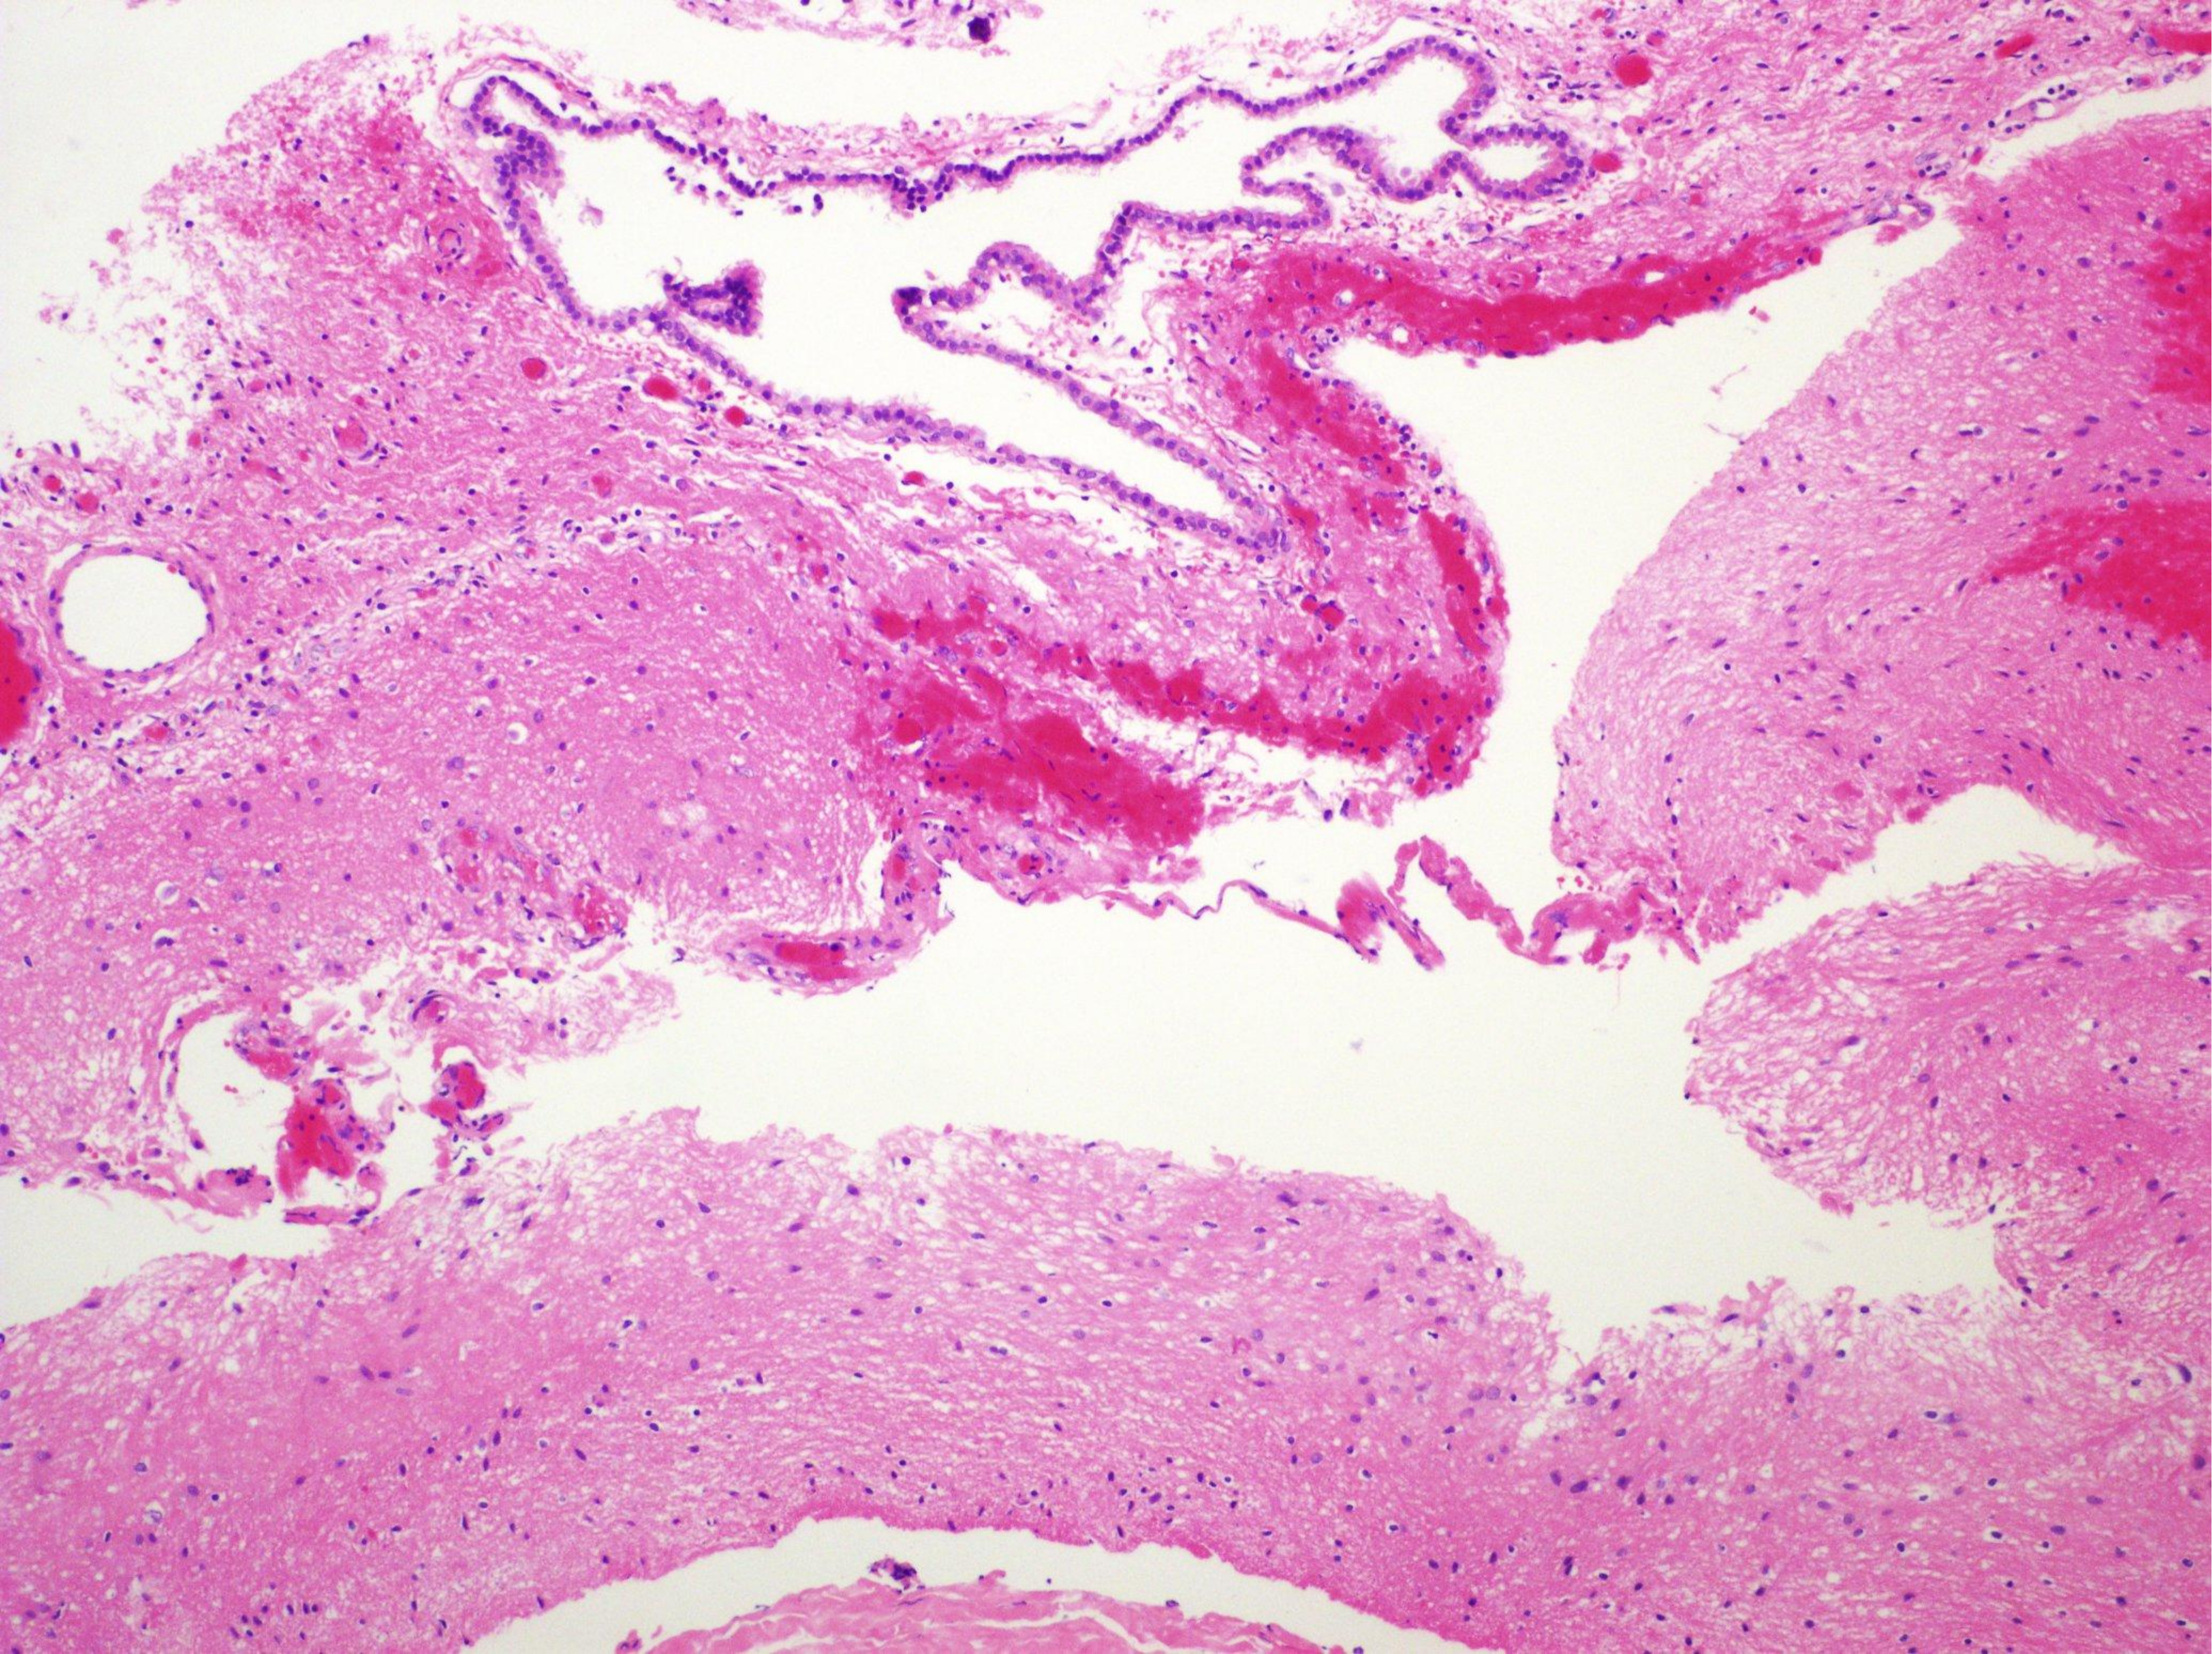



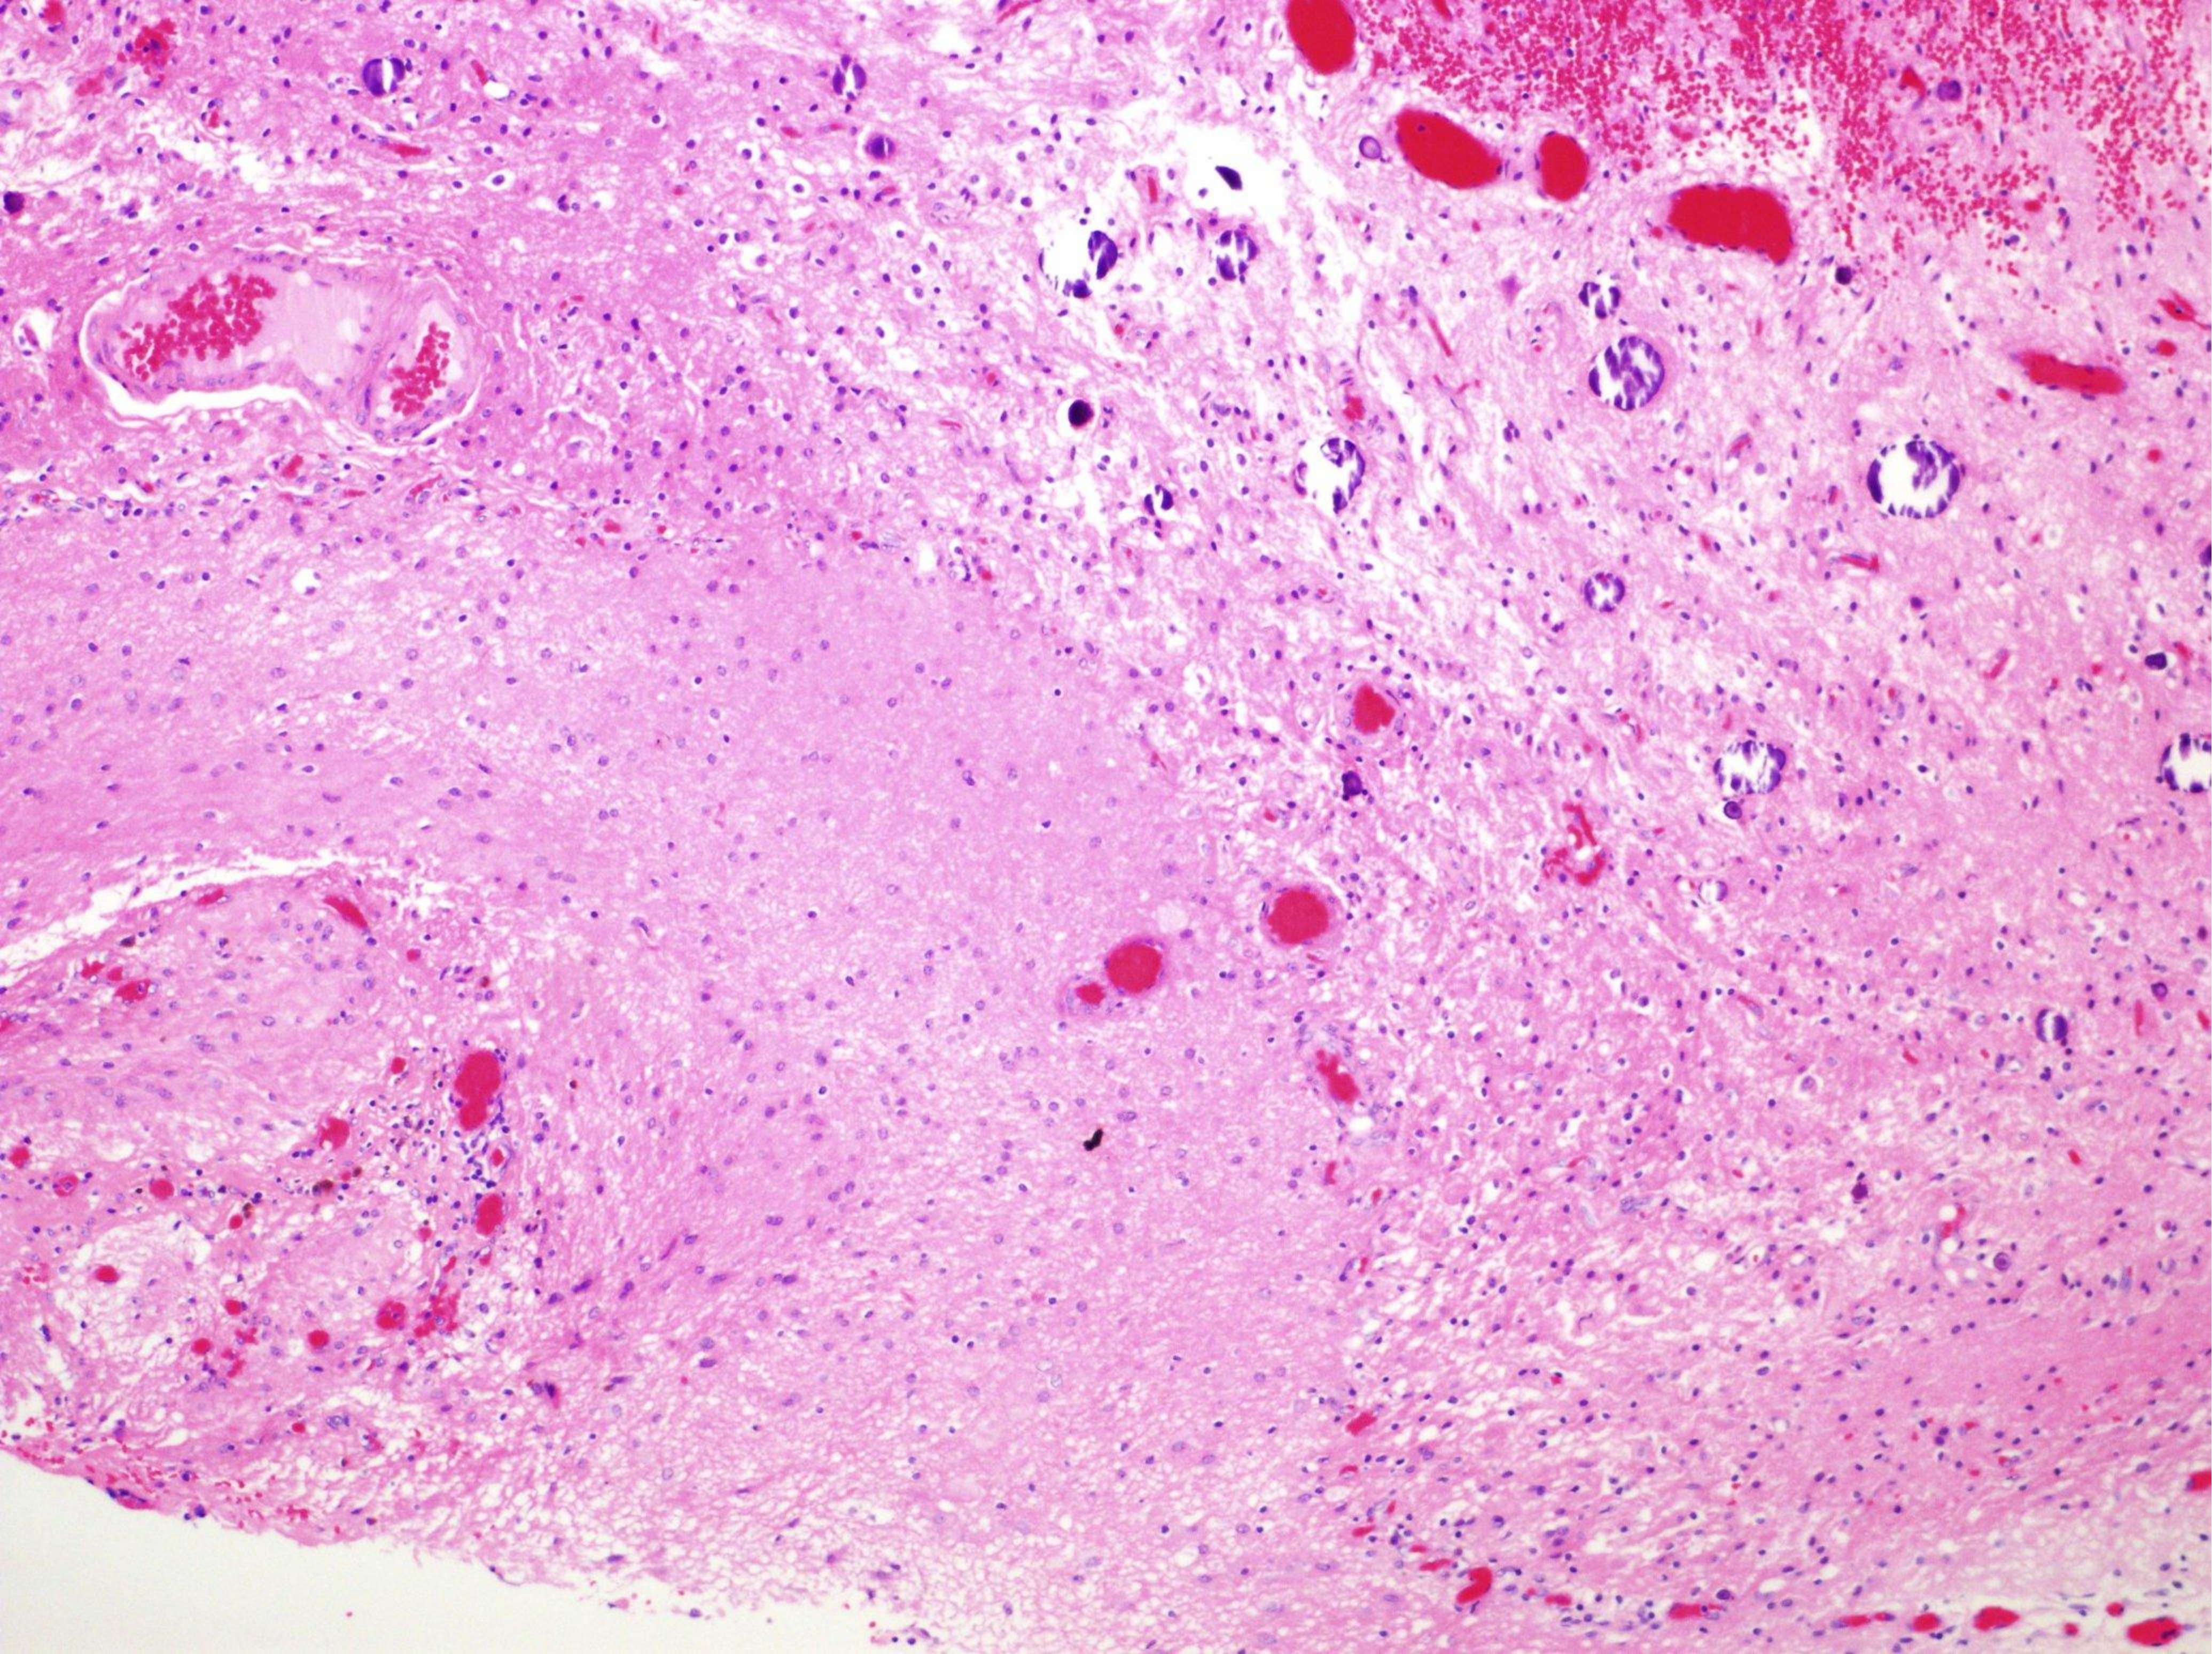



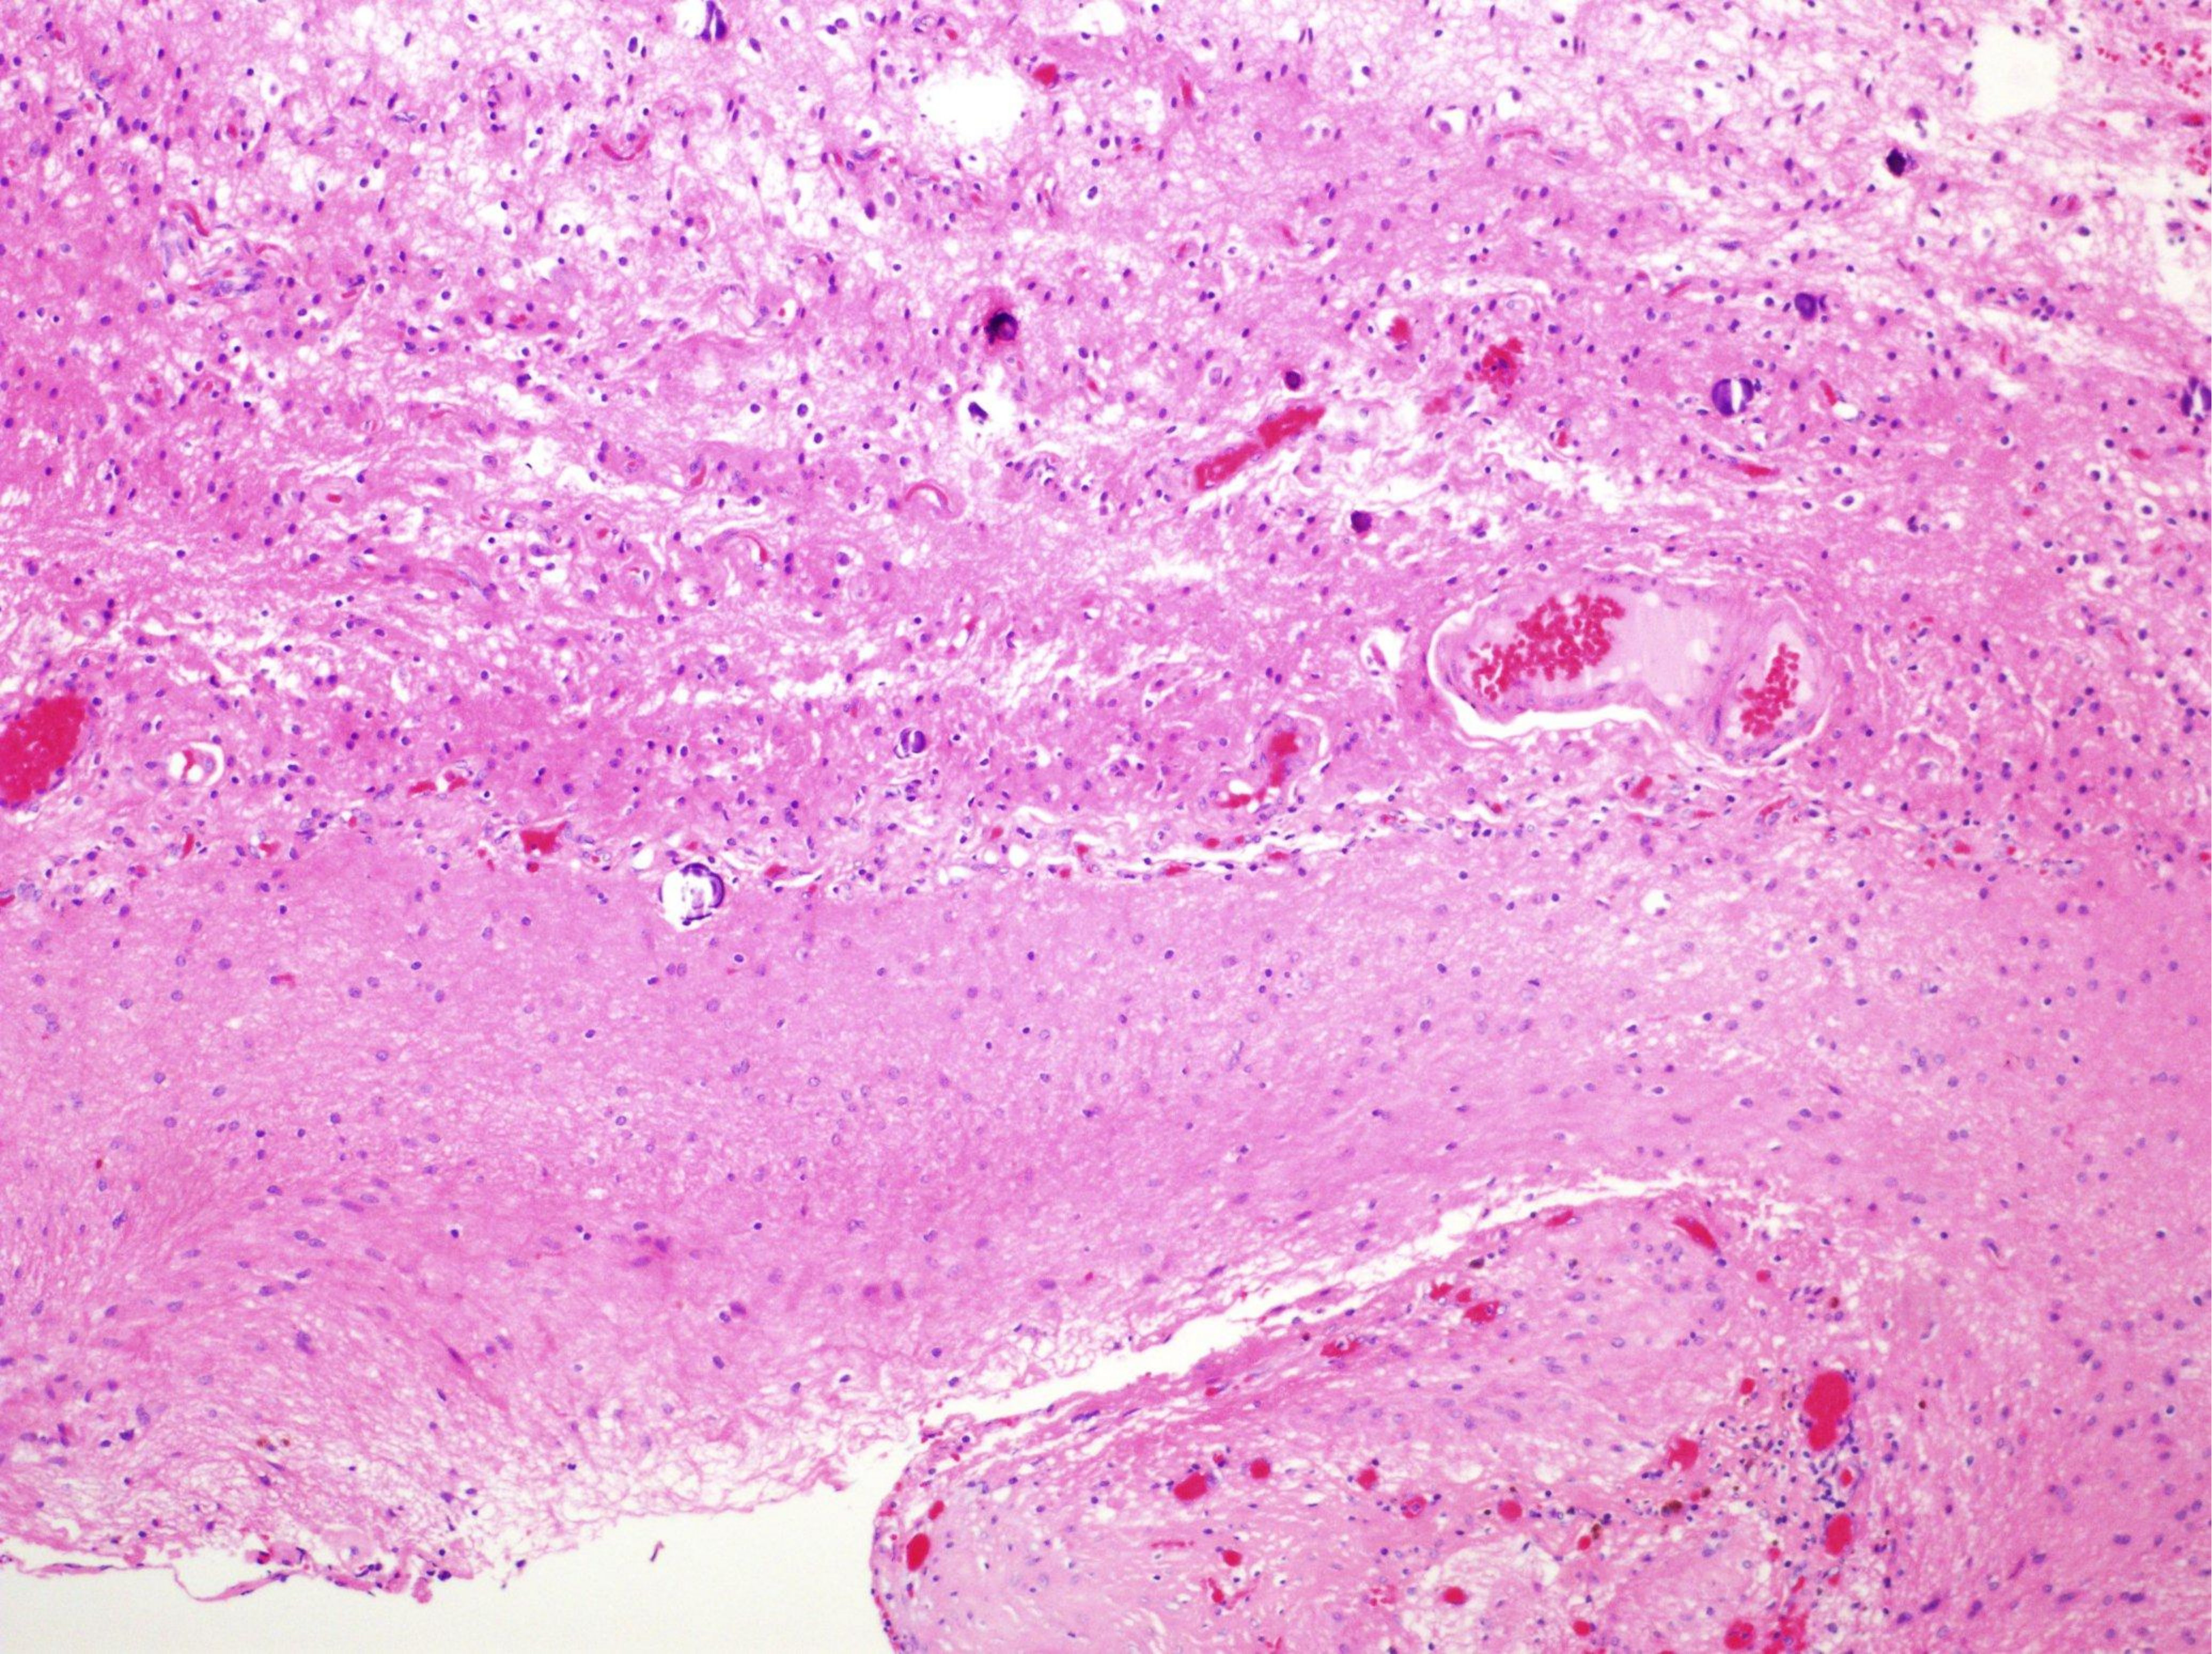



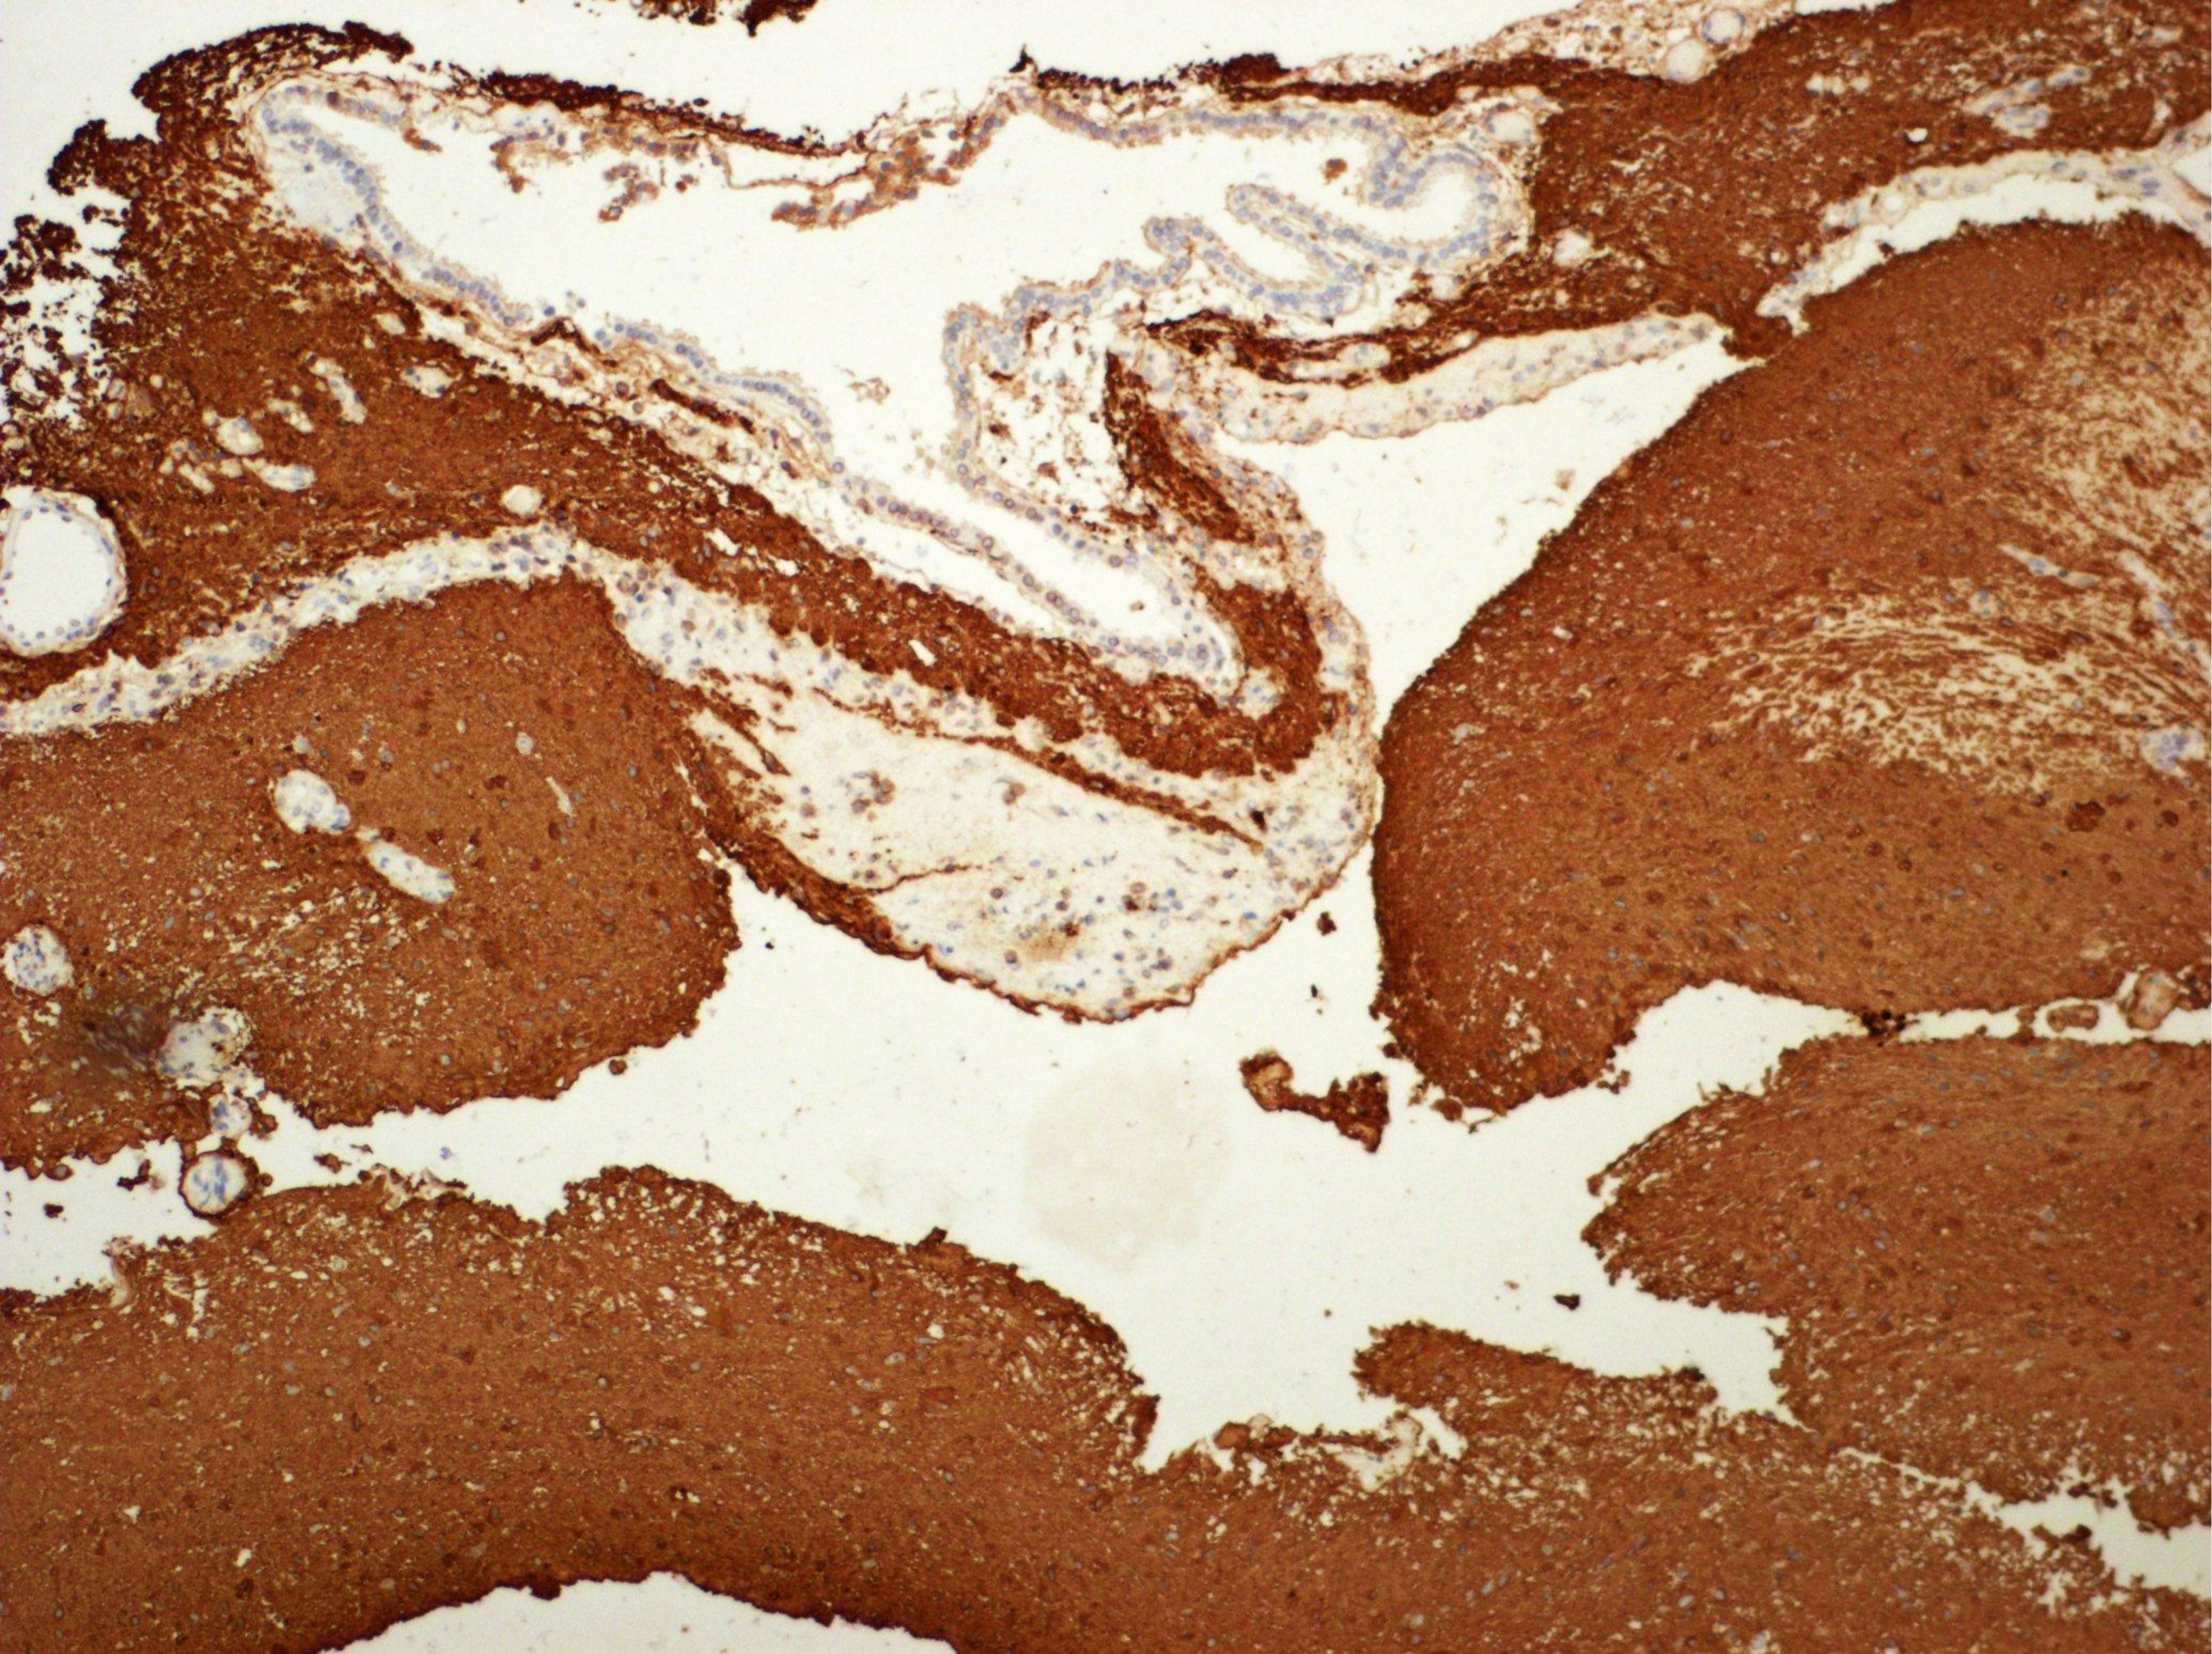



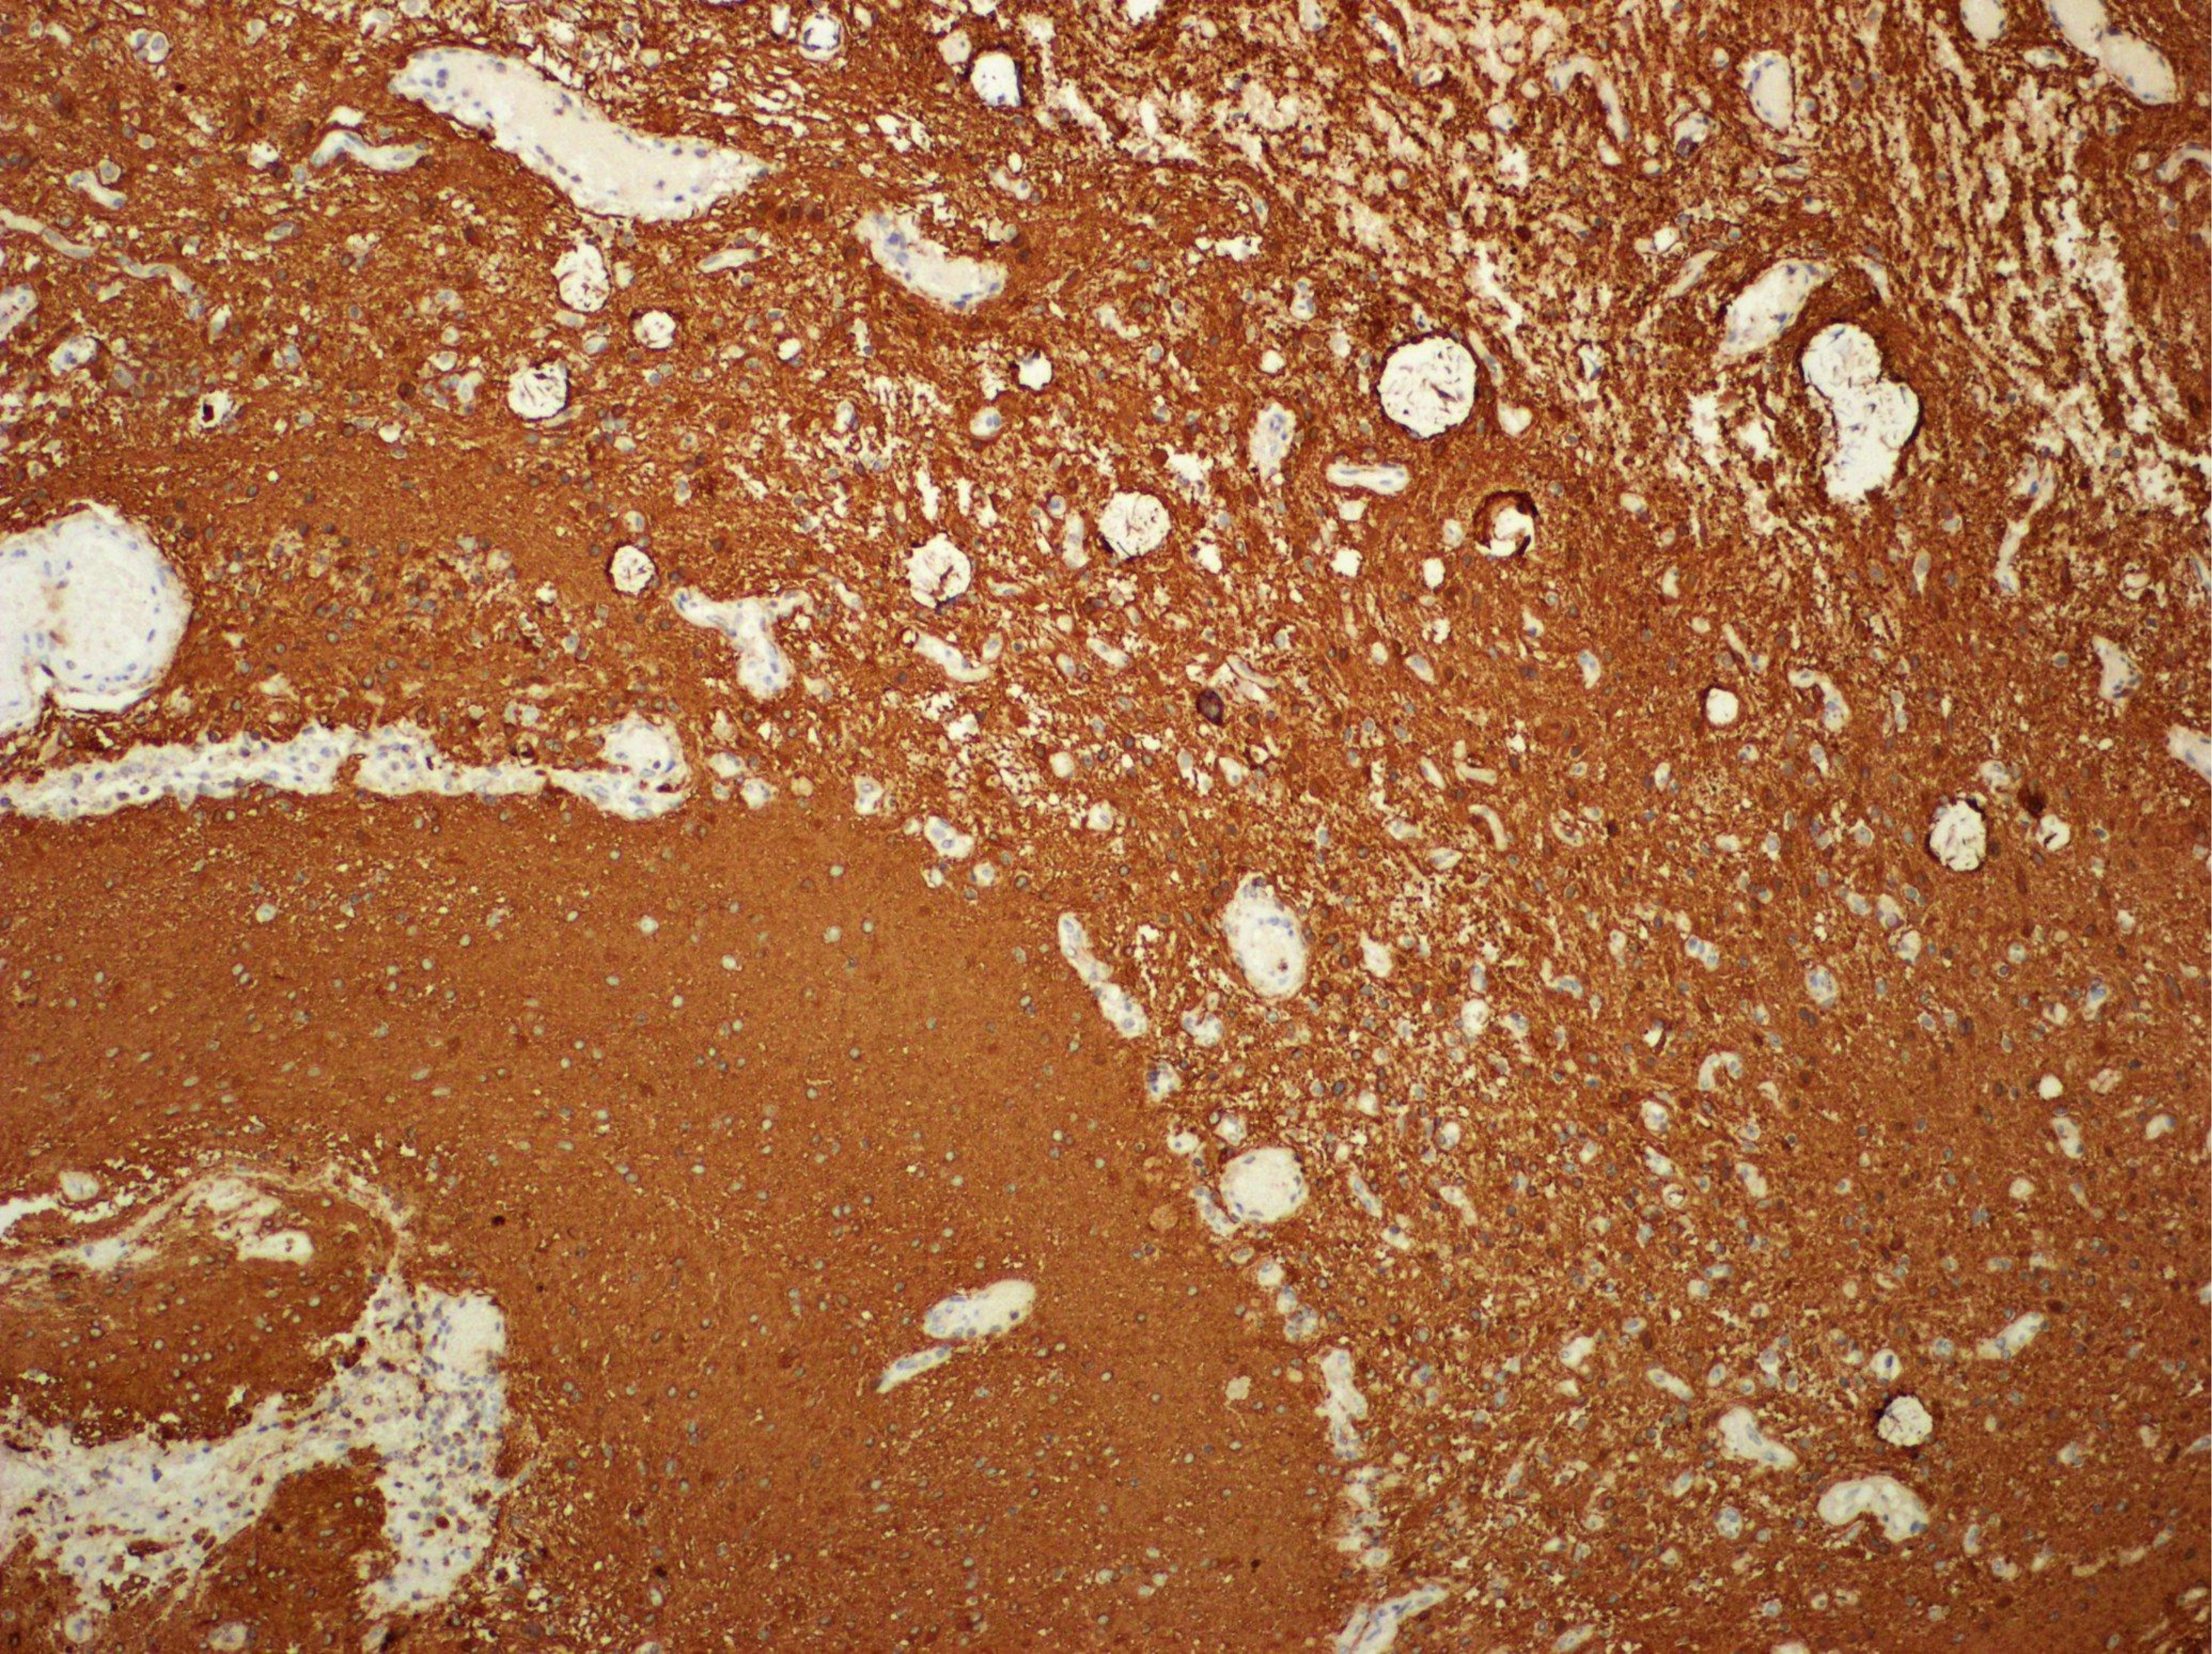



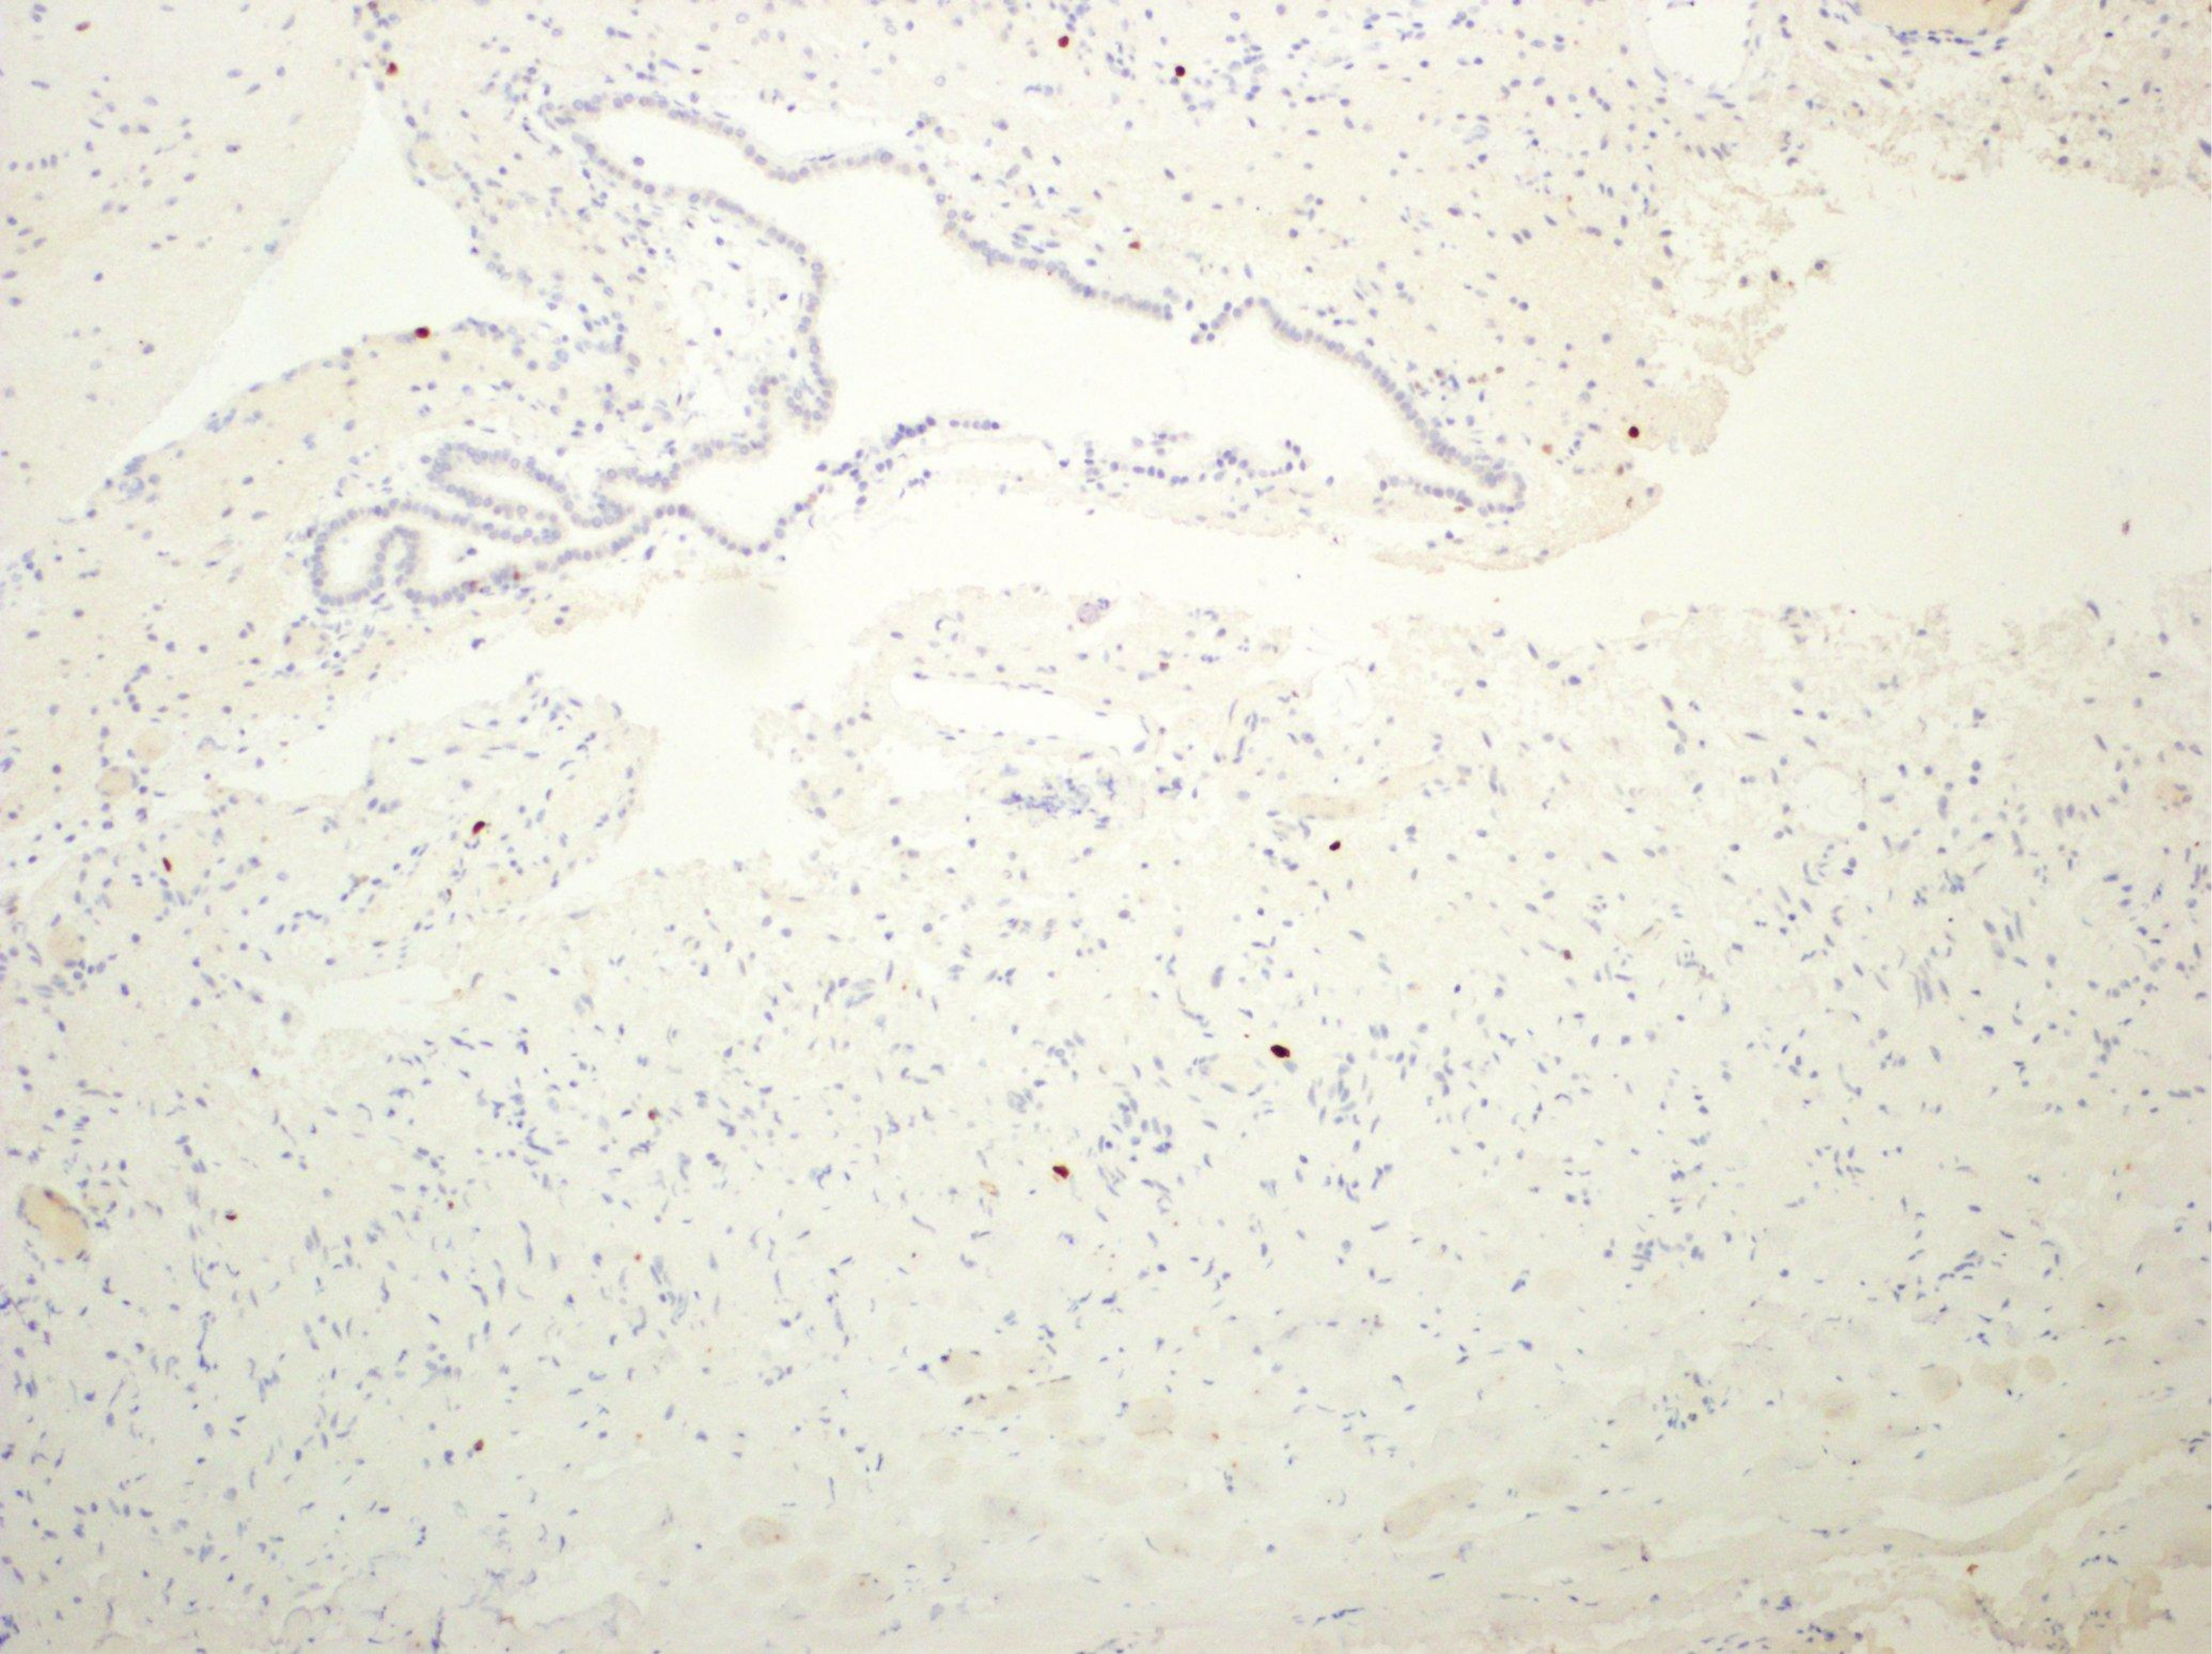



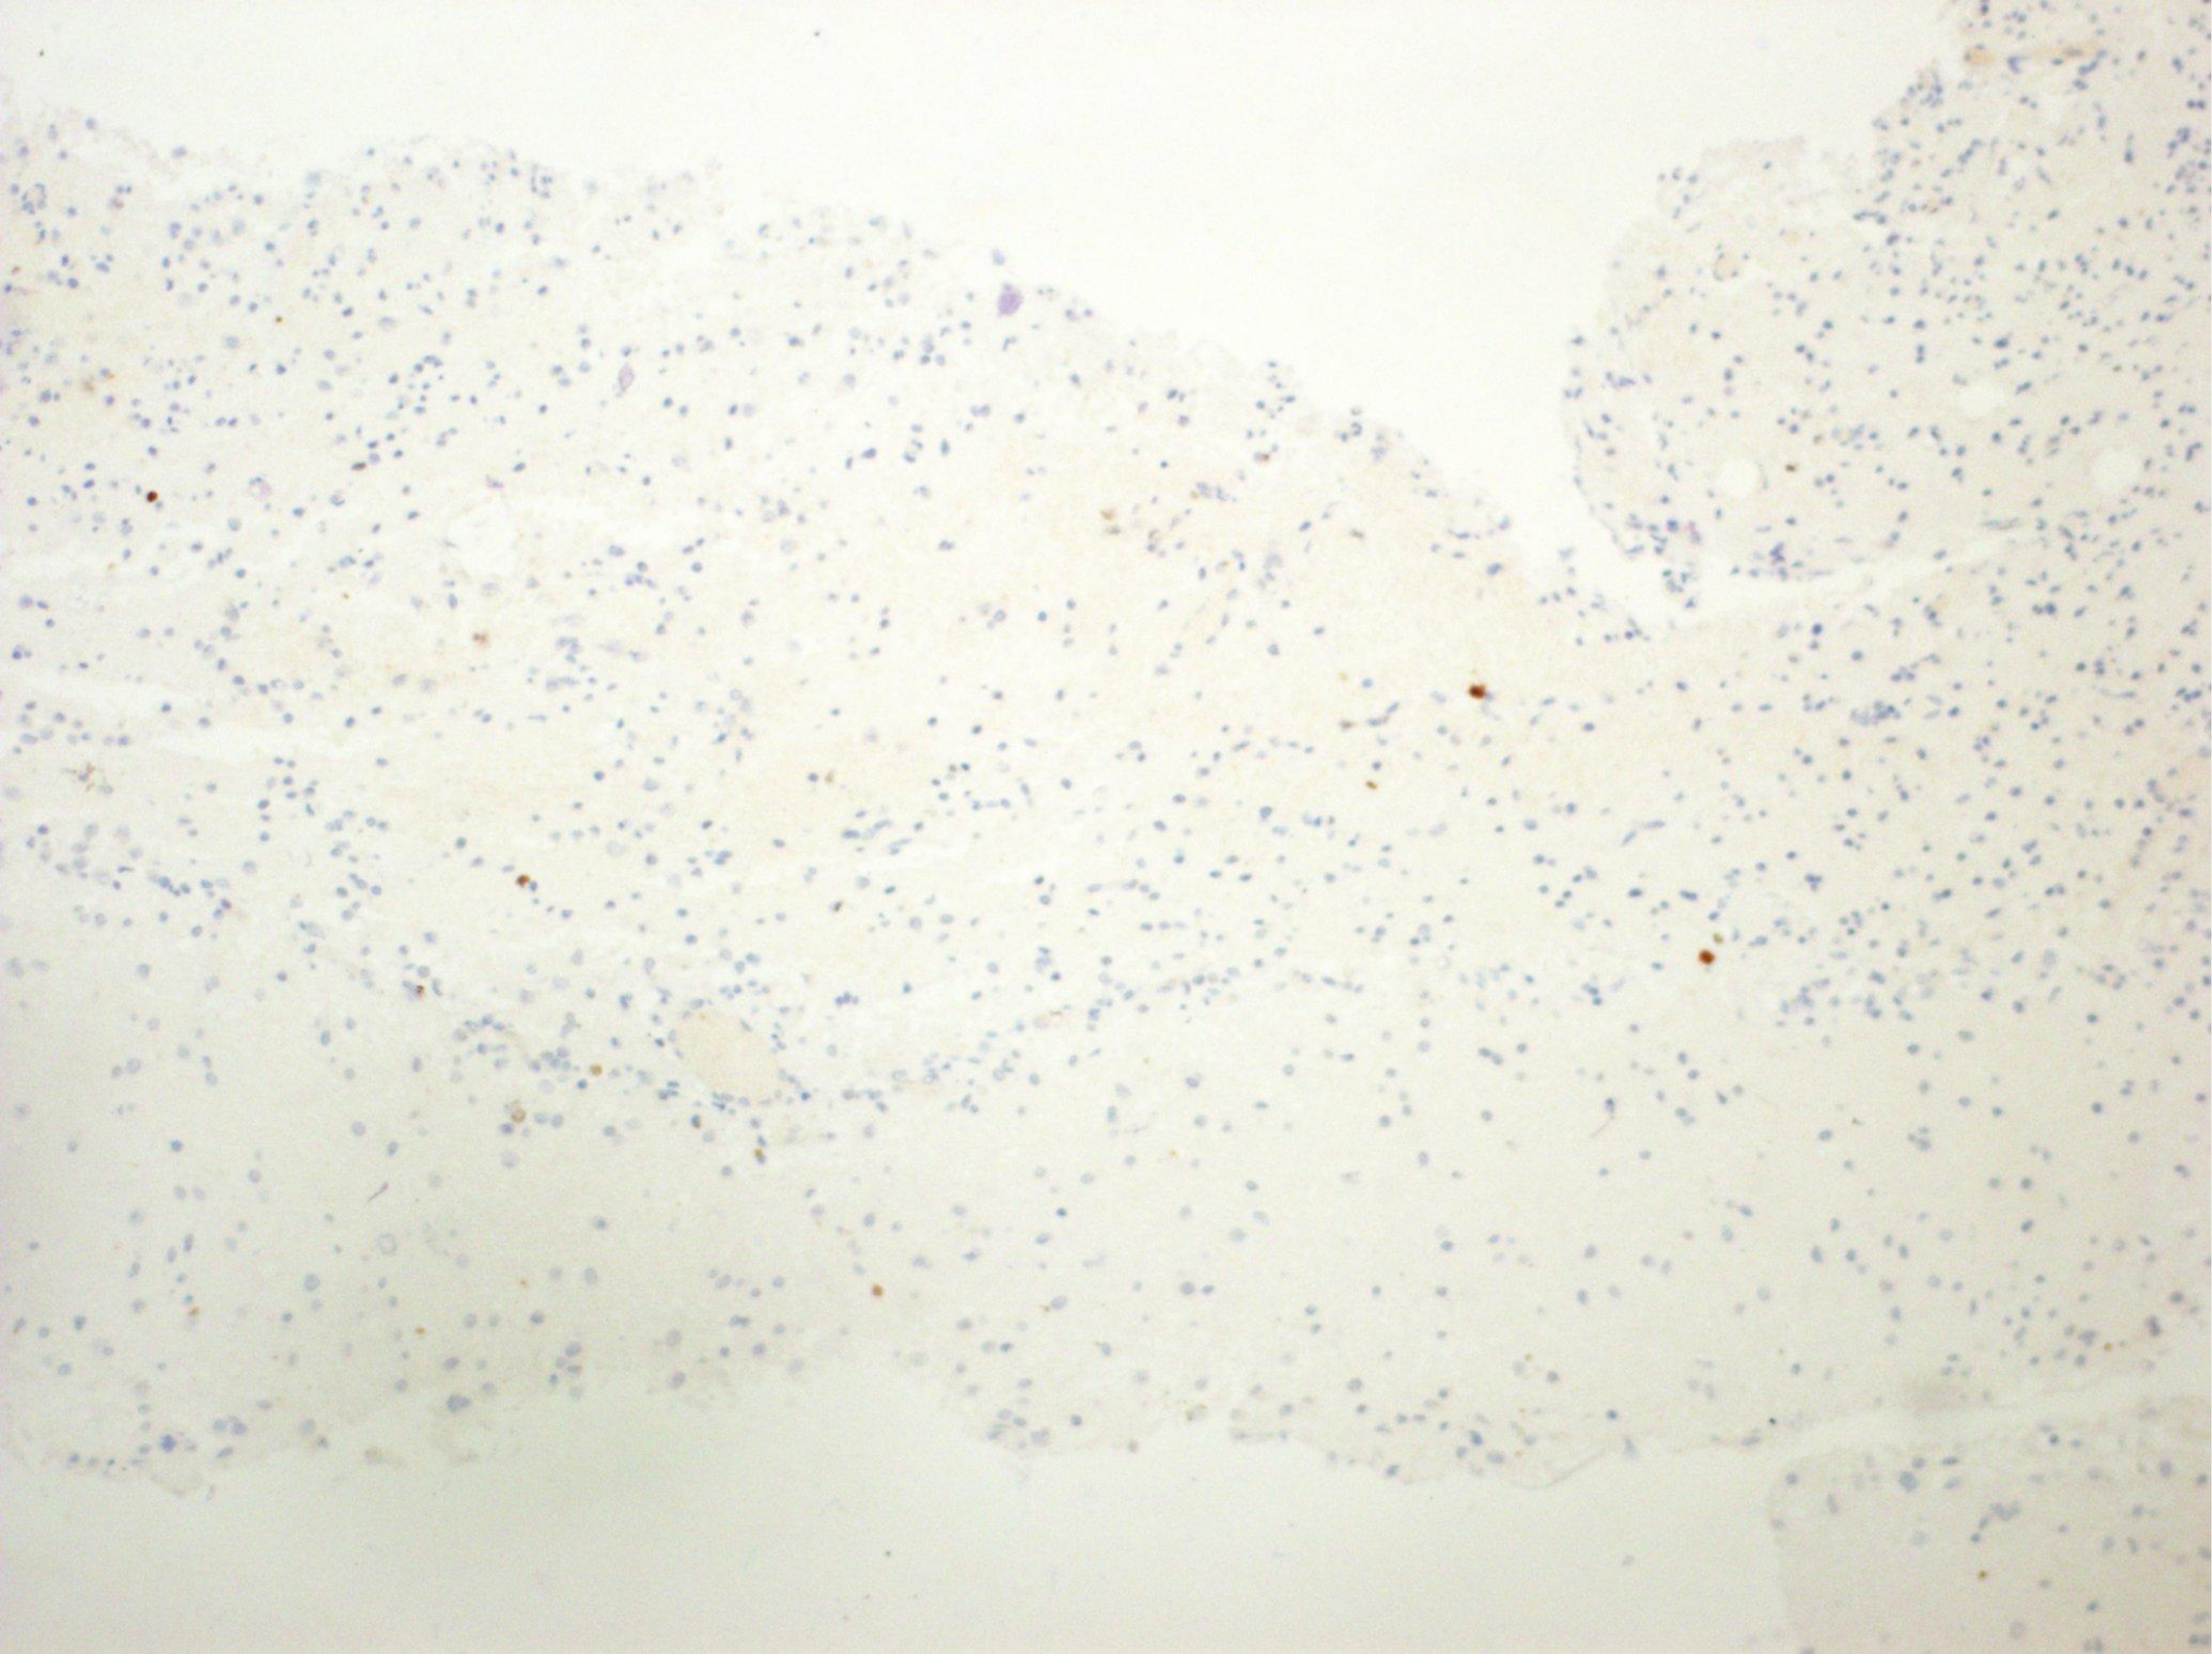



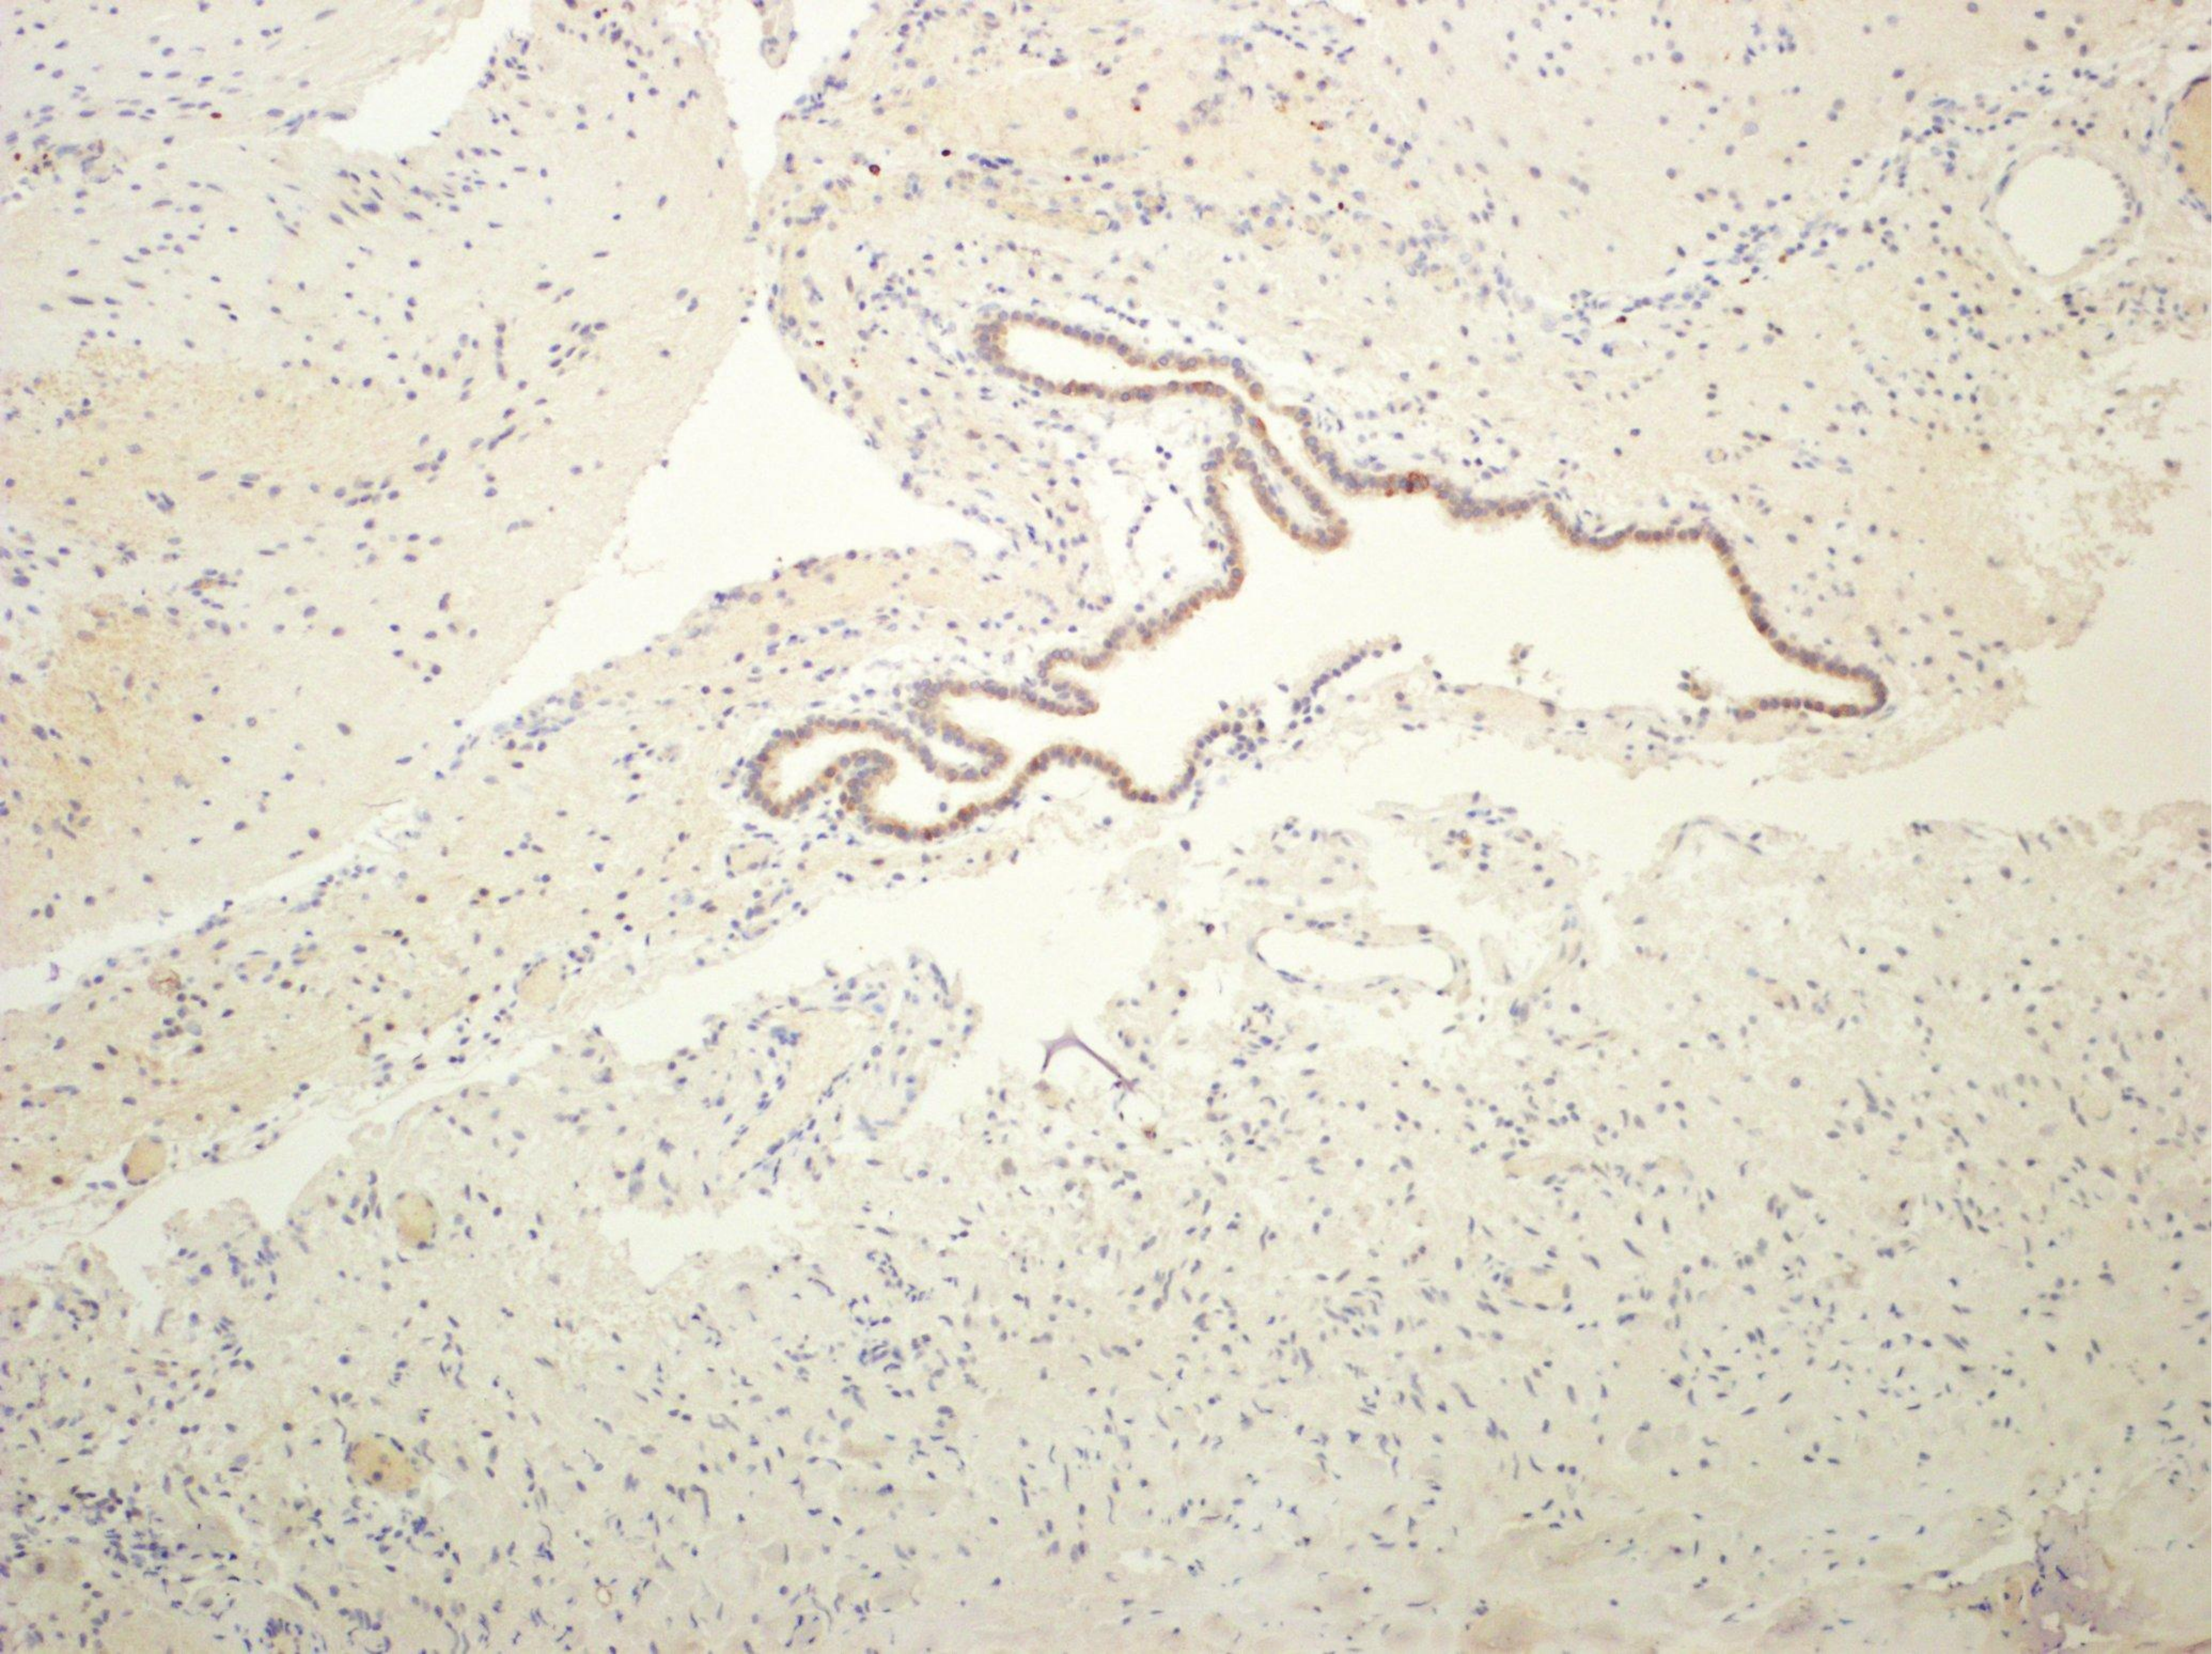



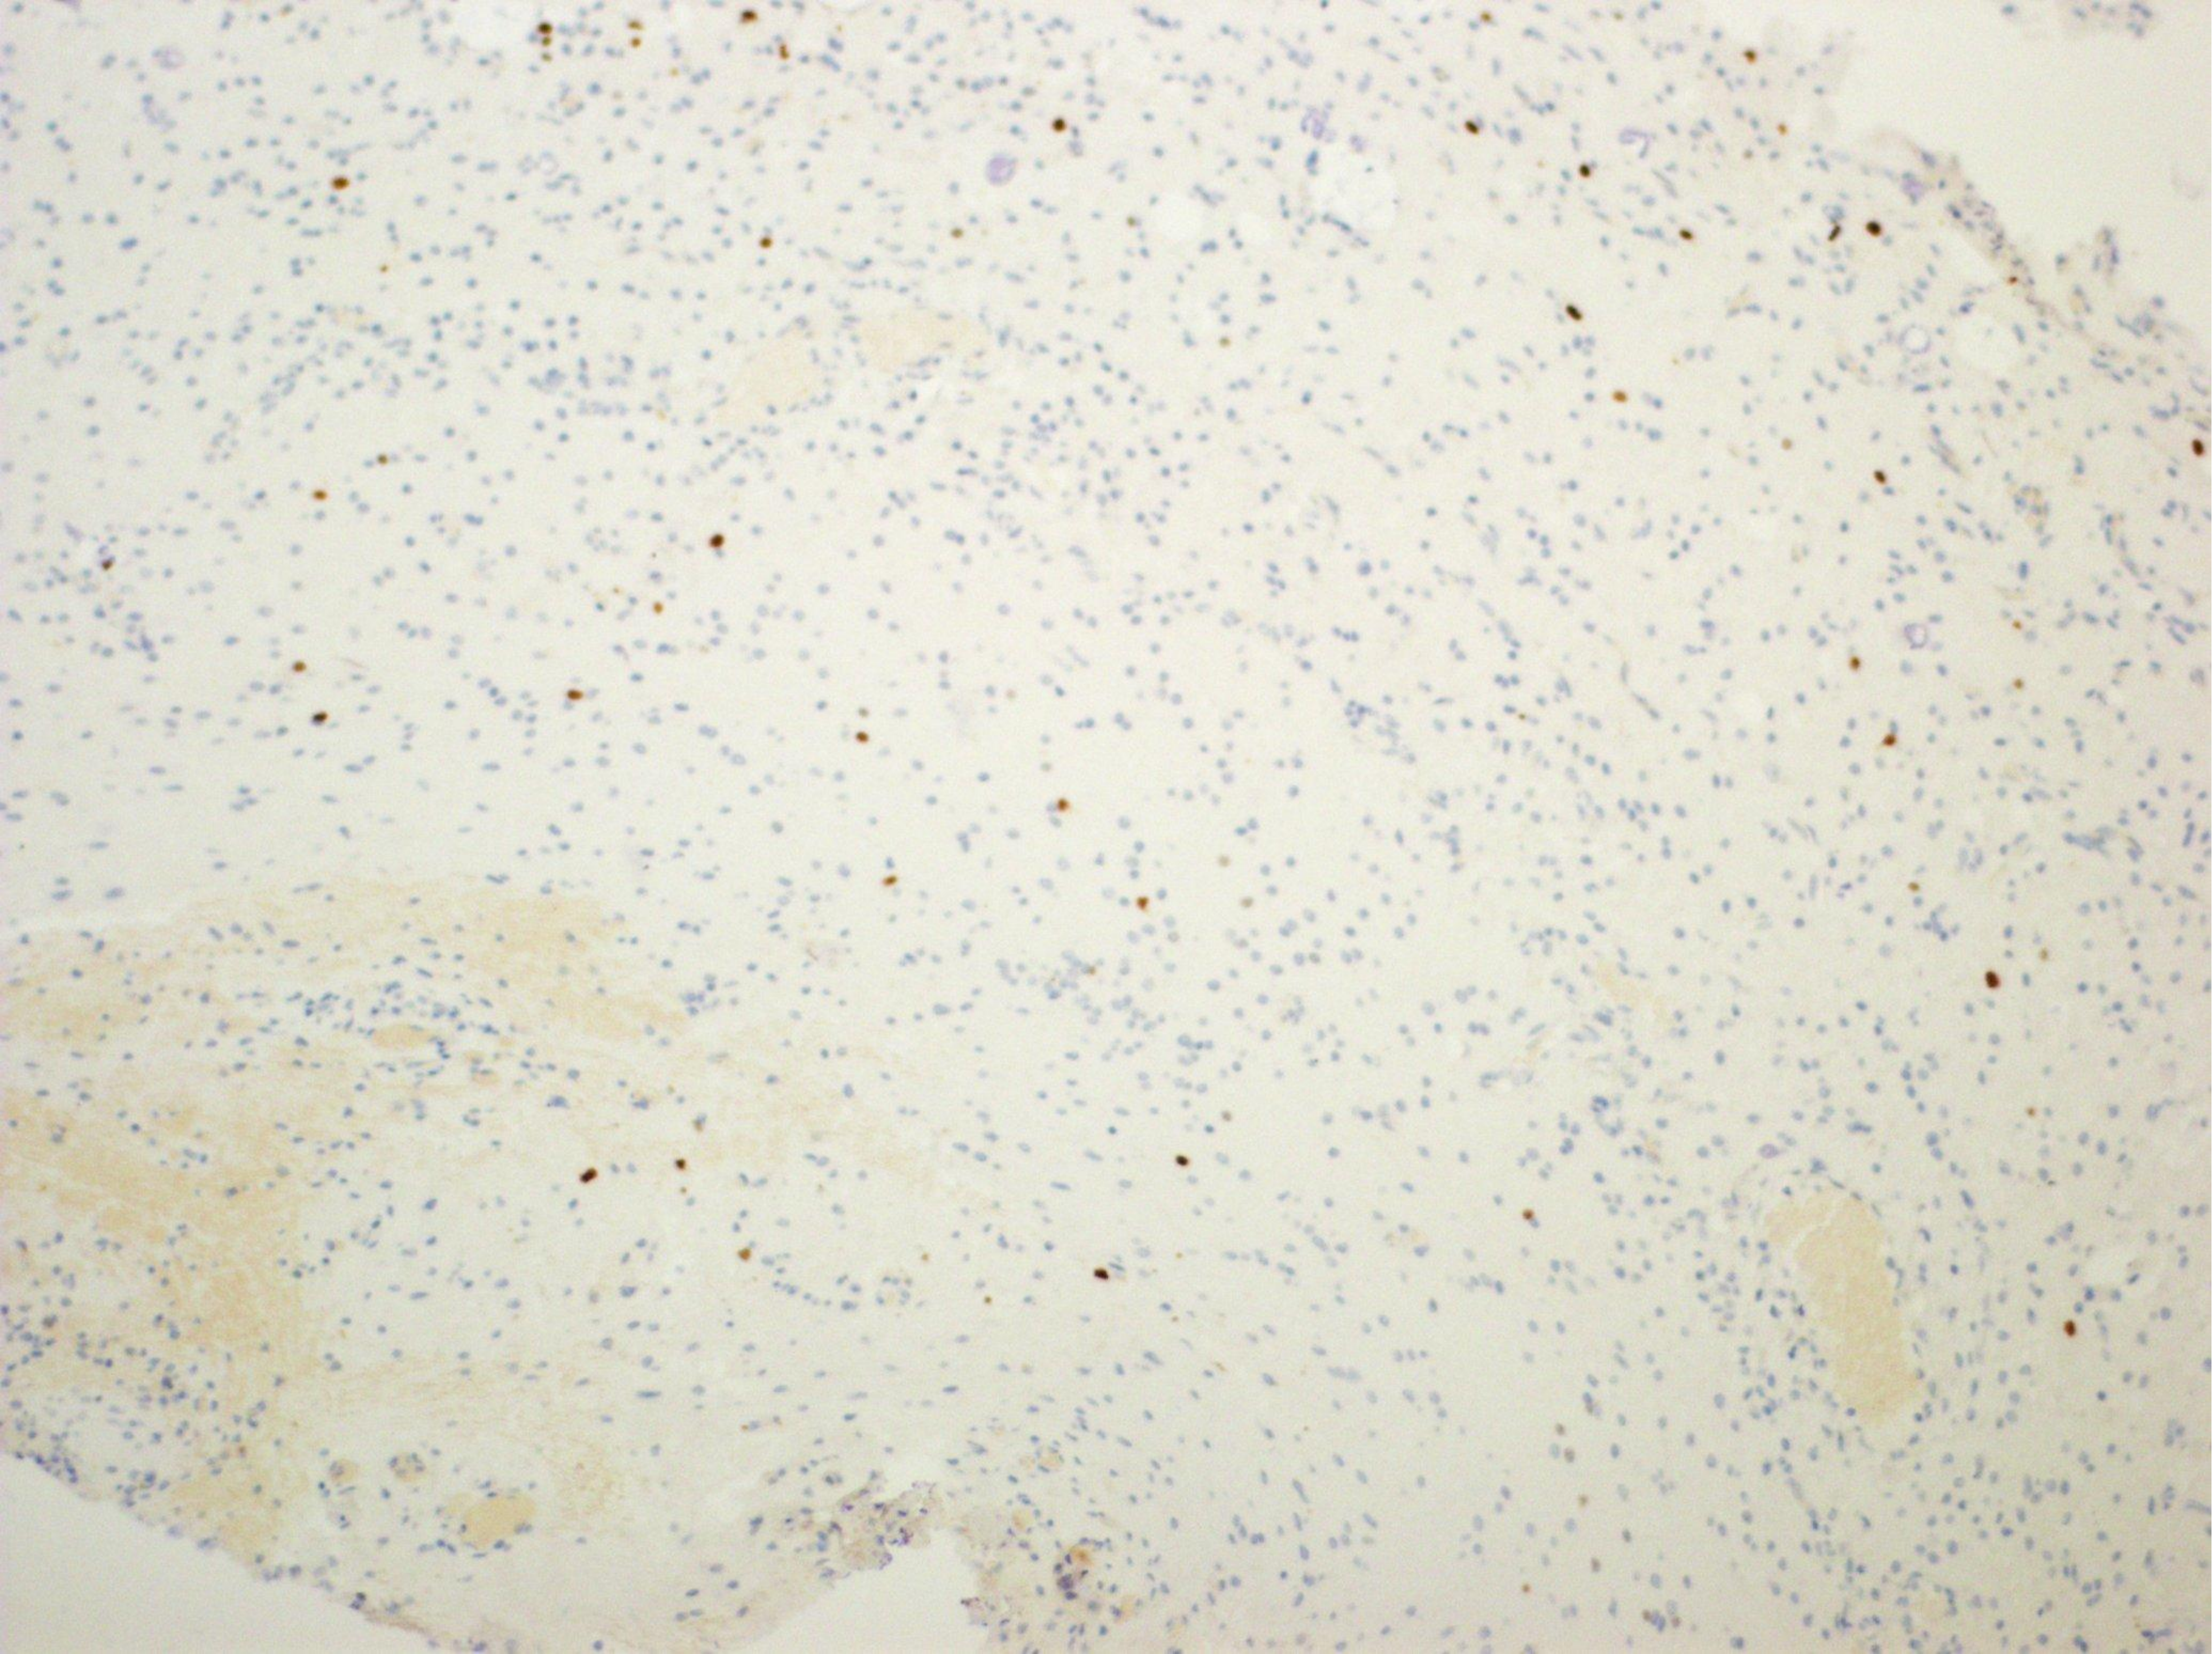



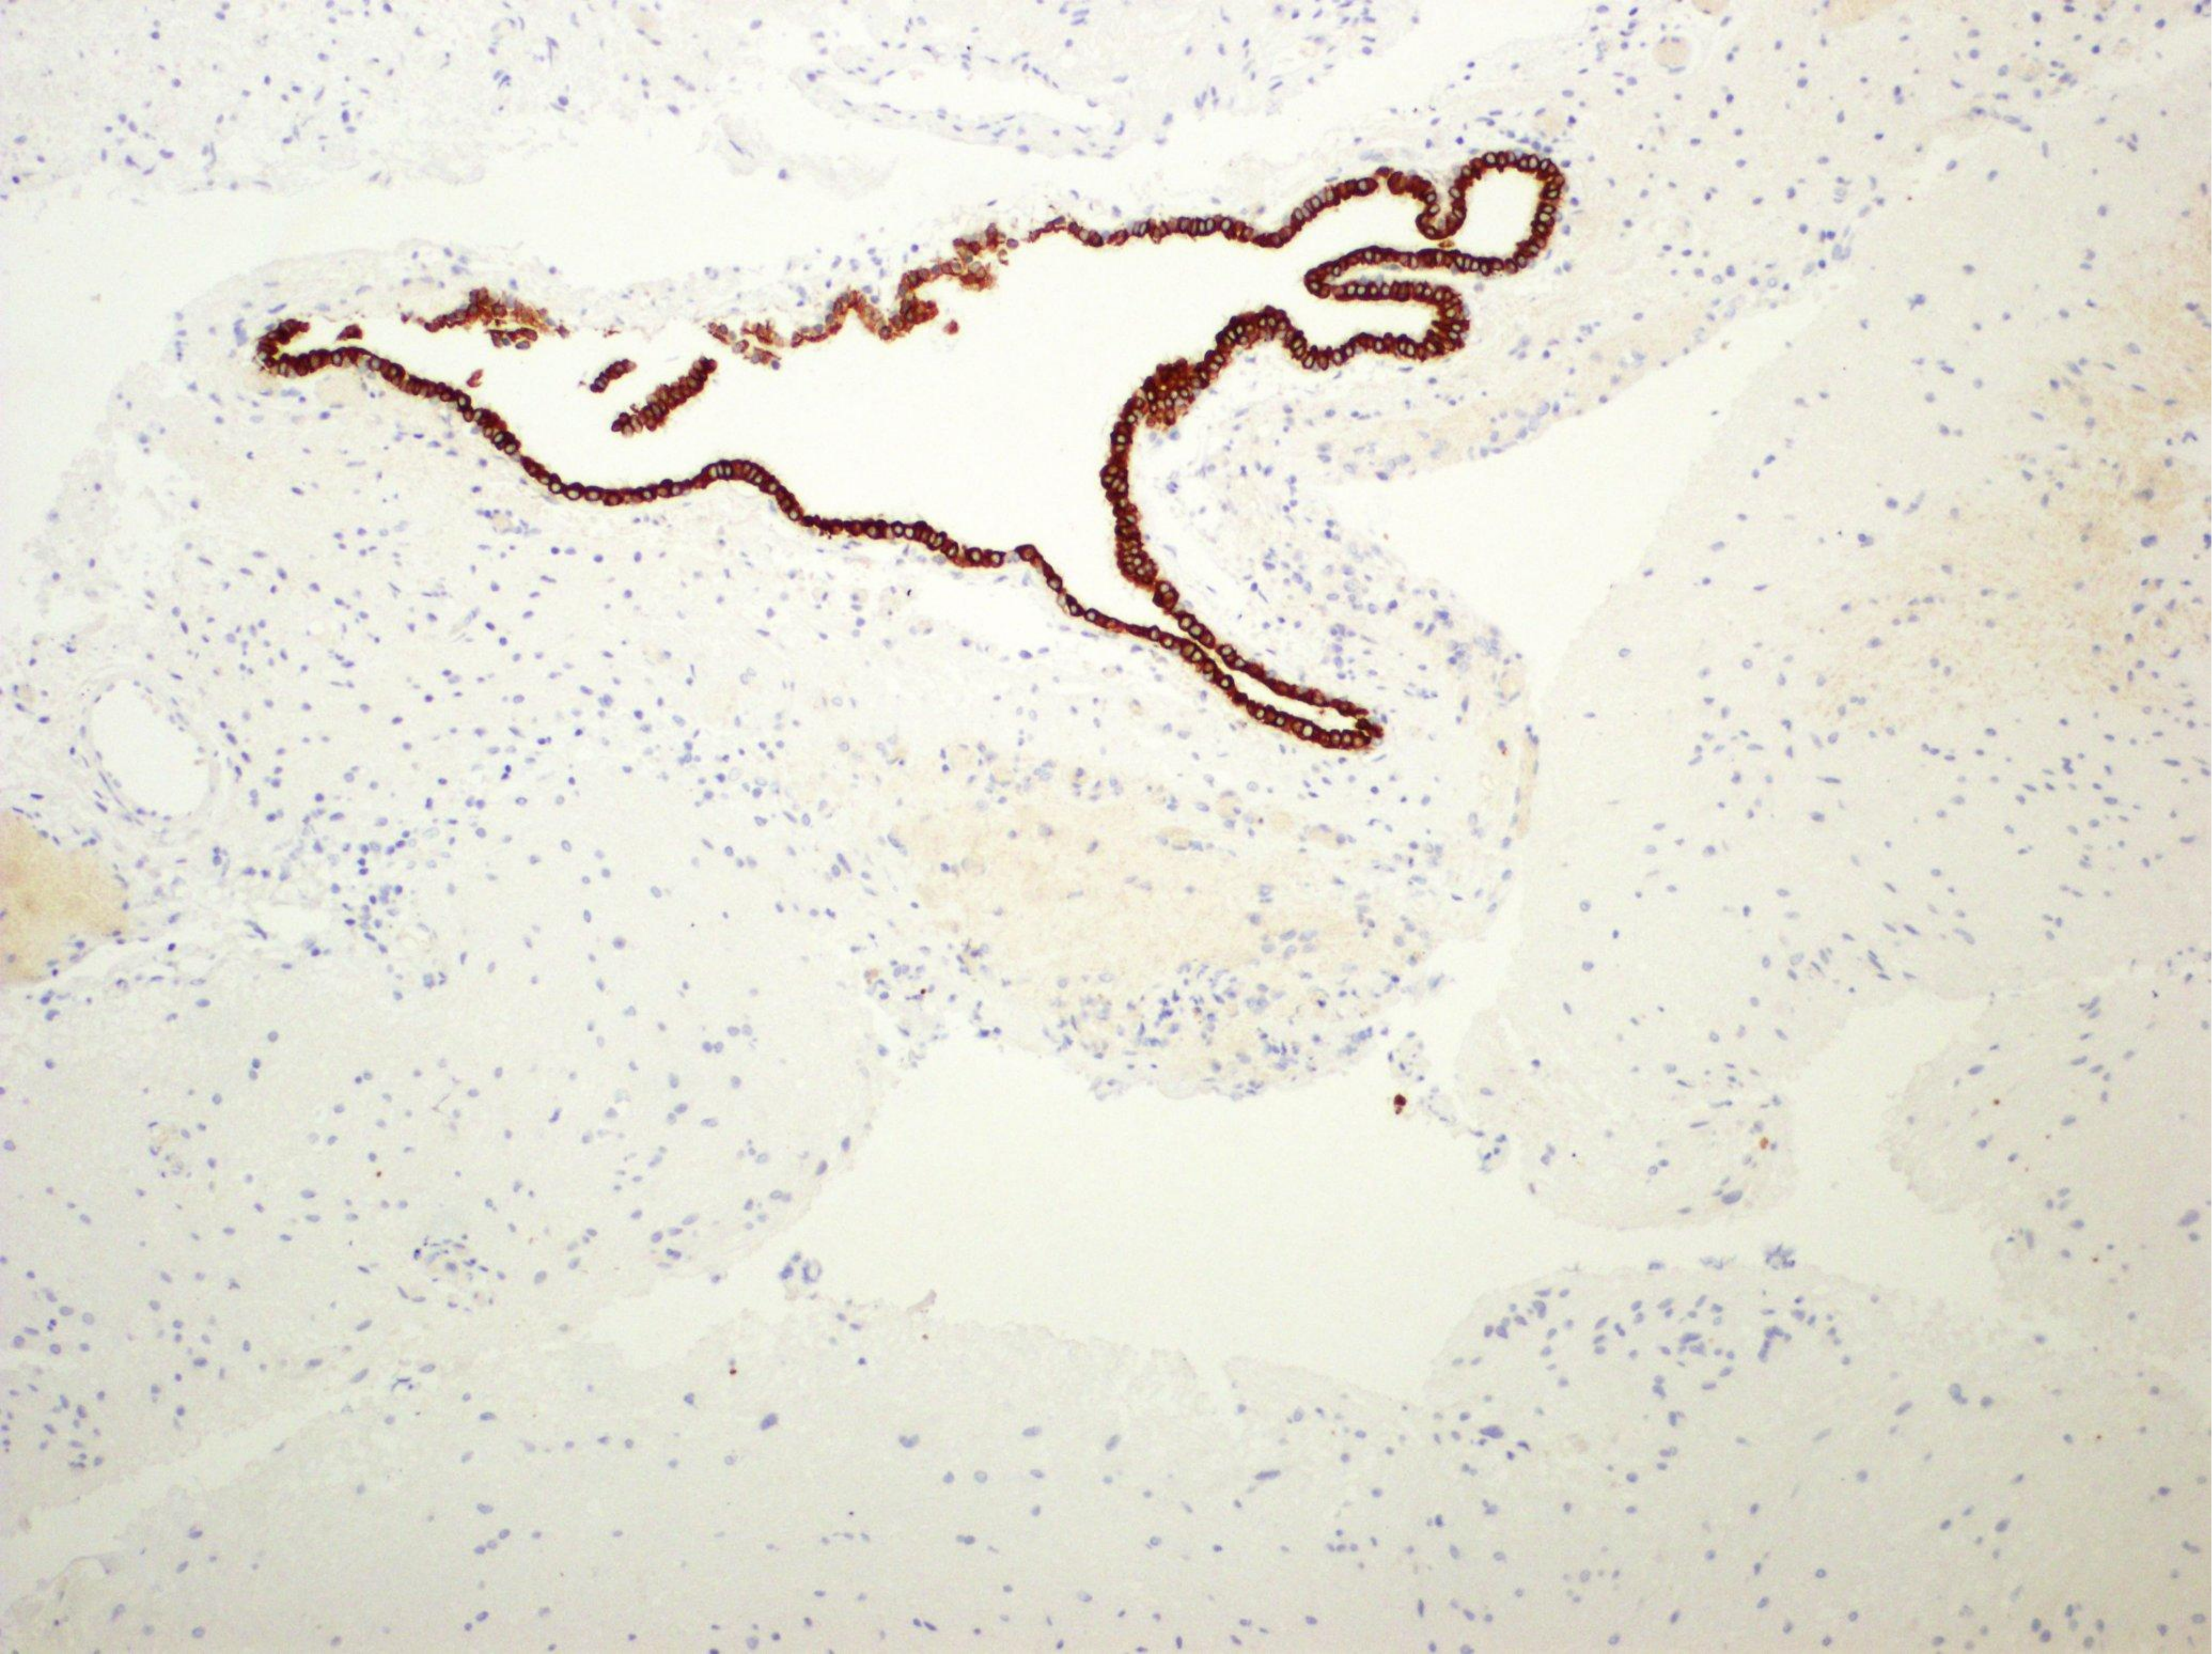



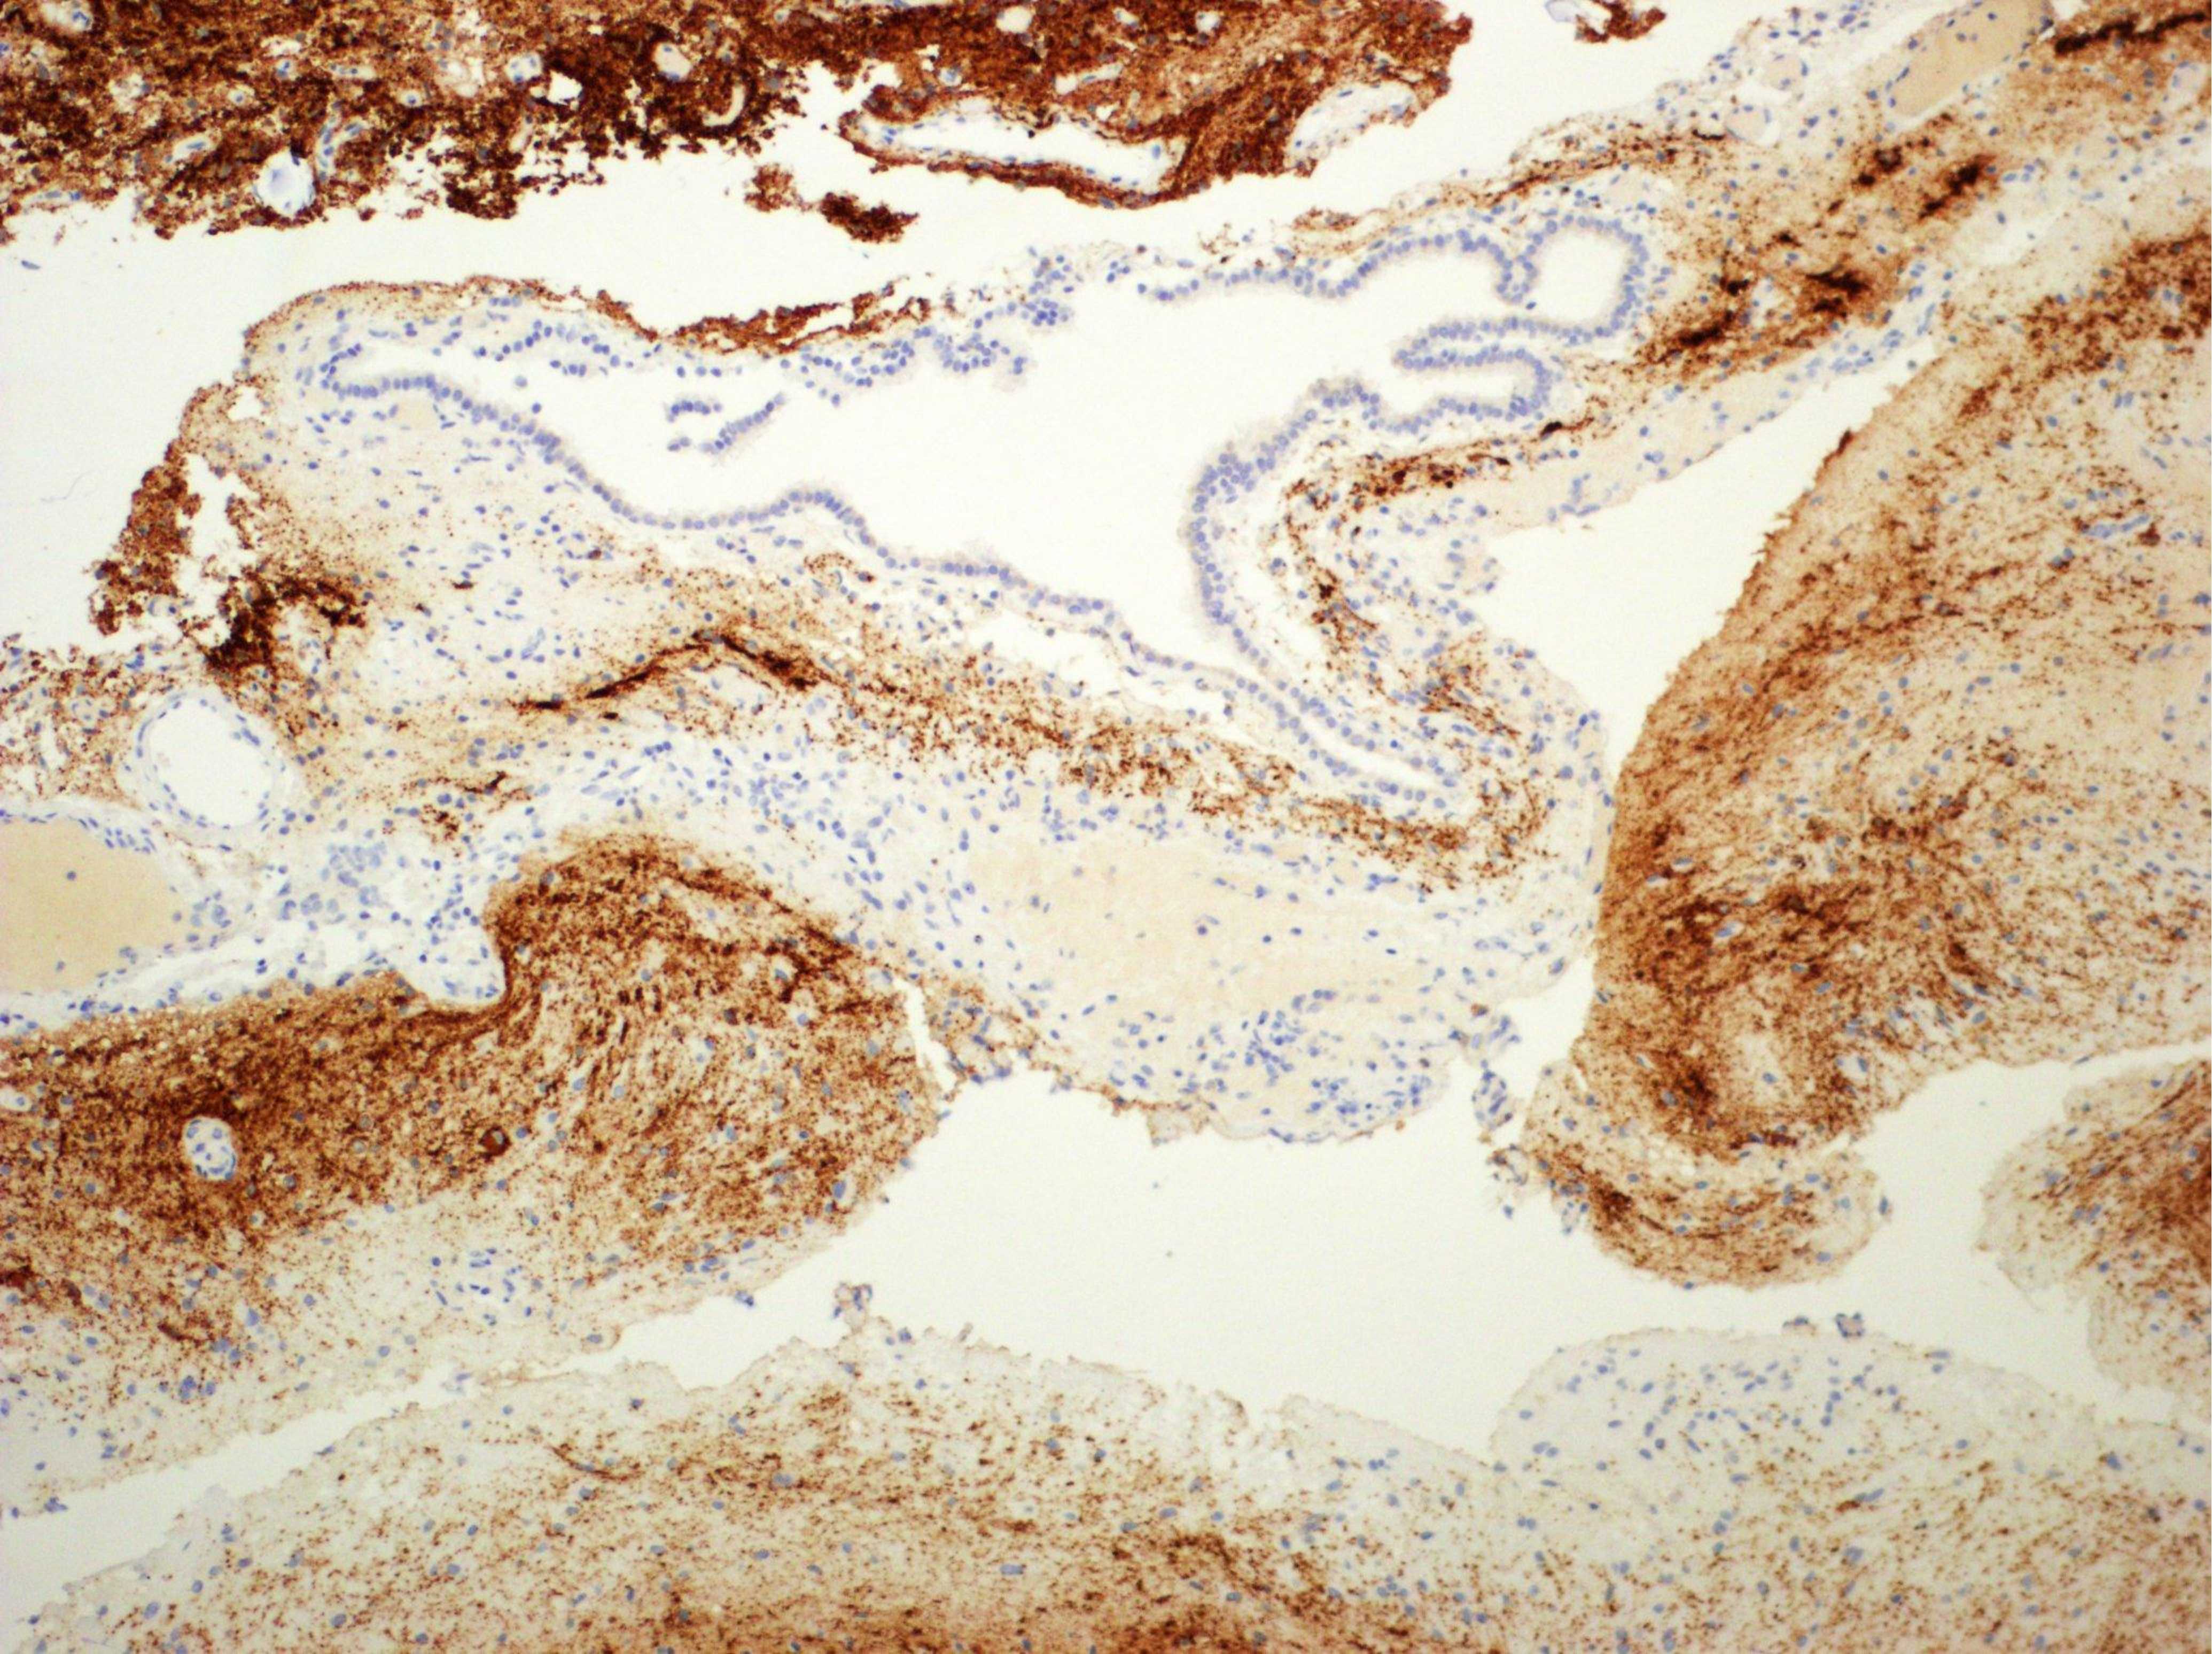



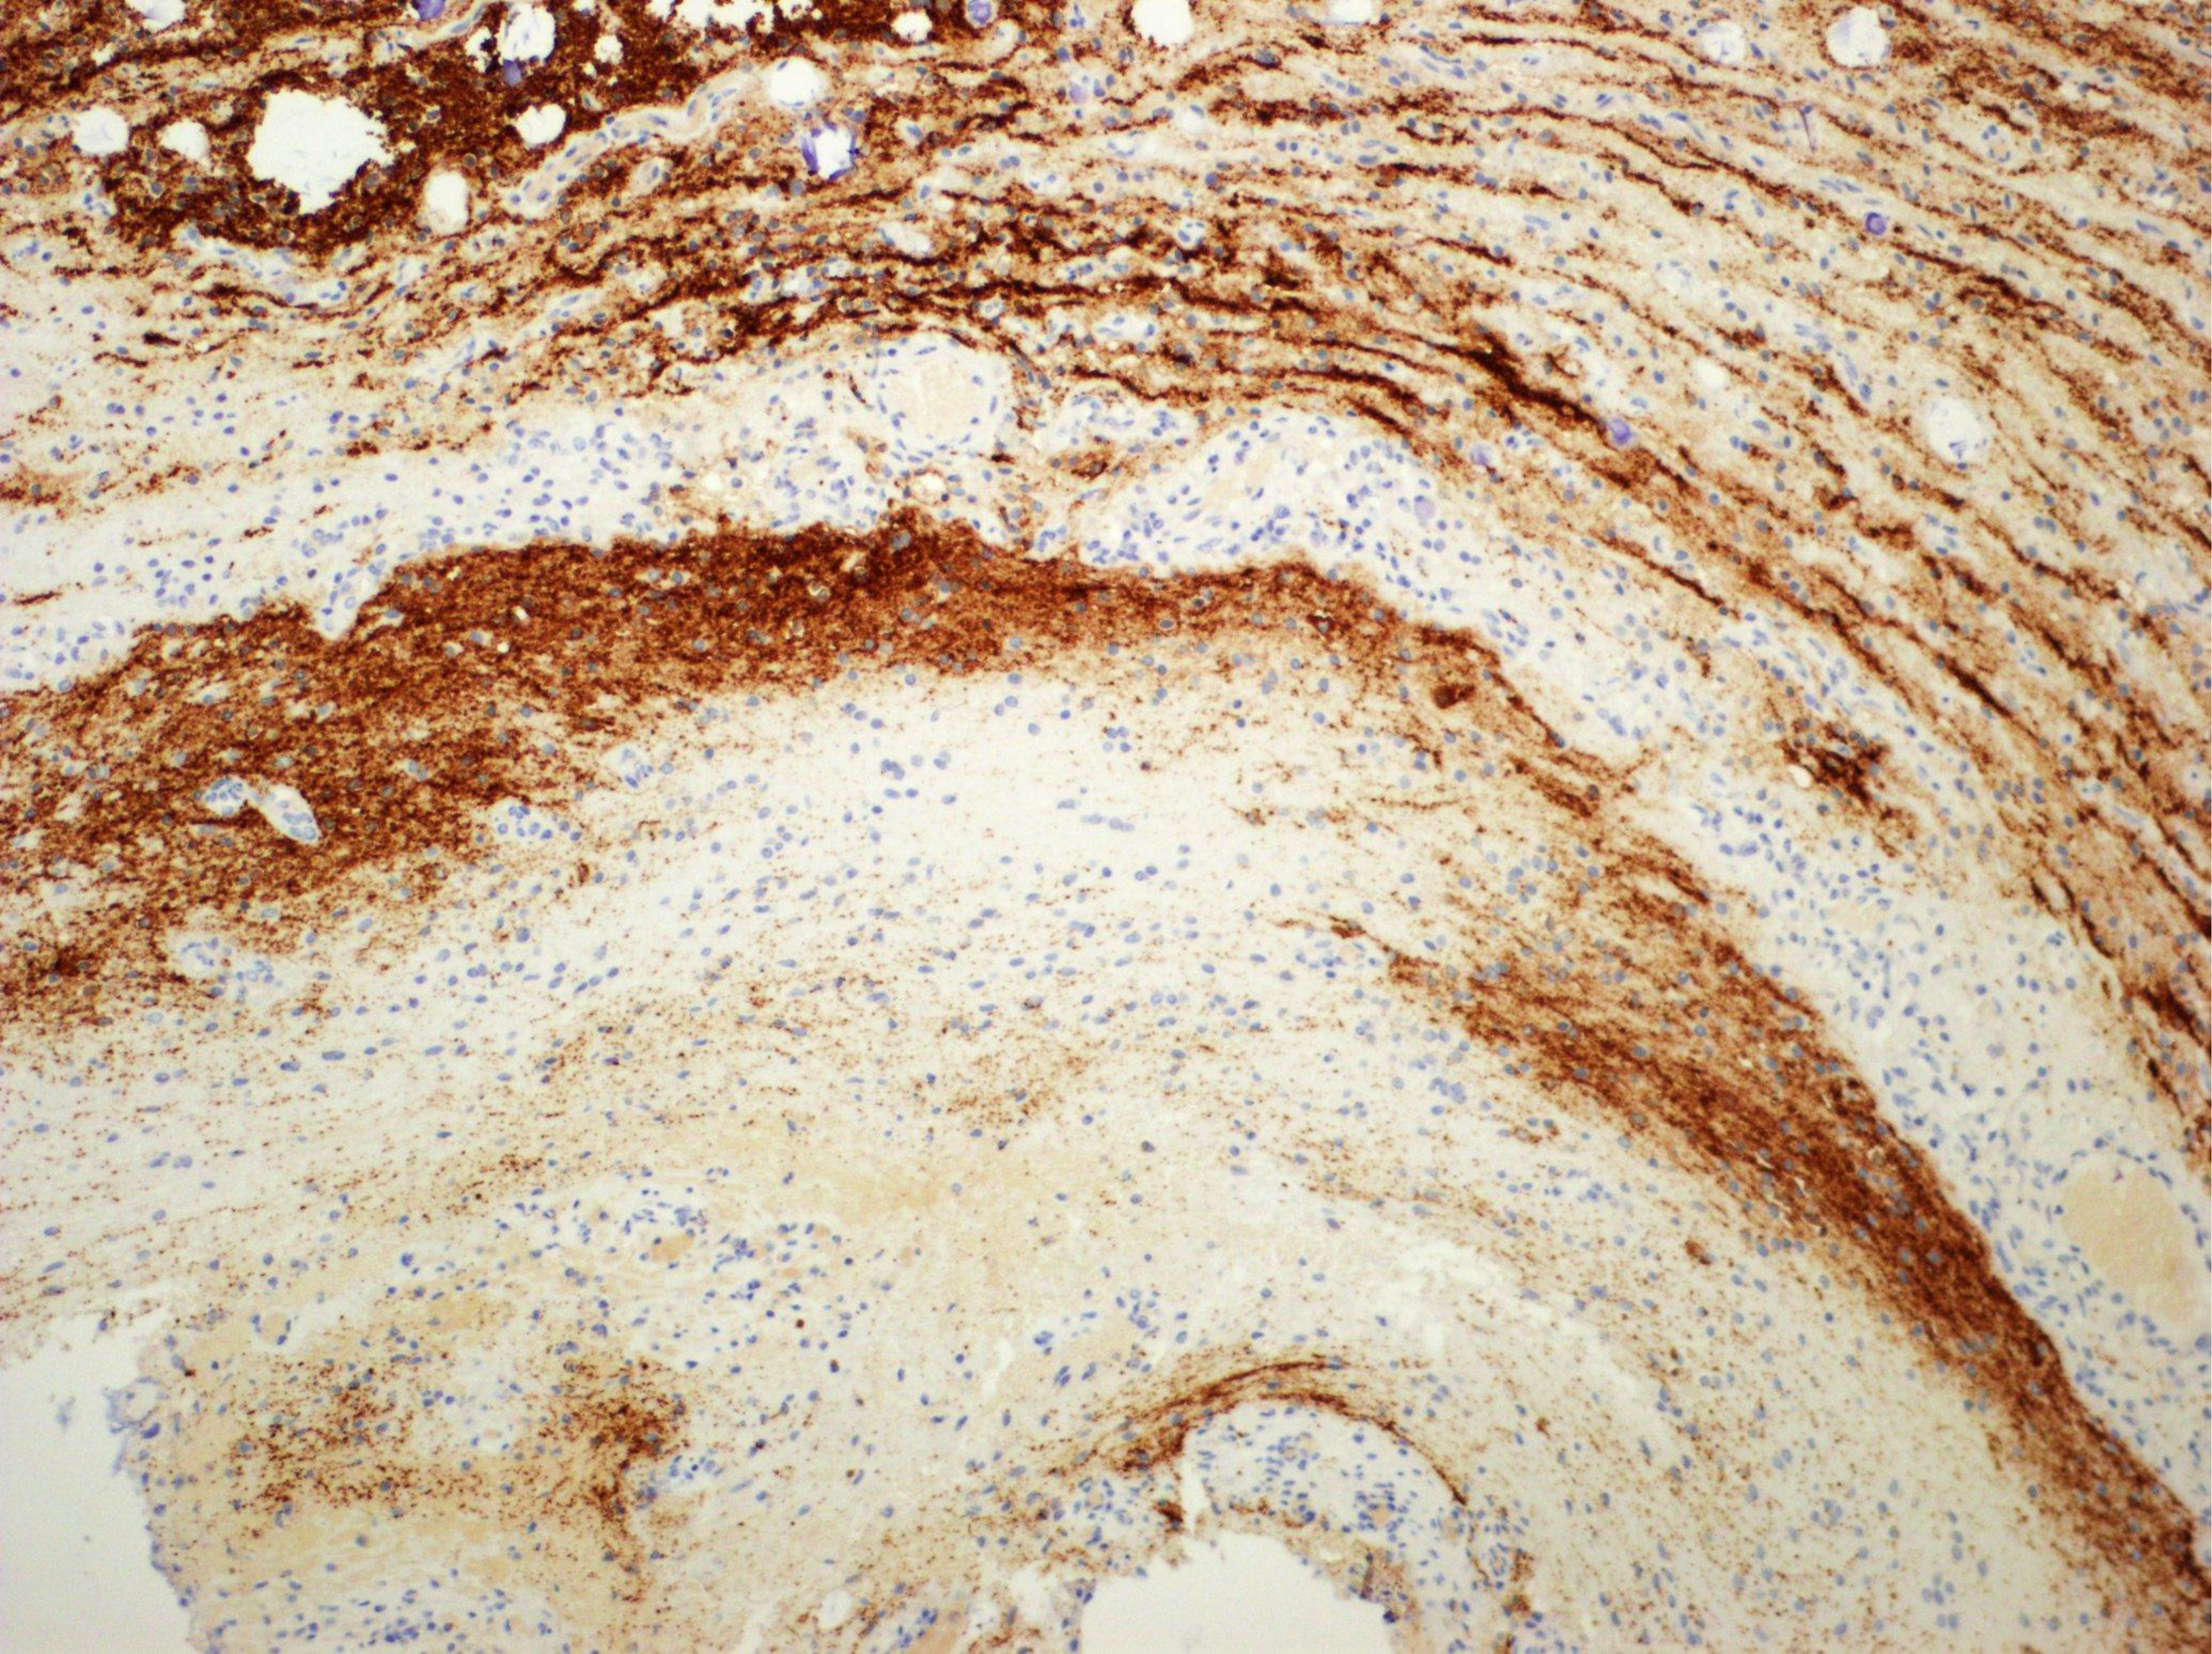



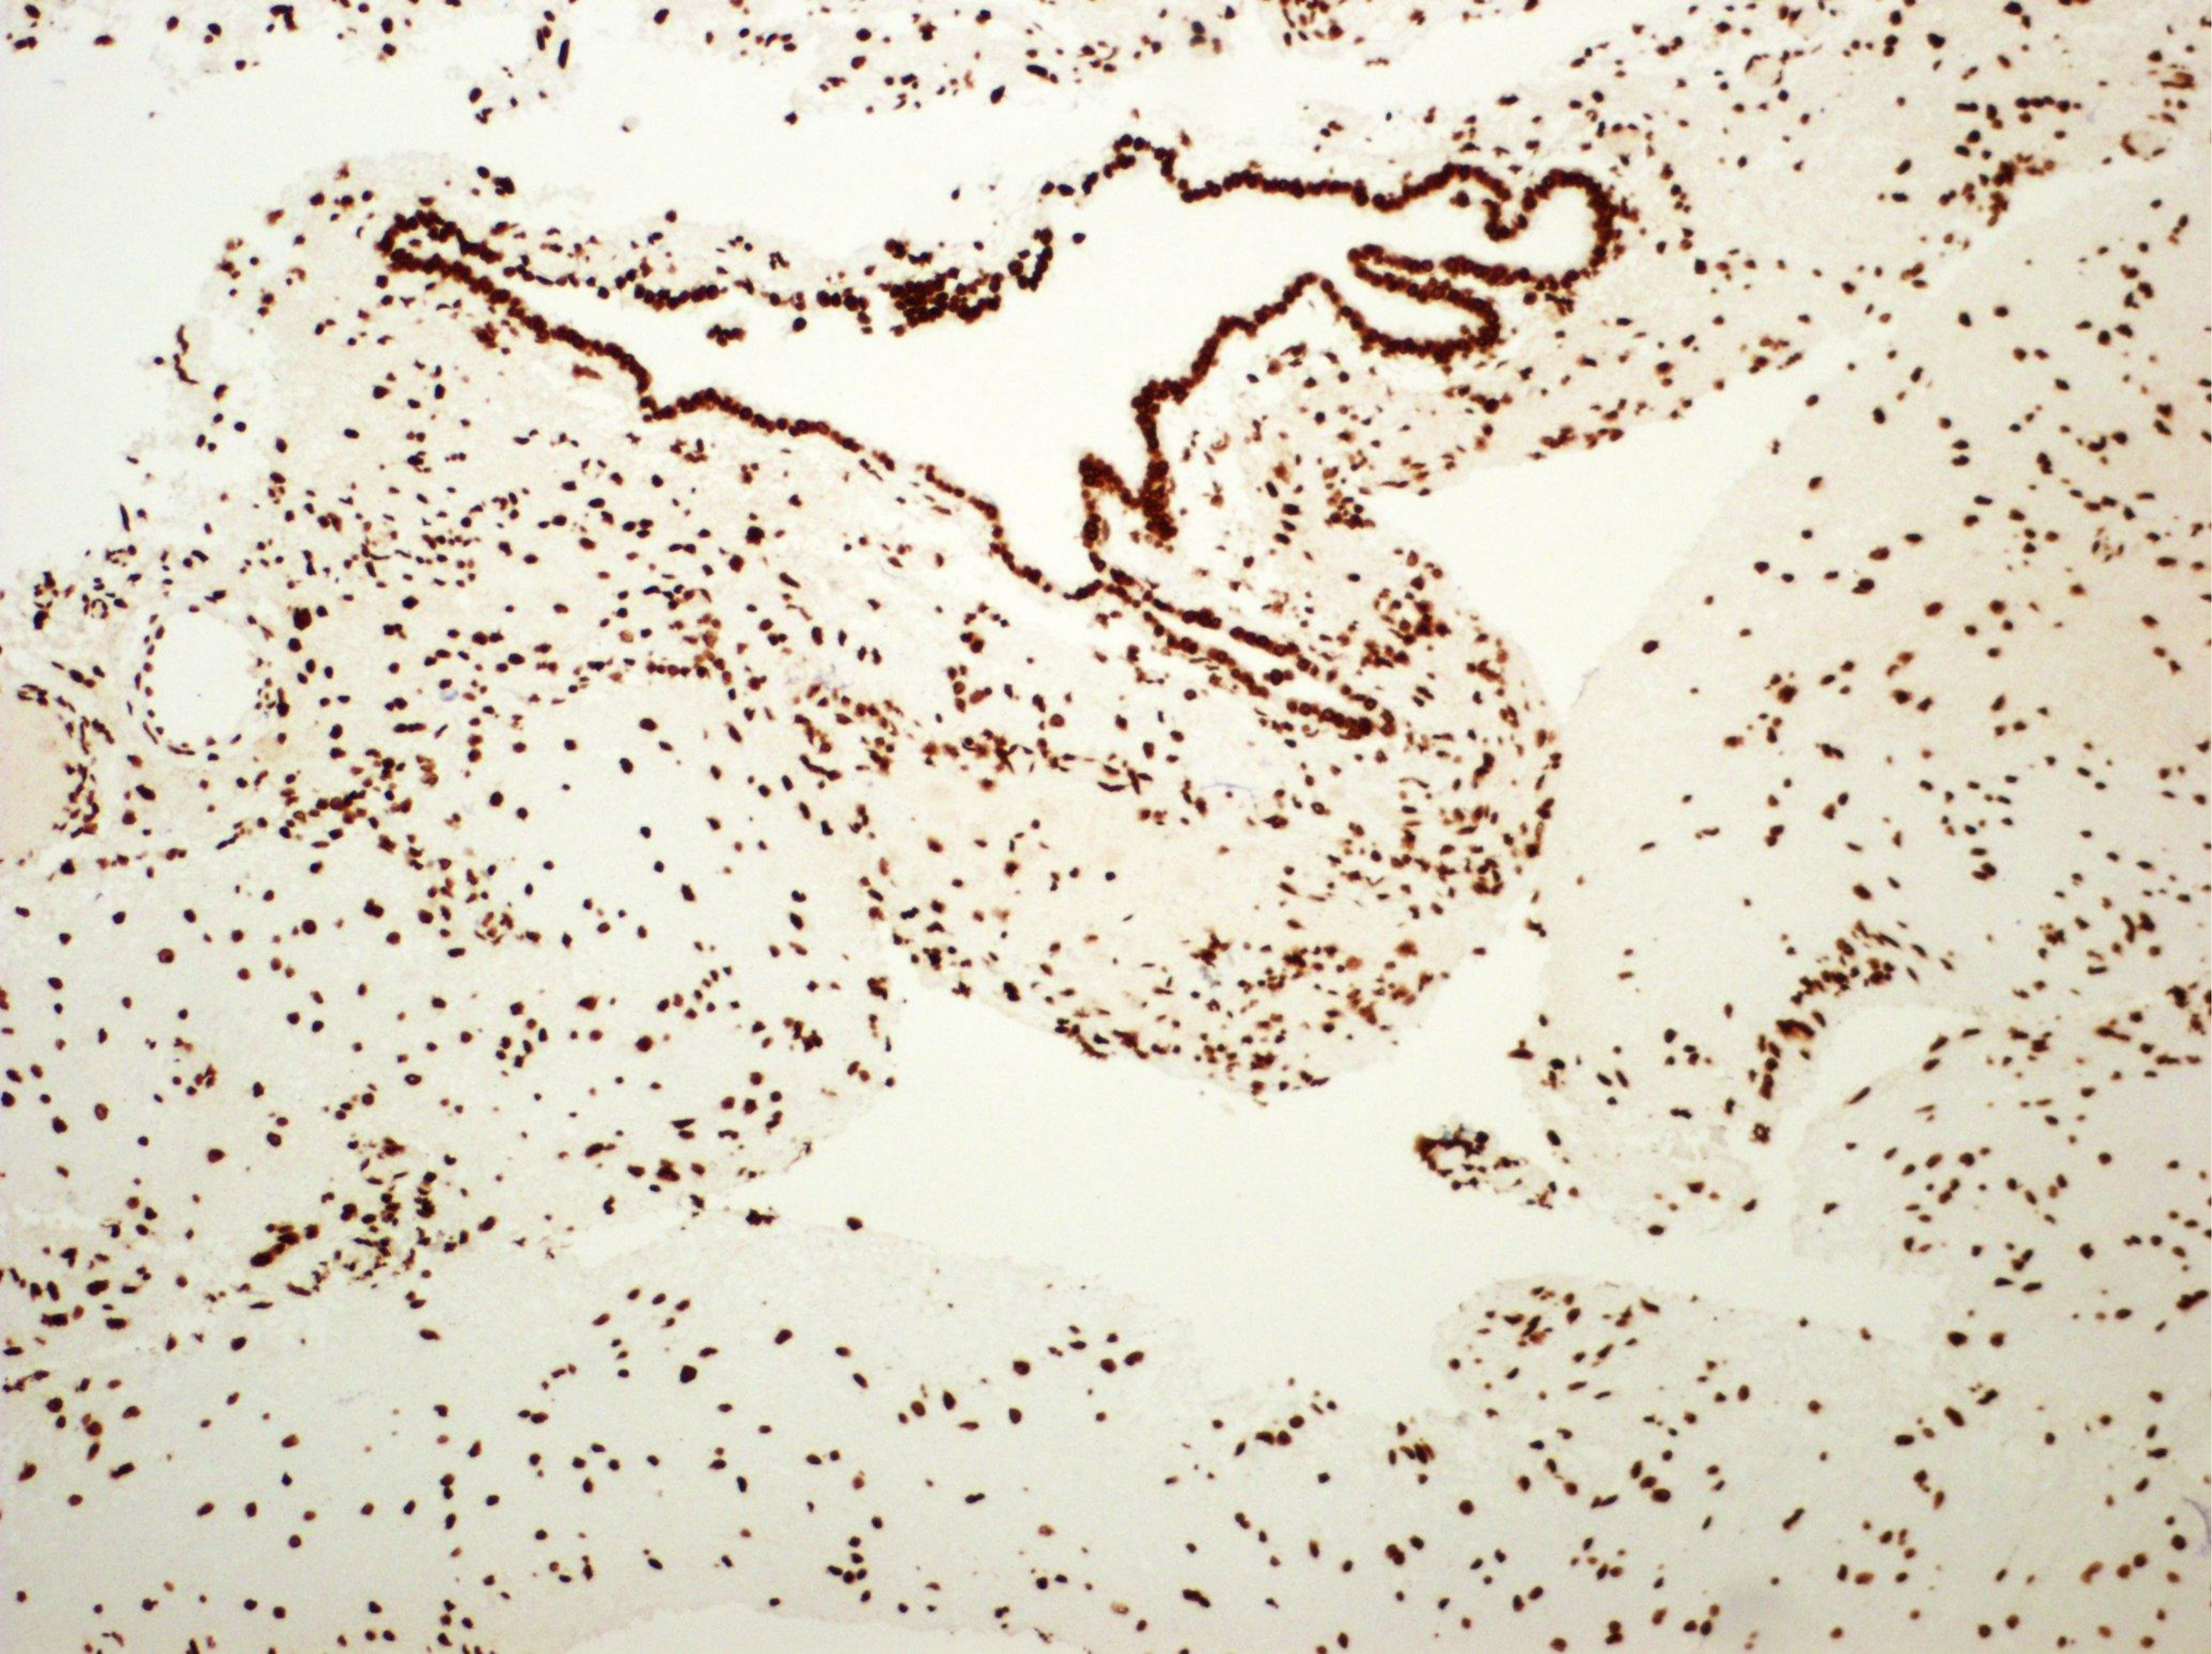



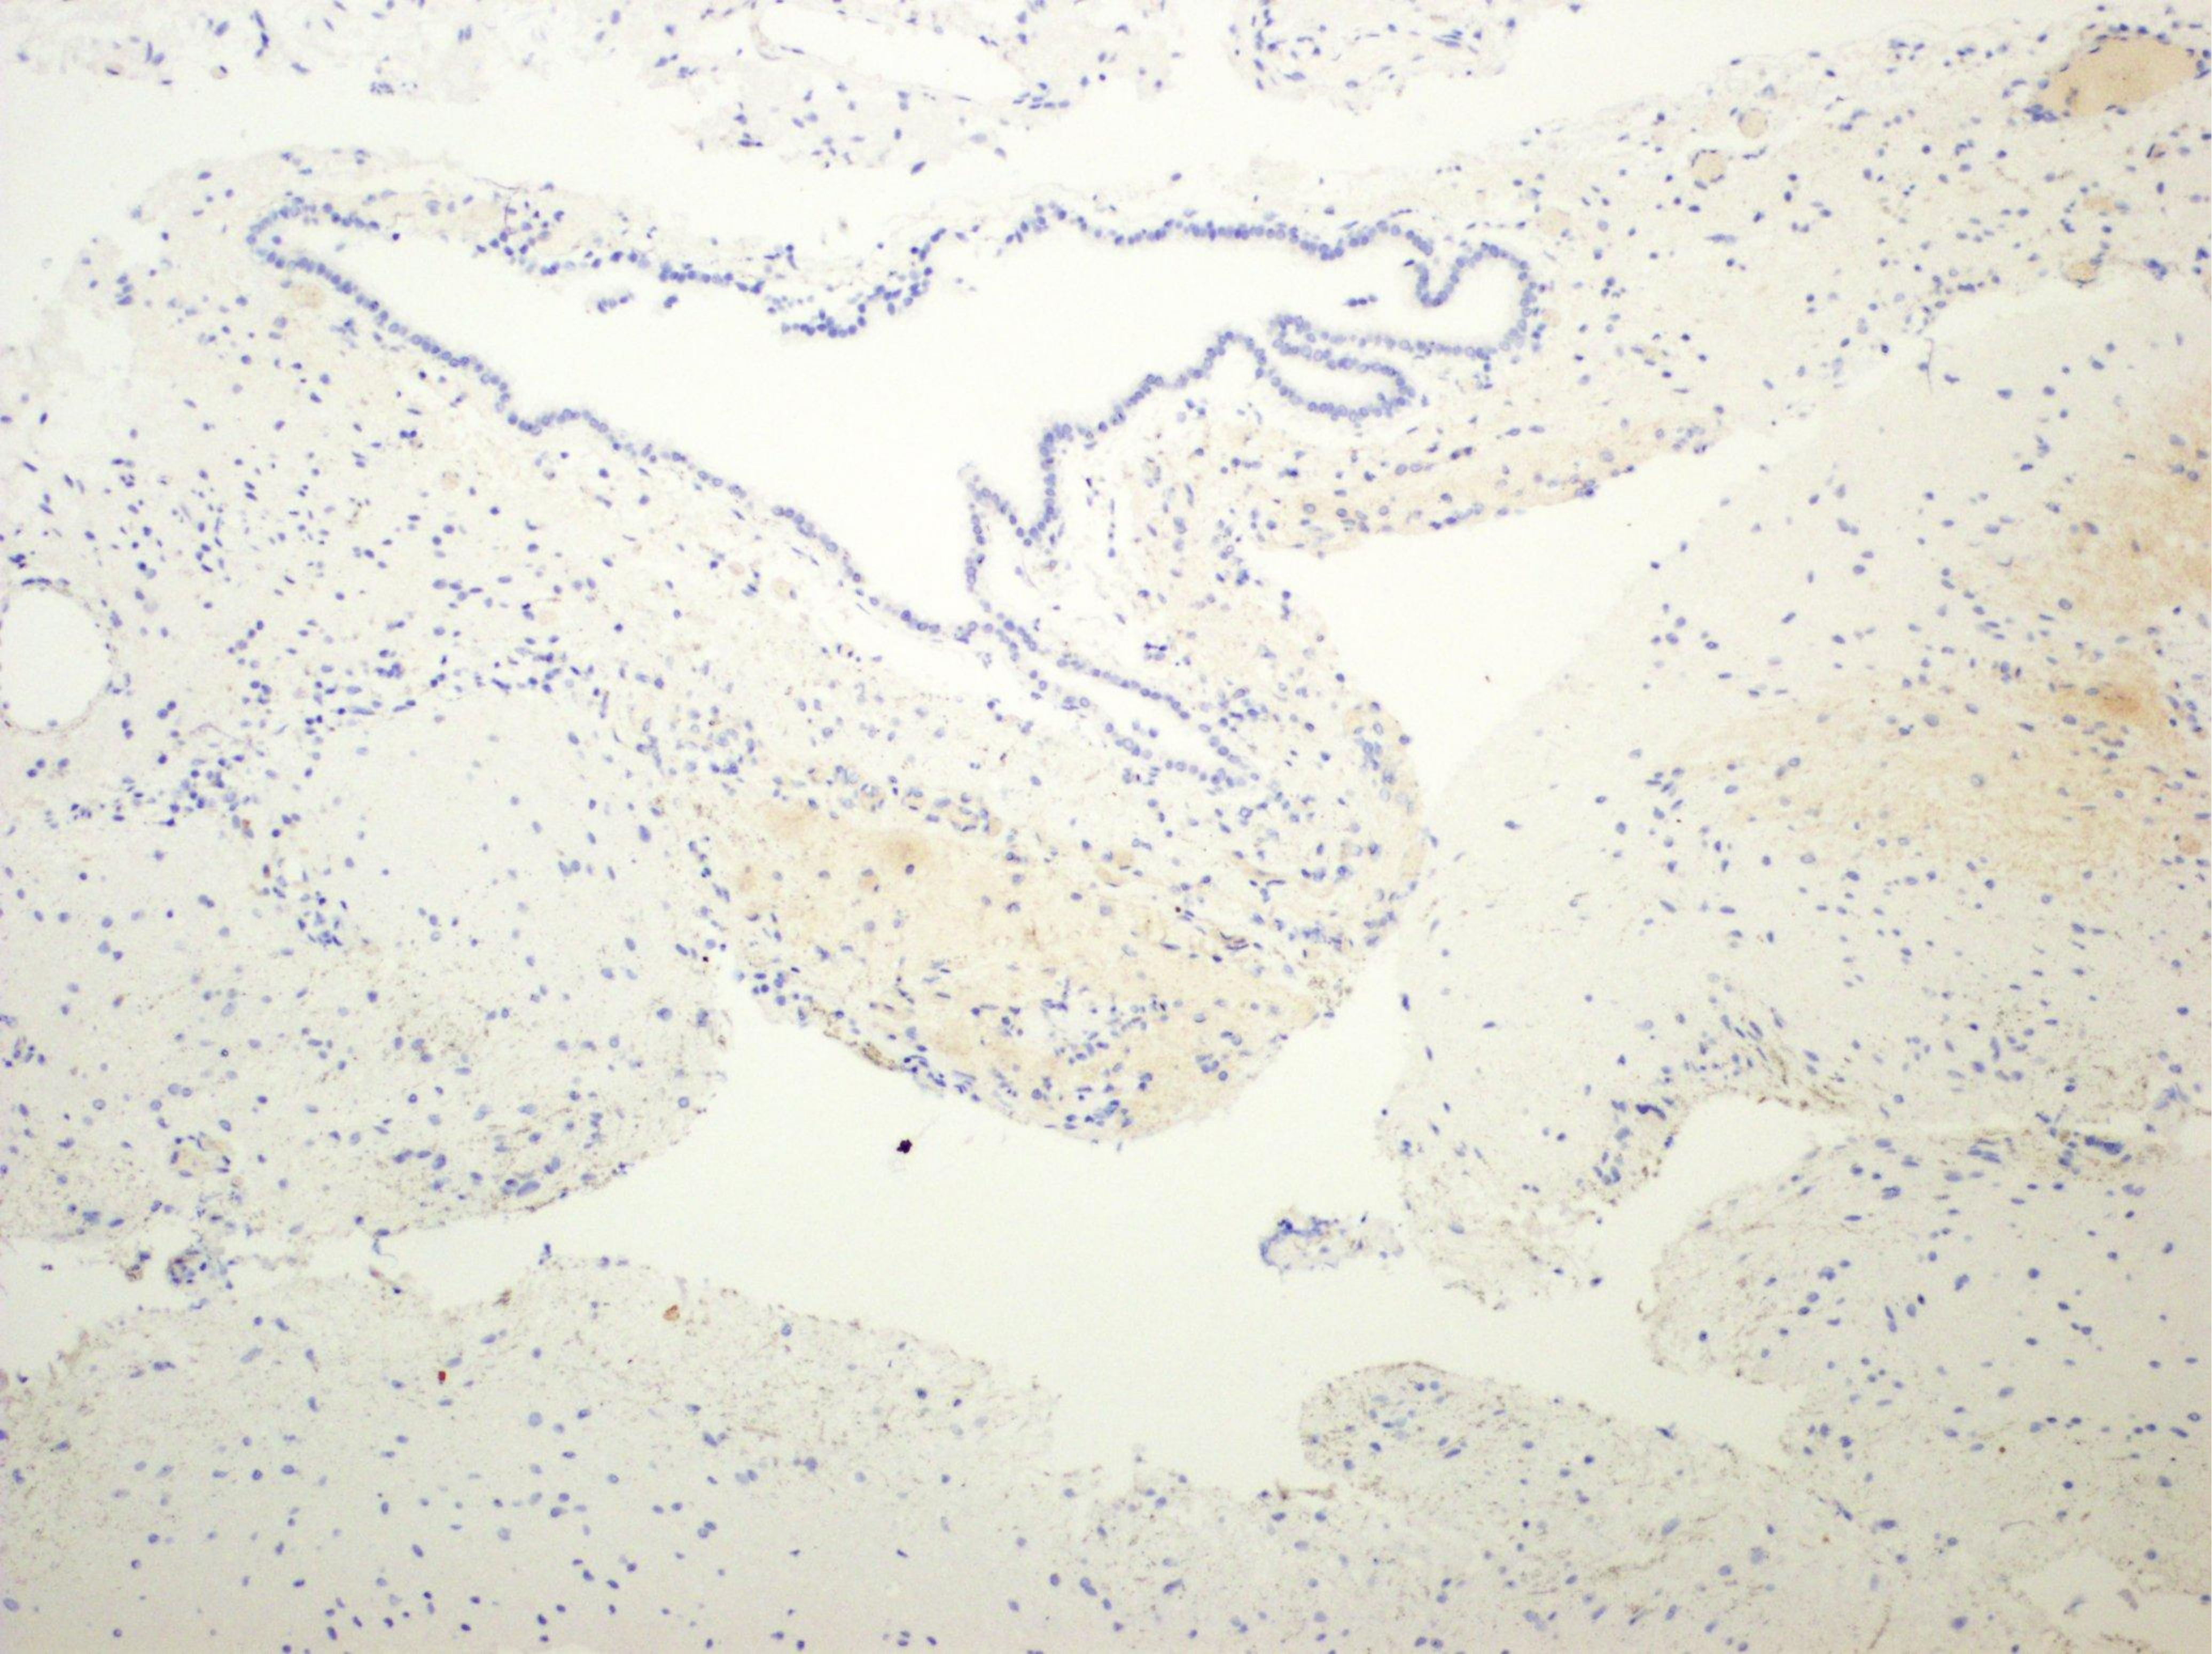



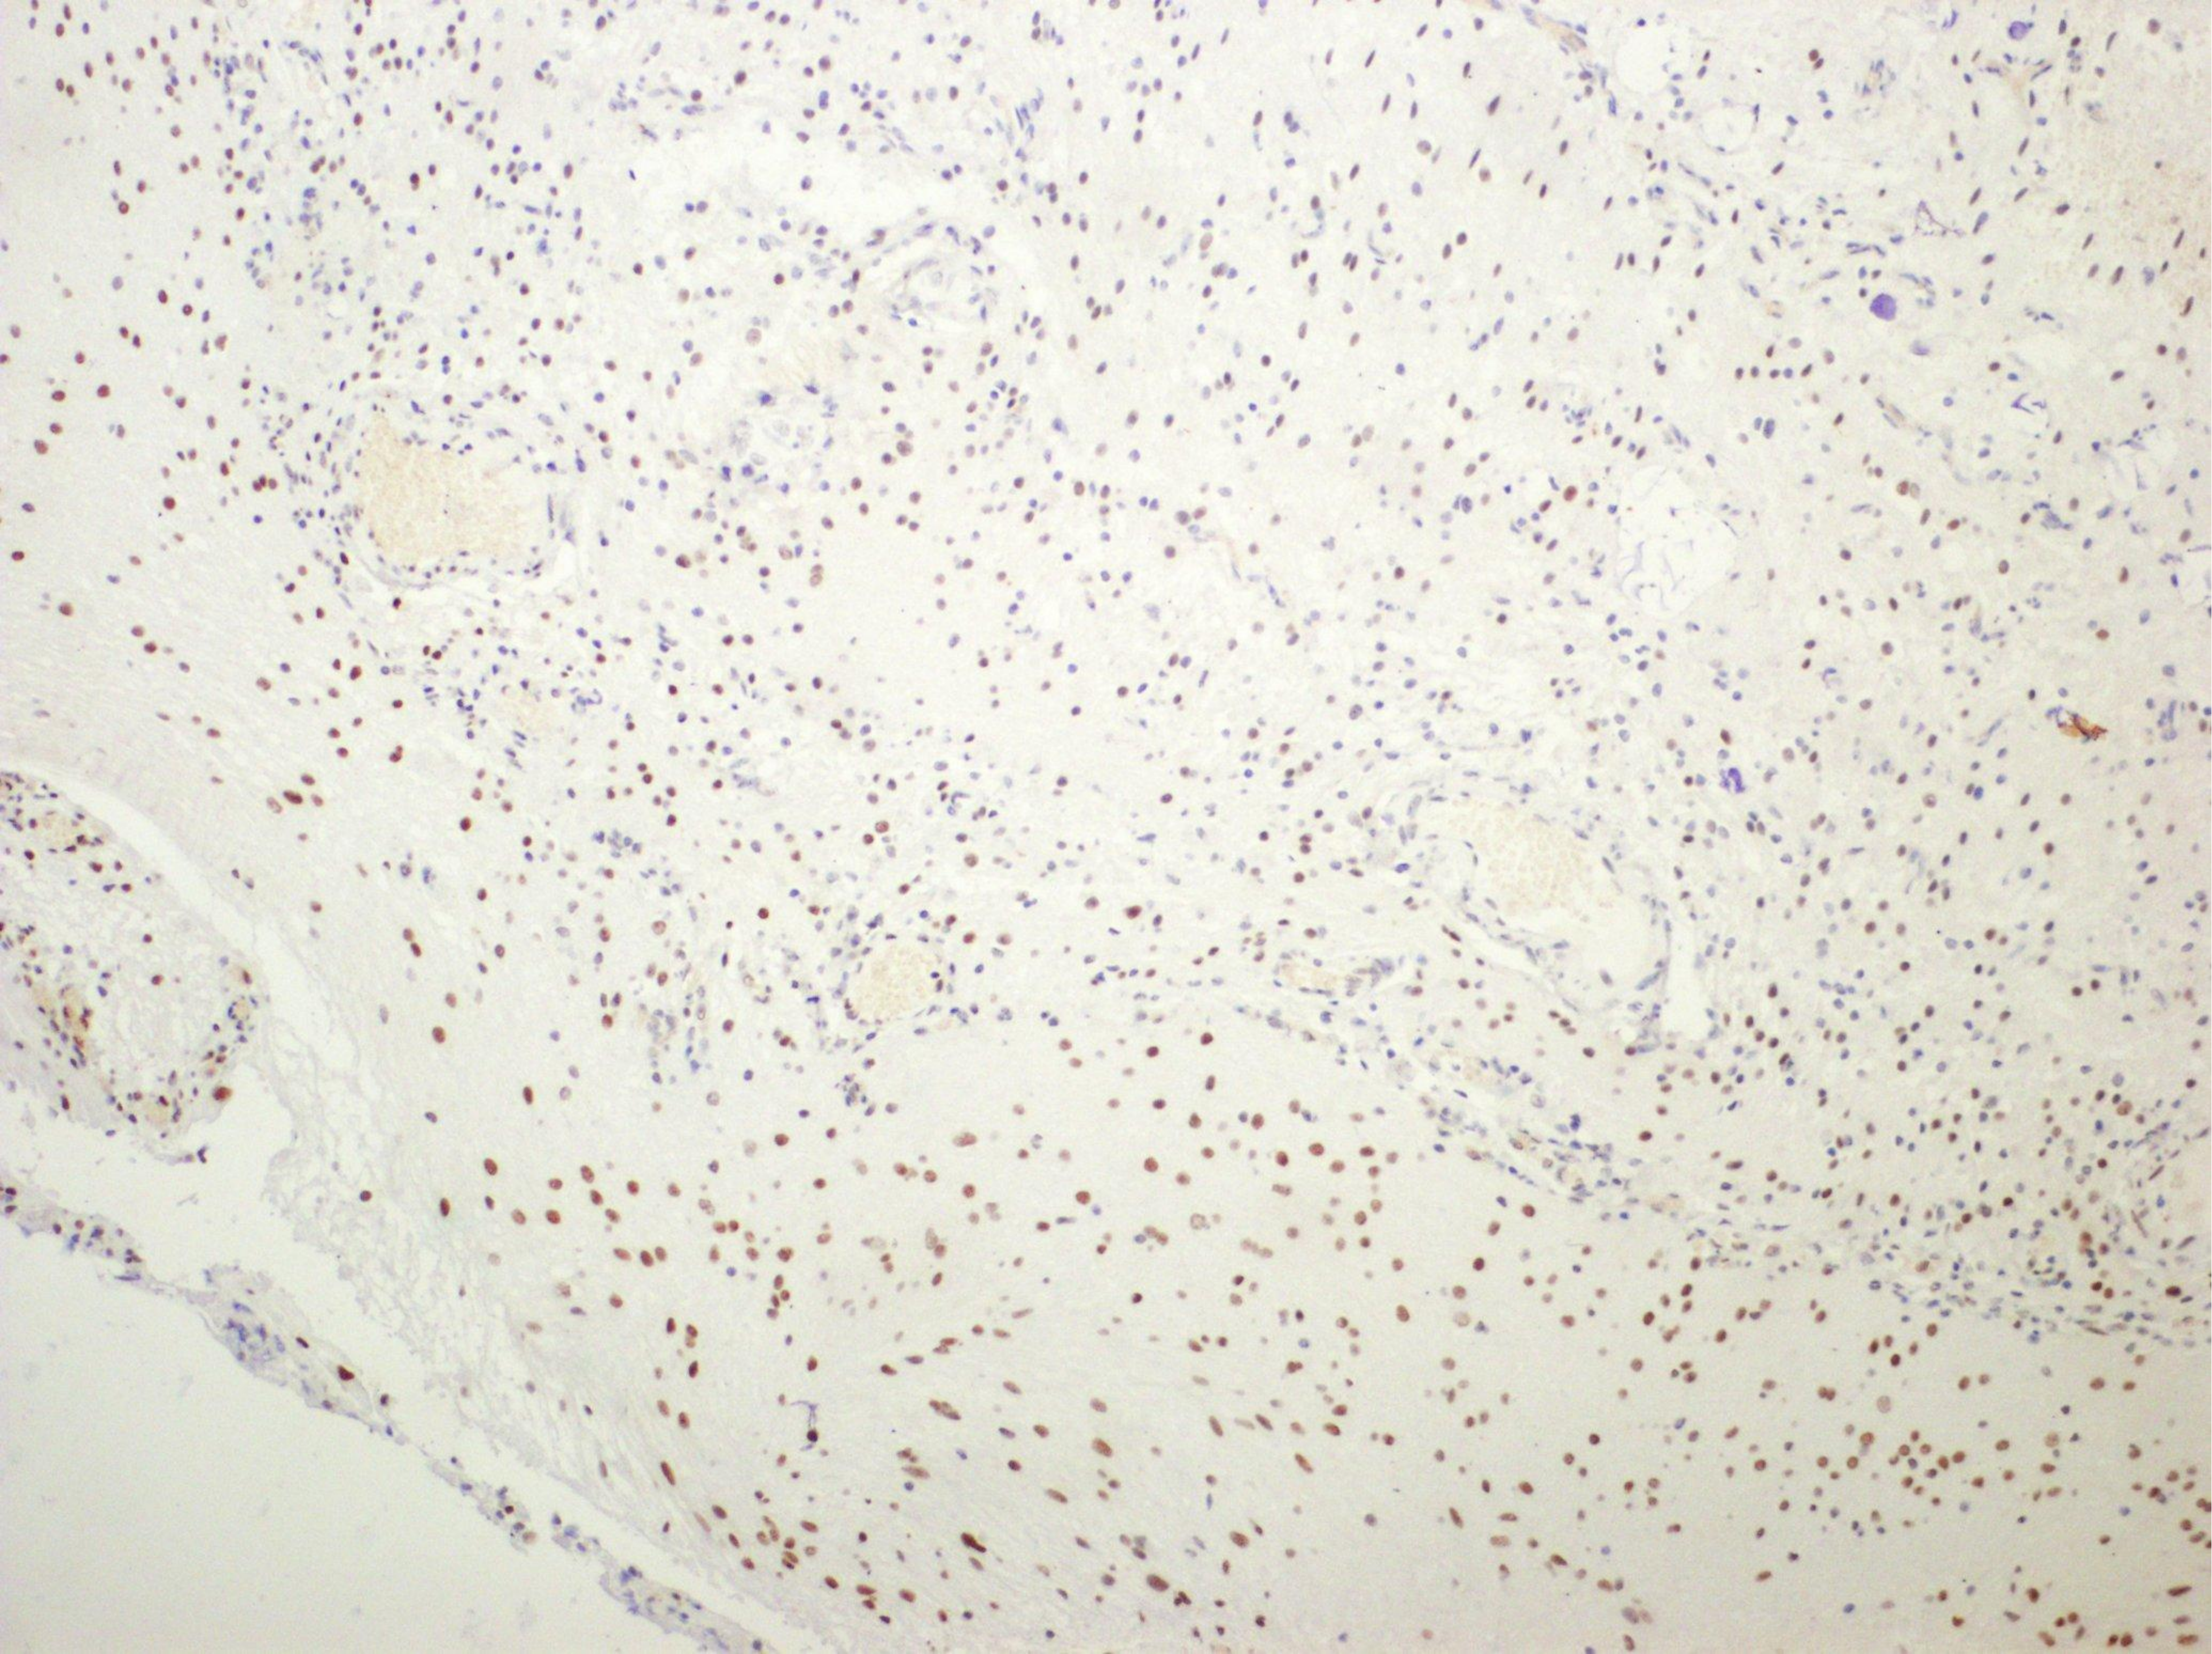



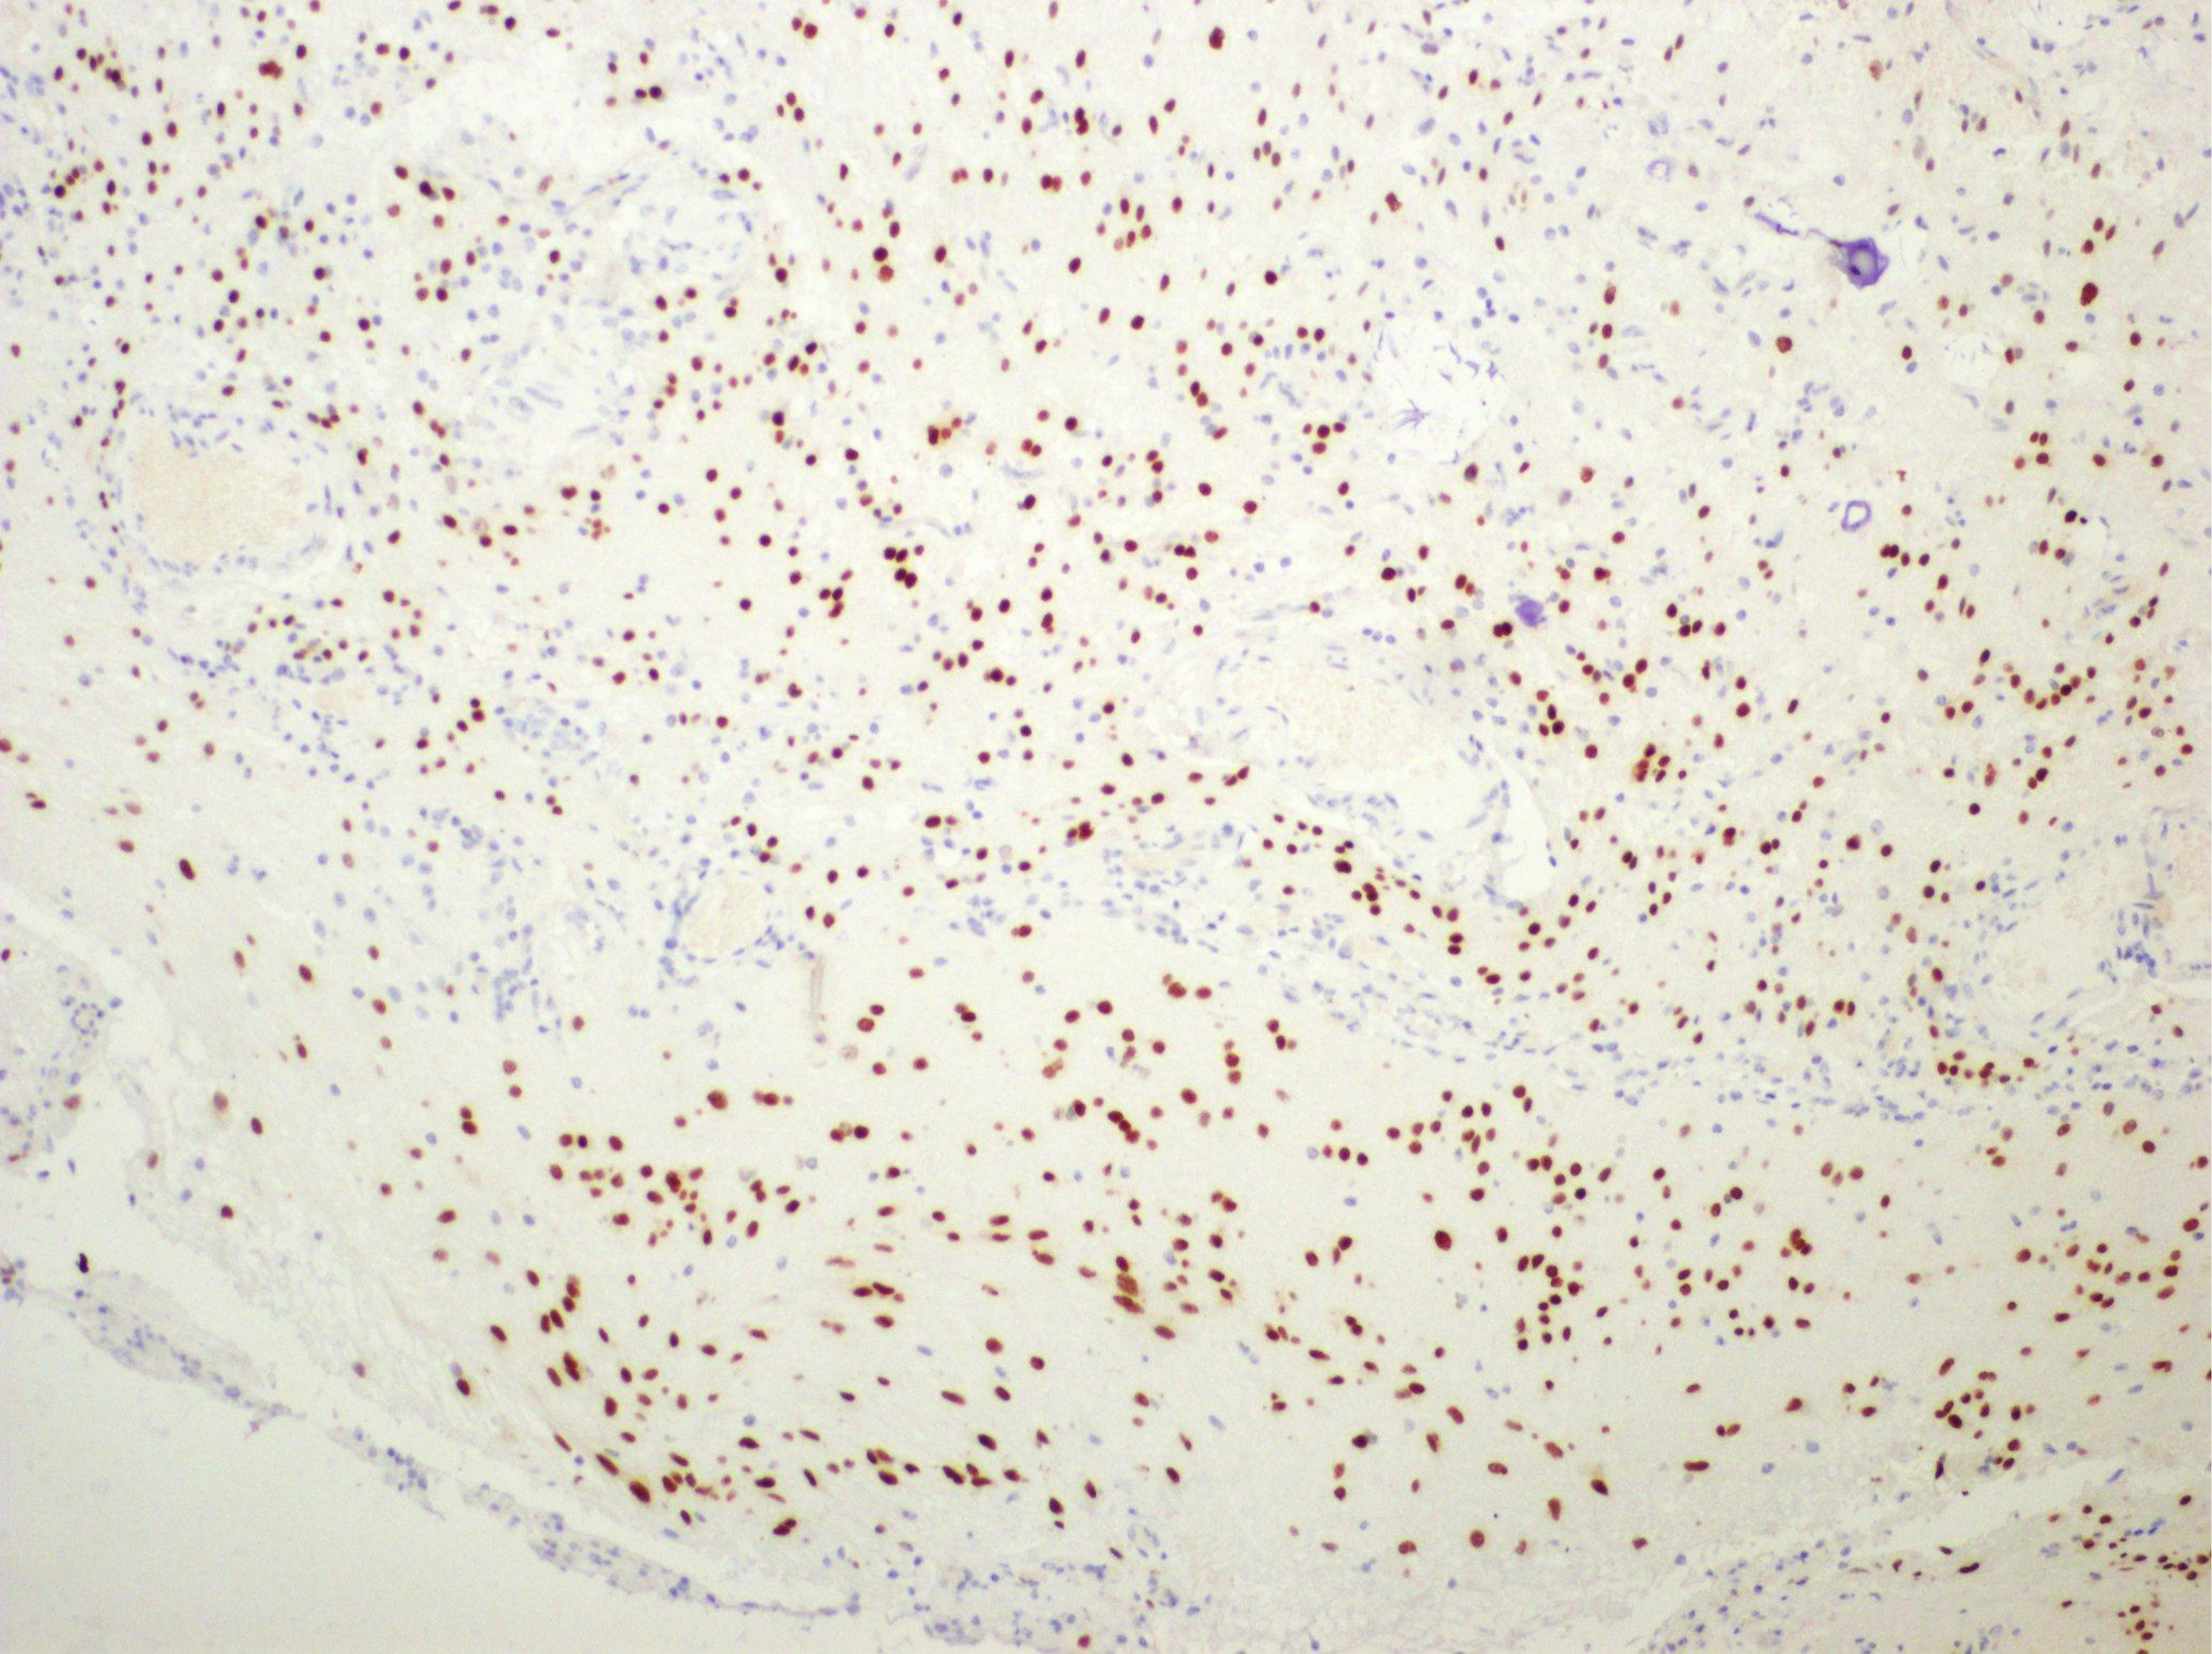



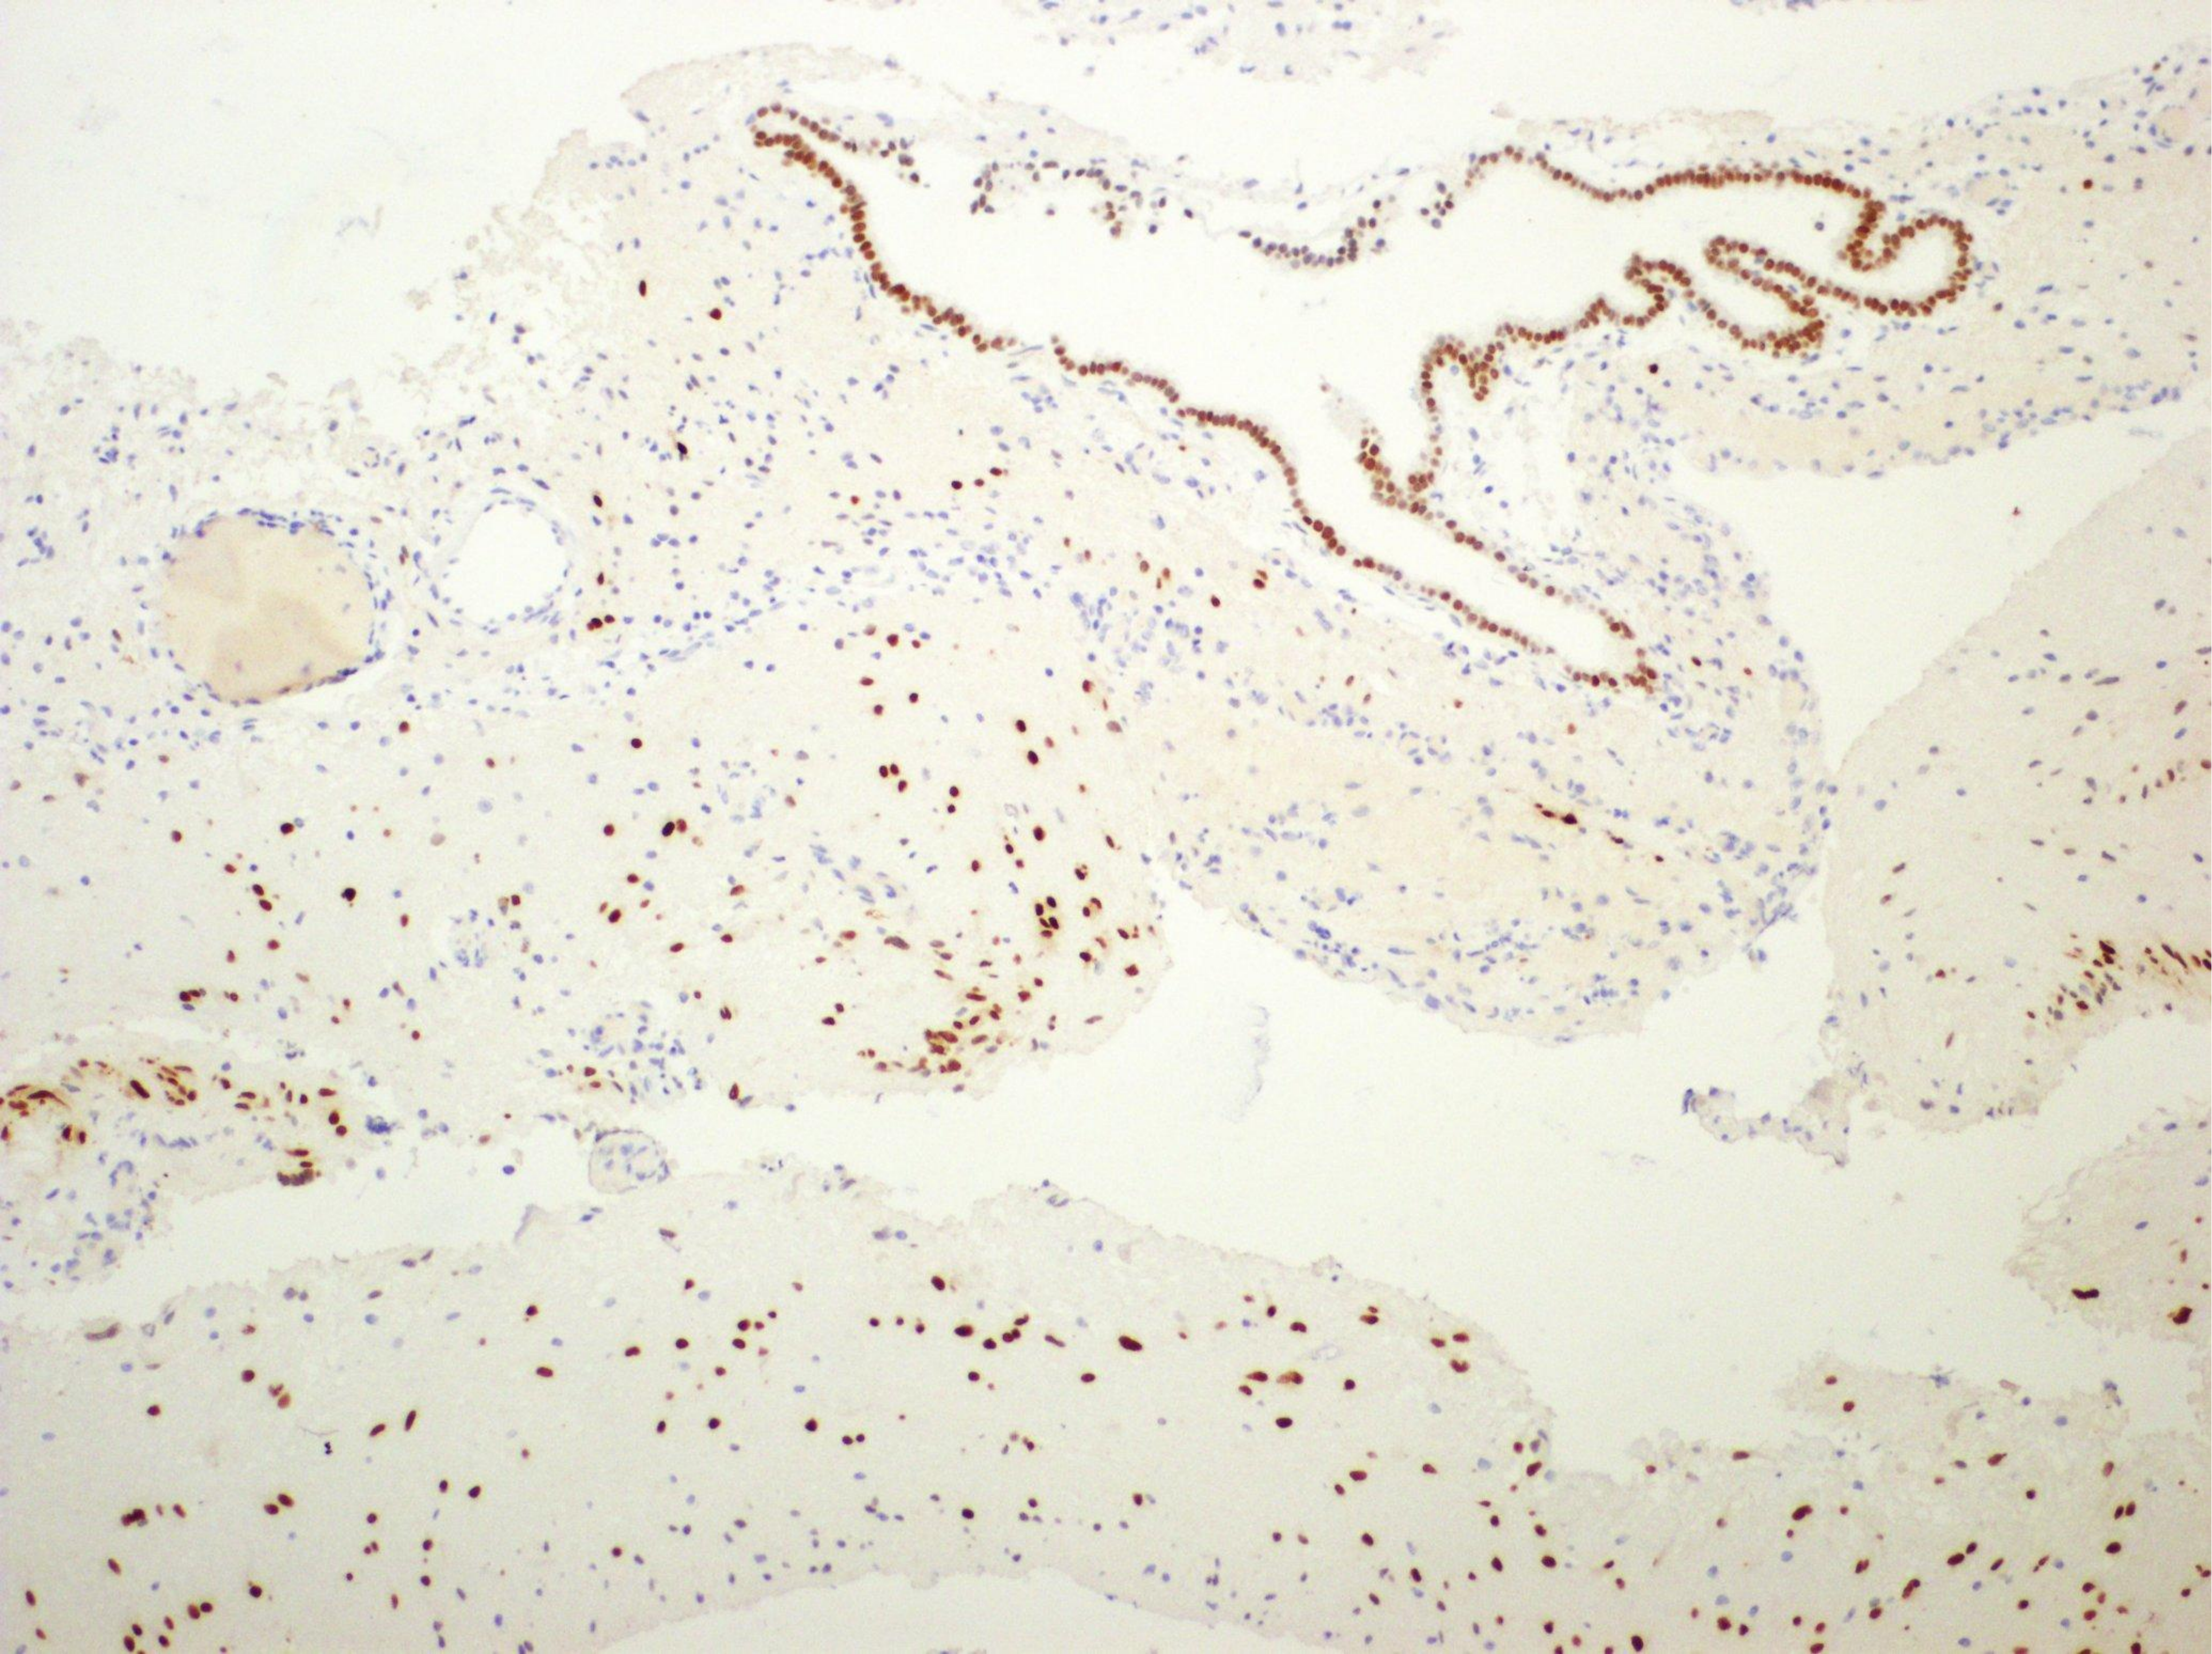

Supplement: MOESM1 [file 26697154]
